# Supplementary material for: Deregulation of MYCN, LIN28B and LET7 in a Molecular Subtype of Aggressive High-Grade Serous Ovarian Cancers
Source: PLOS journal article supplement (doi:10.1371/journal.pone.0018064), 2011-04-13
Supplement: S12 (10.1371/journal.pone.0018064.s012) [file journal.pone.0018064.s012]

**Supplementary Table 6:** Summary of FISH on TMA for AOCS samples of known molecular subtype

|                                                                        | C5             | Non-C5         |
|------------------------------------------------------------------------|----------------|----------------|
| Samples (n)                                                            | 16             | 57             |
| Normal Copy number at <i>LIN28B</i> / <i>HACE1</i> locus               | 12             | 39             |
| Gain of <i>LIN28B</i> probe                                            | 1 <sup>*</sup> | 1 <sup>§</sup> |
| Gain of <i>HACE1</i> probe                                             | 0              | 0              |
| Gain of loci (both probes)                                             | 3              | 9              |
| Loss of <i>LIN28B</i> probe                                            | 0              | 0              |
| Loss of <i>HACE1</i> probe                                             | 0              | 0              |
| Loss of Loci (both probes)                                             | 1 <sup>*</sup> | 9 <sup>§</sup> |
| Re-arrangements (break apart of <i>HACE1</i> and <i>LIN28B</i> probes) | 0              | 0              |

**\*Inconsistency between replicate cores for 1 C5 sample, one core showing gain of *LIN28B* probe and an independent core showing only a single copy of the *LIN28B* and *HACE1* locus**

**§ Inconsistency between replicate cores for 1 Non-C5 sample, one core showing gain of *LIN28B* probe and an independent core showing only a single copy of the *LIN28B* and *HACE1* locus**

|                     | C5 | Non-C5 |
|---------------------|----|--------|
| Neutral Copy Number | 12 | 39     |
| Any Gain of Loci    | 4  | 10     |
| Any Loss of Loci    | 1  | 9      |

|                |          |
|----------------|----------|
| Chi-square     |          |
| Chi-square, df | 1.215, 2 |
| P value        | 0.5446   |
