# Supplementary material for: Deregulation of MYCN, LIN28B and LET7 in a Molecular Subtype of Aggressive High-Grade Serous Ovarian Cancers
Source: PLoS One. 2011 Apr 13;6(4):e18064. doi: 10.1371/journal.pone.0018064 (PMC3076323; doi:10.1371/journal.pone.0018064)
Supplement: Table S1 — Summarized clinical annotations for samples from NCI. (XLS) [file pone.0018064.s007.xls]

## Sheet: AOCS
Supplementary Table 1: Summarized clinical annotations for samples from AOCS
Covariate
Age
	Mean (SD)	60 (11)
	Range	22 - 80
Stage
	I	24
	II	18
	III	217
	IV	22
Grade
	1	19
	2	97
	3	164
Type
	LMP	18
	Invasive	267
Histological Subtype
	Adeno	1
	Endometrioid	20
	Serous	264
Molecular Subtype
	C1	83
	C2	50
	C3	28
	C4	46
	C5	36
	C6	8
	Unclassified	34
Residual Disease
	Nil	84
	<1 cm	76
	>1 cm	72
	Unknown	53
PFS
	Median (months)	16
	95% CI	14 - 19
OS
	Median (months)	57
	95% CI	45 - 65
Total Samples		285

## Sheet: NCI
Supplementary Table 1: Summarized clinical annotations for samples from NCI
Covariate
Age
	Mean (SD)	62 (12)
	Range	26 - 84
Grade
	2	40
	3	145
Residual Disease	Optimal	90
	Sub optimal	95
OS
	Median (months)	46
	95% CI	39 - 58
Total Samples		185

## Sheet: TCGA
Supplementary Table 1: Summarized clinical annotations for samples from TCGA
Covariate
Age
	Mean (SD)	61 (12)
	Range	36 - 87
Stage
	I	2
	II	4
	III	119
	IV	31
	Unknown	1
Grade
	1	7
	2	146
	Unknown	4
Residual Disease
	Nil	28
	1-10 mm	81
	11-20 mm	6
	> 20 mm	24
	Unknown	18
PFS
	Median	16
	95% CI	14-22
OS
	Median	49
	95% CI	42-59
Total samples		157

## Sheet: Norway
Supplementary Table 1: Summarized clinical annotations for samples from Norway
Covariate
Age
	Mean (SD)	60 (10)
	Range	38-81
Stage
	II	6
	III	43
	IV	15
Grade
	1	4
	2	14
	3	46
PFS
	Median	17
	95% CI	15-24
OS
	Median	43
	95% CI	29-57
