# Supplementary material for: Deregulation of MYCN, LIN28B and LET7 in a Molecular Subtype of Aggressive High-Grade Serous Ovarian Cancers
Source: PLoS One. 2011 Apr 13;6(4):e18064. doi: 10.1371/journal.pone.0018064 (PMC3076323; doi:10.1371/journal.pone.0018064)
Supplement: Table S3 — Contingency table HMGA2 protein intensity and molecular subtypes. (XLS) [file pone.0018064.s009.xls]

## Sheet: Contingency_table_IHC
Supplementary Table 3: Contingency table HMGA2 protein intensity and Molecular Subtypes
		Molecular Subtype
		C1	C2	C4	C5
HMGA2 Intensity	0	4 (4)	4 (2)	3 (3)	0 (2)
	1+	5 (6)	5 (4)	6 (4)	0 (3)
	2+	11 (6)	2 (4)	2 (4)	1 (3)
	3+	21 (26)	15 (16)	19 (19)	19 (13)
					Observed (Expected)
