# Supplementary material for: Deregulation of MYCN, LIN28B and LET7 in a Molecular Subtype of Aggressive High-Grade Serous Ovarian Cancers
Source: PLoS One. 2011 Apr 13;6(4):e18064. doi: 10.1371/journal.pone.0018064 (PMC3076323; doi:10.1371/journal.pone.0018064)
Supplement: Table S4 — Genes significantly gained in C5 subtype. (XLS) [file pone.0018064.s010.xls]

## Sheet: genes_differentailly_amplified_
Supplementary Table 4: Genes significantly gained in C5 subtype
geneSymbol	pvals	proportion (C5)	proportion (NonC5)	adj.Pvals
GRHL1	4.57e-12	0.471154	0.13467	4.66e-09
GPR113	1.49e-12	0.461538	0.123209	4.66e-09
KLF11	4.57e-12	0.471154	0.13467	4.66e-09
RHOB	2.84e-12	0.451923	0.120344	4.66e-09
ASXL2	1.58e-12	0.451923	0.117479	4.66e-09
SELI	5.67e-12	0.461538	0.12894	4.66e-09
KIDINS220	1.51e-12	0.480769	0.13467	4.66e-09
LAPTM4A	5.67e-12	0.461538	0.12894	4.66e-09
YWHAQ	1.2e-12	0.490385	0.140401	4.66e-09
HADHB	4.08e-12	0.461538	0.126074	4.66e-09
SDC1	5.67e-12	0.461538	0.12894	4.66e-09
PUM2	5.67e-12	0.461538	0.12894	4.66e-09
ID2	4.57e-12	0.471154	0.13467	4.66e-09
KIF3C	2.99e-12	0.442308	0.114613	4.66e-09
ADD2	5.17e-12	0.394231	0.0888252	4.66e-09
ADAM17	2.35e-12	0.480769	0.137536	4.66e-09
MATN3	5.67e-12	0.461538	0.12894	4.66e-09
NTSR2	5.67e-12	0.461538	0.12894	4.66e-09
FAM49A	5.59e-12	0.432692	0.111748	4.66e-09
TAF1B	7.65e-13	0.490385	0.137536	4.66e-09
IAH1	3.86e-12	0.480769	0.140401	4.66e-09
C2orf39	4.08e-12	0.461538	0.126074	4.66e-09
HADHA	7.87e-12	0.451923	0.123209	6.19e-09
NBAS	1e-11	0.432692	0.114613	7.57e-09
CLEC4F	1.77e-11	0.384615	0.0888252	8e-09
ATP6V1B1	1.77e-11	0.384615	0.0888252	8e-09
C2orf50	1.43e-11	0.461538	0.13467	8e-09
FIGLA	1.77e-11	0.384615	0.0888252	8e-09
ROCK2	1.43e-11	0.461538	0.13467	8e-09
GREB1	1.43e-11	0.461538	0.13467	8e-09
KCNF1	1.67e-11	0.451923	0.12894	8e-09
TEX261	1.77e-11	0.384615	0.0888252	8e-09
LPIN1	1.43e-11	0.461538	0.13467	8e-09
MPHOSPH10	1.77e-11	0.384615	0.0888252	8e-09
ANKRD53	1.77e-11	0.384615	0.0888252	8e-09
PQLC3	1.43e-11	0.461538	0.13467	8e-09
CD207	1.77e-11	0.384615	0.0888252	8e-09
VAX2	1.77e-11	0.384615	0.0888252	8e-09
MCEE	1.77e-11	0.384615	0.0888252	8e-09
WDR35	1.67e-11	0.451923	0.12894	8e-09
ITGB1BP1	1.99e-11	0.471154	0.140401	8.37e-09
MBOAT2	1.99e-11	0.471154	0.140401	8.37e-09
CPSF3	1.99e-11	0.471154	0.140401	8.37e-09
RAB10	2.06e-11	0.442308	0.123209	8.47e-09
RRM2	2.61e-11	0.471154	0.143266	1.03e-08
ASAP2	2.61e-11	0.471154	0.143266	1.03e-08
APOB	2.86e-11	0.432692	0.117479	1.1e-08
TTC32	3.16e-11	0.442308	0.126074	1.19e-08
NAGK	3.33e-11	0.384615	0.0916905	1.23e-08
ATAD2B	3.42e-11	0.413462	0.108883	1.24e-08
LOC285045	3.82e-11	0.471154	0.146132	1.33e-08
DDX1	3.88e-11	0.432692	0.120344	1.33e-08
E2F6	3.82e-11	0.461538	0.137536	1.33e-08
C2orf43	5.12e-11	0.442308	0.12894	1.71e-08
UBXN2A	5.39e-11	0.423077	0.114613	1.77e-08
NT5C1B	5.92e-11	0.432692	0.123209	1.85e-08
TTC27	5.94e-11	0.471154	0.148997	1.85e-08
RDH14	5.92e-11	0.432692	0.123209	1.85e-08
ATP6V1C2	7.28e-11	0.451923	0.13467	2e-08
MYCNOS	7.26e-11	0.423077	0.117479	2e-08
PDIA6	7.28e-11	0.451923	0.13467	2e-08
MYCN	7.26e-11	0.423077	0.117479	2e-08
DTNB	7.26e-11	0.423077	0.117479	2e-08
DNMT3A	7.26e-11	0.423077	0.117479	2e-08
NOL10	7.28e-11	0.451923	0.13467	2e-08
C2orf44	7.26e-11	0.423077	0.117479	2e-08
C2orf18	9.54e-11	0.432692	0.126074	2.5e-08
DPYSL5	9.54e-11	0.432692	0.126074	2.5e-08
OSR1	9.54e-11	0.432692	0.126074	2.5e-08
OTOF	1.1e-10	0.423077	0.120344	2.72e-08
HS1BP3	1.1e-10	0.423077	0.120344	2.72e-08
NCOA1	1.1e-10	0.423077	0.120344	2.72e-08
PAIP2B	1.1e-10	0.375	0.0916905	2.72e-08
NLRC4	1.13e-10	0.461538	0.146132	2.76e-08
POMC	1.35e-10	0.413462	0.114613	3.16e-08
EFR3B	1.35e-10	0.413462	0.114613	3.16e-08
FAM84A	1.35e-10	0.413462	0.114613	3.16e-08
ZNF512	1.8e-10	0.471154	0.154728	3.93e-08
VSNL1	1.76e-10	0.423077	0.123209	3.93e-08
ADCY3	1.76e-10	0.423077	0.123209	3.93e-08
CENPO	1.76e-10	0.423077	0.123209	3.93e-08
C2orf16	1.8e-10	0.471154	0.154728	3.93e-08
C2orf79	1.76e-10	0.423077	0.123209	3.93e-08
ZNF638	2e-10	0.375	0.0945559	4.07e-08
PFN4	2.03e-10	0.413462	0.117479	4.07e-08
SF3B14	2.03e-10	0.413462	0.117479	4.07e-08
FKBP1B	2.03e-10	0.413462	0.117479	4.07e-08
ITSN2	2.03e-10	0.413462	0.117479	4.07e-08
TP53I3	2.03e-10	0.413462	0.117479	4.07e-08
LOC375190	2.03e-10	0.413462	0.117479	4.07e-08
TRIB2	2.12e-10	0.451923	0.143266	4.12e-08
HPCAL1	2.12e-10	0.451923	0.143266	4.12e-08
RASGRP3	2.12e-10	0.451923	0.143266	4.12e-08
ODC1	2.58e-10	0.442308	0.137536	4.83e-08
CENPA	2.59e-10	0.432692	0.12894	4.83e-08
YIPF4	2.56e-10	0.461538	0.148997	4.83e-08
BIRC6	2.56e-10	0.461538	0.148997	4.83e-08
DNAJC27	3.24e-10	0.413462	0.120344	5.8e-08
C2orf70	3.24e-10	0.413462	0.120344	5.8e-08
C2orf84	3.24e-10	0.413462	0.120344	5.8e-08
CIB4	3.24e-10	0.413462	0.120344	5.8e-08
SPAST	3.41e-10	0.461538	0.151862	5.92e-08
DYSF	3.38e-10	0.355769	0.0859599	5.92e-08
SLC30A6	3.41e-10	0.461538	0.151862	5.92e-08
PCYOX1	3.7e-10	0.403846	0.114613	6.32e-08
SNRPG	3.7e-10	0.403846	0.114613	6.32e-08
SRD5A2	3.95e-10	0.442308	0.140401	6.68e-08
LOC100271832	4.81e-10	0.451923	0.146132	7.85e-08
LTBP1	4.81e-10	0.451923	0.146132	7.85e-08
MAPRE3	4.78e-10	0.432692	0.13467	7.85e-08
TMEM214	4.78e-10	0.432692	0.13467	7.85e-08
MEMO1	4.92e-10	0.461538	0.154728	7.95e-08
C2orf42	5.89e-10	0.403846	0.117479	9.43e-08
GEN1	6.16e-10	0.423077	0.12894	9.78e-08
HNRPLL	6.38e-10	0.451923	0.148997	9.86e-08
FAM98A	6.38e-10	0.451923	0.148997	9.86e-08
GALM	6.38e-10	0.451923	0.148997	9.86e-08
AGBL5	7.3e-10	0.432692	0.137536	1.11e-07
PLEKHH2	7.31e-10	0.509615	0.189112	1.11e-07
TGFA	8.26e-10	0.384615	0.106017	1.24e-07
SMC6	8.8e-10	0.423077	0.131805	1.32e-07
MORN2	9.18e-10	0.451923	0.151862	1.34e-07
DHX57	9.18e-10	0.451923	0.151862	1.34e-07
CLIP4	9.18e-10	0.451923	0.151862	1.34e-07
STRN	1.15e-09	0.461538	0.157593	1.64e-07
DPY30	1.15e-09	0.461538	0.157593	1.64e-07
VIT	1.15e-09	0.461538	0.157593	1.64e-07
ATL2	1.18e-09	0.442308	0.146132	1.66e-07
CYP1B1	1.18e-09	0.442308	0.146132	1.66e-07
LOC339788	1.34e-09	0.423077	0.13467	1.86e-07
SOS1	1.44e-09	0.461538	0.160458	1.98e-07
DYNC2LI1	1.63e-09	0.5	0.189112	2.04e-07
TIA1	1.65e-09	0.403846	0.120344	2.04e-07
LRPPRC	1.63e-09	0.5	0.189112	2.04e-07
ABHD1	1.66e-09	0.432692	0.140401	2.04e-07
EMILIN1	1.66e-09	0.432692	0.140401	2.04e-07
KHK	1.66e-09	0.432692	0.140401	2.04e-07
CGREF1	1.66e-09	0.432692	0.140401	2.04e-07
KCNK3	1.65e-09	0.403846	0.120344	2.04e-07
KCNS3	1.61e-09	0.413462	0.12894	2.04e-07
PREB	1.66e-09	0.432692	0.140401	2.04e-07
ABCG5	1.63e-09	0.5	0.189112	2.04e-07
LOC100128731	1.66e-09	0.432692	0.140401	2.04e-07
LOC100133985	1.65e-09	0.403846	0.120344	2.04e-07
ABCG8	1.63e-09	0.5	0.189112	2.04e-07
C2orf53	1.66e-09	0.432692	0.140401	2.04e-07
hCG_1645220	1.63e-09	0.5	0.189112	2.04e-07
FAM82A1	1.7e-09	0.442308	0.148997	2.05e-07
C2orf58	1.7e-09	0.442308	0.148997	2.05e-07
ALK	1.7e-09	0.442308	0.148997	2.05e-07
POLE4	1.92e-09	0.346154	0.0888252	2.3e-07
SUPT7L	1.97e-09	0.461538	0.163324	2.3e-07
MRPL33	1.97e-09	0.461538	0.163324	2.3e-07
GPN1	1.97e-09	0.461538	0.163324	2.3e-07
CCDC121	1.97e-09	0.461538	0.163324	2.3e-07
CAD	2.18e-09	0.432692	0.143266	2.38e-07
PPM1G	2.18e-09	0.432692	0.143266	2.38e-07
SNX17	2.18e-09	0.432692	0.143266	2.38e-07
SFRS7	2.13e-09	0.451923	0.154728	2.38e-07
FEZ2	2.13e-09	0.451923	0.154728	2.38e-07
SLC5A6	2.18e-09	0.432692	0.143266	2.38e-07
PCBP1	2.07e-09	0.403846	0.123209	2.38e-07
EIF2B4	2.18e-09	0.432692	0.143266	2.38e-07
C2orf28	2.18e-09	0.432692	0.143266	2.38e-07
GEMIN6	2.13e-09	0.451923	0.154728	2.38e-07
ZNF513	2.18e-09	0.432692	0.143266	2.38e-07
PPM1B	2.57e-09	0.490385	0.183381	2.79e-07
CCDC75	2.66e-09	0.451923	0.157593	2.85e-07
HEATR5B	2.66e-09	0.451923	0.157593	2.85e-07
DNAJC5G	3.11e-09	0.432692	0.146132	3.11e-07
OXER1	2.96e-09	0.471154	0.17192	3.11e-07
CAPN14	3.05e-09	0.423077	0.137536	3.11e-07
MPV17	3.11e-09	0.432692	0.146132	3.11e-07
GTF3C2	3.11e-09	0.432692	0.146132	3.11e-07
HAAO	2.96e-09	0.471154	0.17192	3.11e-07
UCN	3.11e-09	0.432692	0.146132	3.11e-07
SLC30A3	3.11e-09	0.432692	0.146132	3.11e-07
XDH	3.05e-09	0.423077	0.137536	3.11e-07
EHD3	3.05e-09	0.423077	0.137536	3.11e-07
SRBD1	2.96e-09	0.471154	0.17192	3.11e-07
TRIM54	3.11e-09	0.432692	0.146132	3.11e-07
CYP26B1	3.31e-09	0.336538	0.0859599	3.29e-07
TACR1	3.39e-09	0.346154	0.0916905	3.35e-07
CRIM1	3.63e-09	0.451923	0.160458	3.57e-07
C2orf71	3.93e-09	0.442308	0.151862	3.82e-07
CDC42EP3	3.93e-09	0.442308	0.151862	3.82e-07
SLC3A1	3.96e-09	0.490385	0.189112	3.83e-07
ASPRV1	4.38e-09	0.403846	0.12894	4.22e-07
FBXO11	4.53e-09	0.461538	0.166189	4.33e-07
QPCT	4.88e-09	0.442308	0.154728	4.63e-07
FAM179A	4.88e-09	0.442308	0.154728	4.63e-07
SLC4A1AP	5.46e-09	0.461538	0.169054	5.07e-07
SIX2	5.46e-09	0.461538	0.169054	5.07e-07
SIX3	5.46e-09	0.461538	0.169054	5.07e-07
SGK493	5.46e-09	0.461538	0.169054	5.07e-07
LOC150622	5.56e-09	0.413462	0.13467	5.11e-07
LOC400940	5.56e-09	0.413462	0.13467	5.11e-07
GALNT14	5.64e-09	0.423077	0.143266	5.16e-07
EXOC6B	5.84e-09	0.336538	0.0888252	5.31e-07
SMYD5	5.98e-09	0.365385	0.106017	5.35e-07
RAB11FIP5	5.98e-09	0.365385	0.106017	5.35e-07
FBXO41	5.98e-09	0.365385	0.106017	5.35e-07
PRKD3	6.64e-09	0.442308	0.157593	5.78e-07
SLC8A1	6.64e-09	0.442308	0.157593	5.78e-07
CEBPZ	6.64e-09	0.442308	0.157593	5.78e-07
EIF2AK2	6.64e-09	0.442308	0.157593	5.78e-07
BRE	6.64e-09	0.442308	0.157593	5.78e-07
C2orf56	6.64e-09	0.442308	0.157593	5.78e-07
C2orf3	6.81e-09	0.355769	0.100287	5.87e-07
SUCLG1	6.81e-09	0.355769	0.100287	5.87e-07
THADA	7.22e-09	0.461538	0.17192	6.02e-07
LOC100129726	7.22e-09	0.461538	0.17192	6.02e-07
RNF144A	7.21e-09	0.413462	0.137536	6.02e-07
RSAD2	7.21e-09	0.413462	0.137536	6.02e-07
NRBP1	7.18e-09	0.432692	0.148997	6.02e-07
IFT172	7.18e-09	0.432692	0.148997	6.02e-07
KRTCAP3	7.18e-09	0.432692	0.148997	6.02e-07
C2orf34	7.33e-09	0.480769	0.186246	6.08e-07
WDR43	8.29e-09	0.451923	0.163324	6.82e-07
RBKS	8.29e-09	0.451923	0.163324	6.82e-07
REG3A	8.53e-09	0.346154	0.0945559	6.83e-07
REG1B	8.53e-09	0.346154	0.0945559	6.83e-07
REG1P	8.53e-09	0.346154	0.0945559	6.83e-07
REG1A	8.53e-09	0.346154	0.0945559	6.83e-07
LRRTM4	8.53e-09	0.346154	0.0945559	6.83e-07
REG3G	8.53e-09	0.346154	0.0945559	6.83e-07
MEIS1	8.89e-09	0.432692	0.151862	7.03e-07
FNDC4	8.89e-09	0.432692	0.151862	7.03e-07
LCLAT1	8.89e-09	0.432692	0.151862	7.03e-07
MXD1	1.01e-08	0.403846	0.131805	7.88e-07
SNRNP27	1.01e-08	0.403846	0.131805	7.88e-07
CMPK2	1.02e-08	0.413462	0.140401	7.93e-07
DNAH6	1.05e-08	0.355769	0.103152	8.14e-07
TET3	1.2e-08	0.346154	0.0974212	9.14e-07
SFXN5	1.2e-08	0.346154	0.0974212	9.14e-07
SPR	1.2e-08	0.346154	0.0974212	9.14e-07
EMX1	1.2e-08	0.346154	0.0974212	9.14e-07
GCKR	1.2e-08	0.432692	0.154728	9.16e-07
CAPN13	1.3e-08	0.423077	0.146132	9.66e-07
TTC15	1.3e-08	0.423077	0.146132	9.66e-07
SOX11	1.3e-08	0.403846	0.13467	9.66e-07
ANTXR1	1.3e-08	0.403846	0.13467	9.66e-07
GKN1	1.3e-08	0.403846	0.13467	9.66e-07
GKN2	1.3e-08	0.403846	0.13467	9.66e-07
TRMT61B	1.32e-08	0.451923	0.169054	9.72e-07
LRRTM1	1.51e-08	0.336538	0.0916905	1.11e-06
PREPL	1.56e-08	0.480769	0.189112	1.14e-06
ALMS1P	1.67e-08	0.355769	0.106017	1.17e-06
CCT7	1.67e-08	0.355769	0.106017	1.17e-06
DUSP11	1.67e-08	0.355769	0.106017	1.17e-06
MRPL19	1.67e-08	0.355769	0.106017	1.17e-06
NAT8B	1.67e-08	0.355769	0.106017	1.17e-06
EGR4	1.67e-08	0.355769	0.106017	1.17e-06
NAT8	1.67e-08	0.355769	0.106017	1.17e-06
TPRKB	1.67e-08	0.355769	0.106017	1.17e-06
LBH	1.61e-08	0.423077	0.148997	1.17e-06
C2orf7	1.67e-08	0.355769	0.106017	1.17e-06
FAM176A	1.67e-08	0.355769	0.106017	1.17e-06
GFPT1	1.81e-08	0.394231	0.12894	1.26e-06
HK2	1.83e-08	0.346154	0.100287	1.27e-06
ZFP36L2	1.89e-08	0.461538	0.17765	1.31e-06
YPEL5	2.16e-08	0.423077	0.151862	1.49e-06
GMCL1	2.31e-08	0.394231	0.131805	1.59e-06
RPIA	2.51e-08	0.288462	0.0687679	1.7e-06
EIF2AK3	2.51e-08	0.288462	0.0687679	1.7e-06
C2orf51	2.51e-08	0.288462	0.0687679	1.7e-06
THUMPD2	2.71e-08	0.432692	0.157593	1.83e-06
TMEM178	2.71e-08	0.432692	0.157593	1.83e-06
KLRAQ1	2.87e-08	0.451923	0.17192	1.89e-06
ACTR2	2.88e-08	0.413462	0.146132	1.89e-06
EML4	2.87e-08	0.451923	0.17192	1.89e-06
LHCGR	2.87e-08	0.451923	0.17192	1.89e-06
SPRED2	2.88e-08	0.413462	0.146132	1.89e-06
MTA3	2.87e-08	0.451923	0.17192	1.89e-06
SPDYA	2.87e-08	0.451923	0.17192	1.89e-06
ALMS1	2.9e-08	0.346154	0.103152	1.9e-06
ARHGAP25	3.22e-08	0.394231	0.13467	2.08e-06
APLF	3.22e-08	0.394231	0.13467	2.08e-06
AAK1	3.22e-08	0.394231	0.13467	2.08e-06
BMP10	3.22e-08	0.394231	0.13467	2.08e-06
MSH6	3.25e-08	0.432692	0.160458	2.09e-06
KCNG3	3.4e-08	0.451923	0.174785	2.17e-06
FOXN2	3.4e-08	0.451923	0.174785	2.17e-06
VPS24	3.63e-08	0.326923	0.0916905	2.32e-06
C1D	3.86e-08	0.413462	0.148997	2.43e-06
ETAA1	3.86e-08	0.413462	0.148997	2.43e-06
ALLC	3.86e-08	0.413462	0.148997	2.43e-06
FSHR	4.26e-08	0.432692	0.163324	2.66e-06
KCNK12	4.26e-08	0.432692	0.163324	2.66e-06
COX7A2L	4.38e-08	0.451923	0.17765	2.73e-06
FLJ40330	4.53e-08	0.288462	0.0716332	2.82e-06
KLRC3	4.83e-08	0.586538	0.286533	2.99e-06
KLRC4	4.83e-08	0.586538	0.286533	2.99e-06
TMSB10	4.99e-08	0.336538	0.100287	3.06e-06
LOC129293	4.99e-08	0.336538	0.100287	3.06e-06
STAMBP	5.13e-08	0.355769	0.111748	3.12e-06
TSSC1	5.12e-08	0.403846	0.143266	3.12e-06
RNF103	5.45e-08	0.326923	0.0945559	3.31e-06
KLRK1	5.68e-08	0.586538	0.289398	3.43e-06
KLRD1	5.68e-08	0.586538	0.289398	3.43e-06
MYT1L	5.8e-08	0.423077	0.157593	3.49e-06
FOSL2	5.98e-08	0.461538	0.186246	3.58e-06
EPAS1	6.08e-08	0.442308	0.17192	3.62e-06
FAM182A	6.08e-08	0.442308	0.17192	3.62e-06
RMND5A	6.29e-08	0.317308	0.0888252	3.73e-06
LOC100189589	6.69e-08	0.346154	0.106017	3.93e-06
DCTN1	6.69e-08	0.346154	0.106017	3.93e-06
SEMA4F	6.69e-08	0.346154	0.106017	3.93e-06
PNO1	6.82e-08	0.403846	0.146132	3.98e-06
WDR92	6.82e-08	0.403846	0.146132	3.98e-06
PLEK	7.43e-08	0.394231	0.137536	4.31e-06
NFU1	7.43e-08	0.394231	0.137536	4.31e-06
CLEC2D	7.47e-08	0.596154	0.30086	4.32e-06
KLRG1	7.81e-08	0.567308	0.275072	4.47e-06
CST11	7.81e-08	0.442308	0.174785	4.47e-06
CSTL1	7.81e-08	0.442308	0.174785	4.47e-06
CAB39	8.02e-08	0.288462	0.0744986	4.58e-06
RPS7	8.6e-08	0.413462	0.151862	4.86e-06
ADI1	8.6e-08	0.413462	0.151862	4.86e-06
RNASEH1	8.6e-08	0.413462	0.151862	4.86e-06
DGUOK	8.93e-08	0.346154	0.108883	5.03e-06
ANXA4	9.03e-08	0.394231	0.140401	5.07e-06
ACYP2	9.12e-08	0.432692	0.166189	5.08e-06
C2orf73	9.12e-08	0.432692	0.166189	5.08e-06
TSPYL6	9.12e-08	0.432692	0.166189	5.08e-06
CEP68	1.03e-07	0.413462	0.154728	5.66e-06
RAB1A	1.03e-07	0.413462	0.154728	5.66e-06
COLEC11	1.03e-07	0.413462	0.154728	5.66e-06
STYK1	1.05e-07	0.576923	0.286533	5.75e-06
SPTBN1	1.08e-07	0.432692	0.169054	5.8e-06
PRKCE	1.06e-07	0.451923	0.183381	5.8e-06
RPL23AP32	1.08e-07	0.432692	0.169054	5.8e-06
PSME4	1.08e-07	0.432692	0.169054	5.8e-06
MAP4K3	1.08e-07	0.432692	0.169054	5.8e-06
GPR75	1.08e-07	0.432692	0.169054	5.8e-06
EML6	1.08e-07	0.432692	0.169054	5.8e-06
CLEC7A	1.15e-07	0.586538	0.295129	6.07e-06
GABARAPL1	1.15e-07	0.586538	0.295129	6.07e-06
OLR1	1.15e-07	0.586538	0.295129	6.07e-06
CLEC1A	1.15e-07	0.586538	0.295129	6.07e-06
CLEC12B	1.15e-07	0.586538	0.295129	6.07e-06
C12orf59	1.15e-07	0.586538	0.295129	6.07e-06
CTNNA2	1.17e-07	0.336538	0.103152	6.12e-06
MOGS	1.17e-07	0.336538	0.103152	6.12e-06
INO80B	1.17e-07	0.336538	0.103152	6.12e-06
WBP1	1.17e-07	0.336538	0.103152	6.12e-06
CNRIP1	1.2e-07	0.394231	0.143266	6.24e-06
SLC4A5	1.29e-07	0.346154	0.111748	6.61e-06
CLECL1	1.28e-07	0.596154	0.303725	6.61e-06
MTHFD2	1.29e-07	0.346154	0.111748	6.61e-06
ACTG2	1.29e-07	0.346154	0.111748	6.61e-06
CD69	1.28e-07	0.596154	0.303725	6.61e-06
CD8B	1.33e-07	0.278846	0.0716332	6.79e-06
PXDN	1.33e-07	0.413462	0.157593	6.79e-06
EPCAM	1.38e-07	0.432692	0.17192	6.99e-06
MSH2	1.38e-07	0.432692	0.17192	6.99e-06
CRIPT	1.38e-07	0.432692	0.17192	6.99e-06
PTPRO	1.42e-07	0.557692	0.272206	7.13e-06
STRAP	1.42e-07	0.557692	0.272206	7.13e-06
EPS8	1.42e-07	0.557692	0.272206	7.13e-06
A2M	1.44e-07	0.567308	0.277937	7.21e-06
LOC144571	1.44e-07	0.567308	0.277937	7.21e-06
TTC31	1.54e-07	0.336538	0.106017	7.59e-06
RTKN	1.54e-07	0.336538	0.106017	7.59e-06
MRPL53	1.54e-07	0.336538	0.106017	7.59e-06
WDR54	1.54e-07	0.336538	0.106017	7.59e-06
C2orf81	1.54e-07	0.336538	0.106017	7.59e-06
CCDC142	1.54e-07	0.336538	0.106017	7.59e-06
RP11-218C14.6	1.59e-07	0.442308	0.17765	7.75e-06
CST8	1.59e-07	0.442308	0.17765	7.75e-06
CST9L	1.59e-07	0.442308	0.17765	7.75e-06
RTN4	1.61e-07	0.423077	0.163324	7.77e-06
ERLEC1	1.61e-07	0.423077	0.163324	7.77e-06
CHAC2	1.61e-07	0.423077	0.163324	7.77e-06
PLB1	1.76e-07	0.461538	0.194842	8.48e-06
FANCL	1.8e-07	0.403846	0.151862	8.63e-06
CCDC85A	1.8e-07	0.403846	0.151862	8.63e-06
TAS2R50	1.84e-07	0.576923	0.289398	8.7e-06
KLRA1	1.84e-07	0.576923	0.289398	8.7e-06
MAGOHB	1.84e-07	0.576923	0.289398	8.7e-06
TAS2R7	1.84e-07	0.576923	0.289398	8.7e-06
TAS2R8	1.84e-07	0.576923	0.289398	8.7e-06
ASB3	1.89e-07	0.423077	0.166189	8.9e-06
EFEMP1	1.89e-07	0.423077	0.166189	8.9e-06
PZP	1.9e-07	0.567308	0.283668	8.9e-06
SLC1A4	1.89e-07	0.423077	0.166189	8.9e-06
TAS2R19	2.08e-07	0.576923	0.292264	9.6e-06
CSDA	2.08e-07	0.576923	0.292264	9.6e-06
PRR4	2.08e-07	0.576923	0.292264	9.6e-06
TAS2R14	2.08e-07	0.576923	0.292264	9.6e-06
TAS2R13	2.08e-07	0.576923	0.292264	9.6e-06
TAS2R10	2.08e-07	0.576923	0.292264	9.6e-06
CLEC12A	2.14e-07	0.586538	0.297994	9.81e-06
CLEC1B	2.14e-07	0.586538	0.297994	9.81e-06
C2orf65	2.21e-07	0.336538	0.108883	9.84e-06
HTRA2	2.21e-07	0.336538	0.108883	9.84e-06
TLX2	2.21e-07	0.336538	0.108883	9.84e-06
PCGF1	2.21e-07	0.336538	0.108883	9.84e-06
DOK1	2.21e-07	0.336538	0.108883	9.84e-06
KCMF1	2.21e-07	0.336538	0.108883	9.84e-06
AUP1	2.21e-07	0.336538	0.108883	9.84e-06
TCF7L1	2.21e-07	0.336538	0.108883	9.84e-06
LOXL3	2.21e-07	0.336538	0.108883	9.84e-06
SMYD1	2.19e-07	0.269231	0.0687679	9.84e-06
DQX1	2.21e-07	0.336538	0.108883	9.84e-06
hCG_1811732	2.21e-07	0.336538	0.108883	9.84e-06
PTMA	2.3e-07	0.278846	0.0744986	1.02e-05
SERTAD2	2.32e-07	0.403846	0.154728	1.02e-05
TPO	2.32e-07	0.403846	0.154728	1.02e-05
KLRB1	2.31e-07	0.586538	0.30086	1.02e-05
KLRF1	2.31e-07	0.586538	0.30086	1.02e-05
C2orf57	2.3e-07	0.278846	0.0744986	1.02e-05
ARHGDIB	2.57e-07	0.557692	0.275072	1.12e-05
MGP	2.57e-07	0.557692	0.275072	1.12e-05
DERA	2.57e-07	0.557692	0.275072	1.12e-05
ERP27	2.57e-07	0.557692	0.275072	1.12e-05
CLEC2B	2.66e-07	0.586538	0.303725	1.15e-05
ATOH8	2.66e-07	0.326923	0.103152	1.15e-05
PPP3R1	2.65e-07	0.394231	0.146132	1.15e-05
ATP6V1E2	2.78e-07	0.432692	0.174785	1.18e-05
NRXN1	2.81e-07	0.413462	0.160458	1.18e-05
RHOQ	2.78e-07	0.432692	0.174785	1.18e-05
SMEK2	2.81e-07	0.413462	0.160458	1.18e-05
RPS27A	2.81e-07	0.413462	0.160458	1.18e-05
MTIF2	2.81e-07	0.413462	0.160458	1.18e-05
PIGF	2.78e-07	0.432692	0.174785	1.18e-05
SOCS5	2.78e-07	0.432692	0.174785	1.18e-05
CCDC104	2.81e-07	0.413462	0.160458	1.18e-05
PNPT1	2.81e-07	0.413462	0.160458	1.18e-05
C2orf63	2.81e-07	0.413462	0.160458	1.18e-05
M6PR	2.87e-07	0.557692	0.277937	1.19e-05
ART4	2.87e-07	0.557692	0.277937	1.19e-05
WBP11	2.87e-07	0.557692	0.277937	1.19e-05
H2AFJ	2.87e-07	0.557692	0.277937	1.19e-05
C12orf60	2.87e-07	0.557692	0.277937	1.19e-05
C12orf69	2.87e-07	0.557692	0.277937	1.19e-05
TRIM43	3.08e-07	0.346154	0.114613	1.27e-05
MOBKL1B	3.08e-07	0.346154	0.114613	1.27e-05
PPP1CB	3.08e-07	0.451923	0.191977	1.27e-05
BOLA3	3.08e-07	0.346154	0.114613	1.27e-05
AFTPH	3.13e-07	0.394231	0.148997	1.28e-05
CD8A	3.17e-07	0.288462	0.0802292	1.3e-05
CST9	3.27e-07	0.432692	0.17765	1.33e-05
CST3	3.27e-07	0.432692	0.17765	1.33e-05
CDKN1B	3.41e-07	0.557692	0.280802	1.38e-05
PHC1	3.41e-07	0.557692	0.280802	1.38e-05
DDX47	3.41e-07	0.557692	0.280802	1.38e-05
APOLD1	3.41e-07	0.557692	0.280802	1.38e-05
B3GNT7	3.8e-07	0.269231	0.0716332	1.49e-05
C2orf52	3.8e-07	0.269231	0.0716332	1.49e-05
C2orf72	3.8e-07	0.269231	0.0716332	1.49e-05
NCL	3.8e-07	0.269231	0.0716332	1.49e-05
FABP1	3.8e-07	0.269231	0.0716332	1.49e-05
PRB3	3.78e-07	0.576923	0.295129	1.49e-05
CACNA1C	3.72e-07	0.567308	0.289398	1.49e-05
PRB4	3.78e-07	0.576923	0.295129	1.49e-05
KRCC1	3.8e-07	0.269231	0.0716332	1.49e-05
ITM2C	3.8e-07	0.269231	0.0716332	1.49e-05
TAS2R9	3.78e-07	0.576923	0.295129	1.49e-05
GPR55	3.8e-07	0.269231	0.0716332	1.49e-05
LOC374443	3.78e-07	0.576923	0.295129	1.49e-05
VRK2	4.02e-07	0.394231	0.151862	1.57e-05
HSPC159	4.02e-07	0.394231	0.151862	1.57e-05
CST1	4.13e-07	0.432692	0.180516	1.61e-05
CST4	4.13e-07	0.432692	0.180516	1.61e-05
A2ML1	4.51e-07	0.548077	0.272206	1.75e-05
IMMT	4.55e-07	0.317308	0.100287	1.75e-05
REEP1	4.55e-07	0.317308	0.100287	1.75e-05
MFAP5	4.51e-07	0.548077	0.272206	1.75e-05
MRPL35	4.55e-07	0.317308	0.100287	1.75e-05
RIMKLB	4.51e-07	0.548077	0.272206	1.75e-05
C2orf61	4.83e-07	0.423077	0.17192	1.84e-05
MCFD2	4.83e-07	0.423077	0.17192	1.84e-05
TTC7A	4.83e-07	0.423077	0.17192	1.84e-05
SNTG2	4.87e-07	0.403846	0.157593	1.85e-05
TMEM18	4.87e-07	0.403846	0.157593	1.85e-05
NCRNA00117	4.87e-07	0.403846	0.157593	1.85e-05
PDE6H	5.07e-07	0.548077	0.275072	1.92e-05
HTR7P	5.07e-07	0.548077	0.275072	1.92e-05
PROM2	5.33e-07	0.336538	0.111748	1.99e-05
KCNIP3	5.33e-07	0.336538	0.111748	1.99e-05
MAL	5.33e-07	0.336538	0.111748	1.99e-05
MRPS5	5.33e-07	0.336538	0.111748	1.99e-05
ZNF514	5.33e-07	0.336538	0.111748	1.99e-05
GGTLC1	5.36e-07	0.442308	0.189112	2e-05
PDE6D	5.4e-07	0.278846	0.0773639	2.01e-05
CALM2	5.67e-07	0.423077	0.174785	2.1e-05
FAM182B	5.67e-07	0.423077	0.174785	2.1e-05
CCDC88A	5.71e-07	0.403846	0.160458	2.11e-05
VPS54	5.71e-07	0.403846	0.160458	2.11e-05
THNSL2	6.22e-07	0.259615	0.0687679	2.28e-05
NPPC	6.22e-07	0.259615	0.0687679	2.28e-05
DIS3L2	6.22e-07	0.259615	0.0687679	2.28e-05
KDM3A	6.38e-07	0.317308	0.103152	2.32e-05
PTCD3	6.38e-07	0.317308	0.103152	2.32e-05
POLR1A	6.38e-07	0.317308	0.103152	2.32e-05
LOC90784	6.38e-07	0.317308	0.103152	2.32e-05
FAHD2A	6.49e-07	0.336538	0.114613	2.35e-05
LRRK2	6.49e-07	0.336538	0.114613	2.35e-05
TSPAN9	6.62e-07	0.567308	0.292264	2.38e-05
GPR19	6.59e-07	0.557692	0.286533	2.38e-05
DCP1B	6.62e-07	0.567308	0.292264	2.38e-05
VSX1	6.73e-07	0.442308	0.191977	2.42e-05
NINL	7.06e-07	0.451923	0.197708	2.53e-05
UGP2	7.21e-07	0.403846	0.163324	2.57e-05
C2orf86	7.21e-07	0.403846	0.163324	2.57e-05
OTX1	7.21e-07	0.403846	0.163324	2.57e-05
TEAD4	7.26e-07	0.567308	0.295129	2.58e-05
CST2	7.83e-07	0.432692	0.183381	2.78e-05
TULP3	8.44e-07	0.567308	0.297994	3e-05
AICDA	8.87e-07	0.538462	0.272206	3.14e-05
TGOLN2	9.19e-07	0.326923	0.108883	3.19e-05
PSMD1	9.17e-07	0.269231	0.0744986	3.19e-05
SP100	9.17e-07	0.269231	0.0744986	3.19e-05
ST3GAL5	9.19e-07	0.326923	0.108883	3.19e-05
GNLY	9.19e-07	0.326923	0.108883	3.19e-05
HTR2B	9.17e-07	0.269231	0.0744986	3.19e-05
SP140L	9.17e-07	0.269231	0.0744986	3.19e-05
COPS7B	9.17e-07	0.269231	0.0744986	3.19e-05
NMUR1	9.17e-07	0.269231	0.0744986	3.19e-05
SPATA3	9.17e-07	0.269231	0.0744986	3.19e-05
CST5	9.22e-07	0.432692	0.186246	3.2e-05
KIAA1467	9.3e-07	0.548077	0.277937	3.21e-05
HEBP1	9.3e-07	0.548077	0.277937	3.21e-05
GSG1	9.3e-07	0.548077	0.277937	3.21e-05
PELI1	9.79e-07	0.394231	0.157593	3.37e-05
GPRC5A	1e-06	0.548077	0.280802	3.44e-05
GPRC5D	1e-06	0.548077	0.280802	3.44e-05
SFTPB	1.11e-06	0.326923	0.111748	3.78e-05
ZNF2	1.11e-06	0.326923	0.111748	3.78e-05
CREBL2	1.15e-06	0.557692	0.289398	3.88e-05
PRMT8	1.15e-06	0.557692	0.289398	3.88e-05
MANSC1	1.15e-06	0.557692	0.289398	3.88e-05
LOH12CR1	1.15e-06	0.557692	0.289398	3.88e-05
LOH12CR2	1.15e-06	0.557692	0.289398	3.88e-05
ERC1	1.18e-06	0.605769	0.332378	3.97e-05
ZNF337	1.21e-06	0.442308	0.194842	4.07e-05
NANP	1.21e-06	0.442308	0.194842	4.07e-05
RAD52	1.25e-06	0.605769	0.335244	4.19e-05
DUSP16	1.26e-06	0.557692	0.292264	4.23e-05
LRTM2	1.26e-06	0.557692	0.292264	4.23e-05
SP140	1.28e-06	0.269231	0.0773639	4.25e-05
SP110	1.28e-06	0.269231	0.0773639	4.25e-05
ARMC9	1.28e-06	0.269231	0.0773639	4.25e-05
ARID2	1.39e-06	0.346154	0.126074	4.61e-05
FOXM1	1.4e-06	0.567308	0.30086	4.64e-05
C12orf32	1.4e-06	0.567308	0.30086	4.64e-05
MDH1	1.42e-06	0.403846	0.166189	4.68e-05
EHBP1	1.42e-06	0.403846	0.166189	4.68e-05
TMEM90B	1.43e-06	0.442308	0.197708	4.71e-05
ACSS1	1.43e-06	0.442308	0.197708	4.71e-05
VAMP8	1.46e-06	0.326923	0.114613	4.74e-05
VAMP5	1.46e-06	0.326923	0.114613	4.74e-05
USP39	1.46e-06	0.326923	0.114613	4.74e-05
C2orf68	1.46e-06	0.326923	0.114613	4.74e-05
RNF181	1.46e-06	0.326923	0.114613	4.74e-05
TMEM150A	1.46e-06	0.326923	0.114613	4.74e-05
GRIN2B	1.53e-06	0.528846	0.269341	4.98e-05
NAPB	1.57e-06	0.423077	0.183381	5.08e-05
PRB1	1.58e-06	0.567308	0.303725	5.08e-05
NXT1	1.57e-06	0.423077	0.183381	5.08e-05
GZF1	1.57e-06	0.423077	0.183381	5.08e-05
ATF7IP	1.59e-06	0.538462	0.275072	5.11e-05
CLEC4E	1.59e-06	0.538462	0.275072	5.11e-05
KDM5A	1.7e-06	0.576923	0.312321	5.45e-05
EMP1	1.73e-06	0.538462	0.277937	5.5e-05
GUCY2C	1.73e-06	0.538462	0.277937	5.5e-05
PLBD1	1.73e-06	0.538462	0.277937	5.5e-05
RERG	1.73e-06	0.538462	0.277937	5.5e-05
NACA	1.8e-06	0.298077	0.0974212	5.73e-05
NINJ2	1.95e-06	0.576923	0.315186	6.18e-05
MAT2A	2.01e-06	0.336538	0.120344	6.36e-05
GGCX	2.01e-06	0.336538	0.120344	6.36e-05
RETSAT	2.03e-06	0.326923	0.117479	6.4e-05
C20orf3	2.06e-06	0.432692	0.191977	6.46e-05
CST7	2.06e-06	0.432692	0.191977	6.46e-05
FBXO36	2.13e-06	0.259615	0.0744986	6.59e-05
B4GALNT1	2.13e-06	0.259615	0.0744986	6.59e-05
KIF5A	2.13e-06	0.259615	0.0744986	6.59e-05
SLC26A10	2.13e-06	0.259615	0.0744986	6.59e-05
PIP4K2C	2.13e-06	0.259615	0.0744986	6.59e-05
DTX3	2.13e-06	0.259615	0.0744986	6.59e-05
DNER	2.13e-06	0.259615	0.0744986	6.59e-05
SLC16A14	2.13e-06	0.259615	0.0744986	6.59e-05
GINS1	2.15e-06	0.451923	0.209169	6.64e-05
FOXA2	2.27e-06	0.413462	0.17765	6.99e-05
C20orf56	2.27e-06	0.413462	0.17765	6.99e-05
SLC2A13	2.35e-06	0.336538	0.123209	7.23e-05
BCL11A	2.4e-06	0.394231	0.163324	7.36e-05
FKBP4	2.41e-06	0.557692	0.297994	7.36e-05
EFCAB4B	2.41e-06	0.557692	0.297994	7.36e-05
ITFG2	2.41e-06	0.557692	0.297994	7.36e-05
PRIM1	2.61e-06	0.298077	0.100287	7.95e-05
CACNA2D4	2.72e-06	0.557692	0.30086	8.22e-05
CLEC4D	2.7e-06	0.528846	0.272206	8.22e-05
PARP11	2.72e-06	0.557692	0.30086	8.22e-05
LOC284798	2.72e-06	0.442308	0.200573	8.22e-05
FAM66C	2.7e-06	0.528846	0.272206	8.22e-05
NRIP2	2.72e-06	0.557692	0.30086	8.22e-05
CCDC77	2.92e-06	0.567308	0.309456	8.82e-05
SFRS2IP	2.98e-06	0.336538	0.126074	8.99e-05
PLGLB2	3.15e-06	0.259615	0.0773639	9.32e-05
OS9	3.15e-06	0.259615	0.0773639	9.32e-05
DCTN2	3.15e-06	0.259615	0.0773639	9.32e-05
MARS	3.15e-06	0.259615	0.0773639	9.32e-05
TRIP12	3.15e-06	0.259615	0.0773639	9.32e-05
GLI1	3.15e-06	0.259615	0.0773639	9.32e-05
INHBC	3.15e-06	0.259615	0.0773639	9.32e-05
INHBE	3.15e-06	0.259615	0.0773639	9.32e-05
ARHGAP9	3.15e-06	0.259615	0.0773639	9.32e-05
MBD6	3.15e-06	0.259615	0.0773639	9.32e-05
TWF1	3.17e-06	0.307692	0.106017	9.36e-05
FOXJ2	3.34e-06	0.538462	0.283668	9.82e-05
NECAP1	3.34e-06	0.538462	0.283668	9.82e-05
C3AR1	3.34e-06	0.538462	0.283668	9.82e-05
ADAMTS20	3.38e-06	0.317308	0.114613	9.92e-05
PDZRN4	3.38e-06	0.317308	0.114613	9.92e-05
PID1	3.53e-06	0.25	0.0716332	0.000103432
ENTPD6	3.62e-06	0.442308	0.206304	0.00010588
SLC6A13	3.71e-06	0.538462	0.286533	0.000108242
NANOG	3.71e-06	0.538462	0.286533	0.000108242
LOC389634	3.89e-06	0.480769	0.234957	0.00011322
RACGAP1P	3.95e-06	0.326923	0.120344	0.00011463
ANO6	3.95e-06	0.326923	0.120344	0.00011463
HSD17B6	4.31e-06	0.288462	0.0974212	0.000124817
ARL4C	4.42e-06	0.240385	0.0659026	0.000127512
SH3BP4	4.42e-06	0.240385	0.0659026	0.000127512
ACP1	4.46e-06	0.403846	0.17765	0.000128389
FAM150B	4.46e-06	0.403846	0.17765	0.000128389
hCG_2014417	4.81e-06	0.259615	0.0802292	0.000134765
AVIL	4.81e-06	0.259615	0.0802292	0.000134765
CDK4	4.81e-06	0.259615	0.0802292	0.000134765
TSPAN31	4.81e-06	0.259615	0.0802292	0.000134765
CTDSP2	4.81e-06	0.259615	0.0802292	0.000134765
R3HDM2	4.81e-06	0.259615	0.0802292	0.000134765
METTL1	4.81e-06	0.259615	0.0802292	0.000134765
CYP27B1	4.81e-06	0.259615	0.0802292	0.000134765
AGAP2	4.81e-06	0.259615	0.0802292	0.000134765
TSFM	4.81e-06	0.259615	0.0802292	0.000134765
FAM119B	4.81e-06	0.259615	0.0802292	0.000134765
SHMT2	4.81e-06	0.259615	0.0802292	0.000134765
NDUFA4L2	4.81e-06	0.259615	0.0802292	0.000134765
NXPH4	4.81e-06	0.259615	0.0802292	0.000134765
2009-03-01	4.81e-06	0.259615	0.0802292	0.000134765
LOC285074	4.81e-06	0.259615	0.0802292	0.000134765
STAC3	4.81e-06	0.259615	0.0802292	0.000134765
BCL2L14	4.97e-06	0.557692	0.30659	0.000138731
LRP6	4.97e-06	0.557692	0.30659	0.000138731
ELMOD3	4.98e-06	0.326923	0.123209	0.000138891
B4GALNT3	5.06e-06	0.567308	0.312321	0.000140823
EFHD1	5.17e-06	0.25	0.0744986	0.000143648
LOC284788	5.24e-06	0.413462	0.183381	0.000145097
THBD	5.24e-06	0.413462	0.183381	0.000145097
SSTR4	5.24e-06	0.413462	0.183381	0.000145097
BAZ2A	5.61e-06	0.307692	0.111748	0.00015416
IRAK4	5.61e-06	0.307692	0.111748	0.00015416
PUS7L	5.61e-06	0.307692	0.111748	0.00015416
TMEM117	5.61e-06	0.307692	0.111748	0.00015416
CD93	5.78e-06	0.413462	0.186246	0.000158742
FBXL14	5.83e-06	0.576923	0.323782	0.000159786
XRCC6BP1	6.21e-06	0.269231	0.0859599	0.000170064
SLC6A12	6.26e-06	0.528846	0.283668	0.000170819
CLEC4A	6.26e-06	0.528846	0.283668	0.000170819
CLEC4C	6.36e-06	0.538462	0.289398	0.000171623
KCNA6	6.36e-06	0.538462	0.289398	0.000171623
TMEM17	6.36e-06	0.394231	0.17192	0.000171623
APOBEC1	6.36e-06	0.538462	0.289398	0.000171623
KCNA1	6.36e-06	0.538462	0.289398	0.000171623
GDF3	6.36e-06	0.538462	0.289398	0.000171623
DPPA3	6.36e-06	0.538462	0.289398	0.000171623
DEFB118	6.32e-06	0.576923	0.326648	0.000171623
ABCD2	6.51e-06	0.336538	0.12894	0.00017449
SLC38A2	6.51e-06	0.336538	0.12894	0.00017449
SLC38A1	6.51e-06	0.336538	0.12894	0.00017449
CPNE8	6.51e-06	0.336538	0.12894	0.00017449
DEFB122	6.7e-06	0.586538	0.335244	0.000179087
DEFB121	6.7e-06	0.586538	0.335244	0.000179087
PTGES3	6.8e-06	0.298077	0.106017	0.000181512
SLC2A3	6.86e-06	0.538462	0.292264	0.000182389
C12orf35	6.86e-06	0.538462	0.292264	0.000182389
ANO2	6.86e-06	0.538462	0.292264	0.000182389
ALG10	7.26e-06	0.442308	0.212034	0.000192349
ABHD12	7.26e-06	0.442308	0.212034	0.000192349
COMMD1	7.42e-06	0.394231	0.174785	0.00019601
DEFB123	7.42e-06	0.586538	0.338109	0.00019601
AKAP3	7.58e-06	0.548077	0.30086	0.000199004
FGF6	7.58e-06	0.548077	0.30086	0.000199004
NDUFA9	7.58e-06	0.548077	0.30086	0.000199004
RIN2	7.55e-06	0.423077	0.194842	0.000199004
NTF3	7.8e-06	0.538462	0.295129	0.000203898
KCNA5	7.8e-06	0.538462	0.295129	0.000203898
IFT52	7.8e-06	0.538462	0.295129	0.000203898
TPX2	8.01e-06	0.605769	0.355301	0.000209194
FAM186A	8.26e-06	0.269231	0.0888252	0.000215248
RAD51AP1	8.34e-06	0.548077	0.303725	0.000216335
DYRK4	8.34e-06	0.548077	0.303725	0.000216335
C12orf4	8.34e-06	0.548077	0.303725	0.000216335
FGF23	8.34e-06	0.548077	0.303725	0.000216335
LOC100130264	8.45e-06	0.423077	0.197708	0.000218256
INPP5D	8.46e-06	0.240385	0.0716332	0.000218256
SLC24A3	8.45e-06	0.423077	0.197708	0.000218256
B3GNT2	8.69e-06	0.403846	0.180516	0.000223879
BCL2L1	8.8e-06	0.605769	0.358166	0.000226529
ATP5B	9.23e-06	0.298077	0.108883	0.000237262
PIK3C2G	9.32e-06	0.519231	0.277937	0.000239142
CHRND	9.66e-06	0.230769	0.0659026	0.000245573
ALPI	9.66e-06	0.230769	0.0659026	0.000245573
ALPPL2	9.66e-06	0.230769	0.0659026	0.000245573
HJURP	9.66e-06	0.230769	0.0659026	0.000245573
ECEL1	9.66e-06	0.230769	0.0659026	0.000245573
CHRNG	9.66e-06	0.230769	0.0659026	0.000245573
UGT1A1	9.66e-06	0.230769	0.0659026	0.000245573
LRP1	1.03e-05	0.259615	0.0830946	0.000260759
STAT6	1.03e-05	0.259615	0.0830946	0.000260759
CCNT1	1.03e-05	0.259615	0.0830946	0.000260759
NAB2	1.03e-05	0.259615	0.0830946	0.000260759
AGFG1	1.03e-05	0.259615	0.0830946	0.000260759
LOC144438	1.03e-05	0.259615	0.0830946	0.000260759
DEFB119	1.06e-05	0.576923	0.329513	0.000266207
WNT5B	1.06e-05	0.576923	0.329513	0.000266207
SNRNP200	1.1e-05	0.307692	0.114613	0.000273298
CIAO1	1.1e-05	0.307692	0.114613	0.000273298
TMEM127	1.1e-05	0.307692	0.114613	0.000273298
LOC729234	1.1e-05	0.307692	0.114613	0.000273298
GPAT2	1.1e-05	0.307692	0.114613	0.000273298
LOC285033	1.1e-05	0.307692	0.114613	0.000273298
ITPRIPL1	1.1e-05	0.307692	0.114613	0.000273298
ADIPOR2	1.12e-05	0.576923	0.332378	0.000278152
COMMD7	1.12e-05	0.576923	0.332378	0.000278152
LARP4	1.16e-05	0.269231	0.0916905	0.000287895
WNK1	1.19e-05	0.586538	0.340974	0.000294961
REL	1.22e-05	0.384615	0.17192	0.000302402
C12orf40	1.23e-05	0.326923	0.12894	0.000304417
CAPG	1.23e-05	0.326923	0.12894	0.000304417
LOC284805	1.25e-05	0.576923	0.335244	0.000306218
DNMT3B	1.25e-05	0.576923	0.335244	0.000306218
PDRG1	1.27e-05	0.596154	0.34957	0.000312893
C20orf112	1.29e-05	0.586538	0.34384	0.000315994
ID1	1.34e-05	0.596154	0.352436	0.000327248
DUSP15	1.34e-05	0.596154	0.352436	0.000327248
TTLL9	1.34e-05	0.596154	0.352436	0.000327248
RBMS2	1.36e-05	0.307692	0.117479	0.000331469
NCAPH	1.36e-05	0.307692	0.117479	0.000331469
TIGD1	1.38e-05	0.230769	0.0687679	0.000333465
GIGYF2	1.38e-05	0.230769	0.0687679	0.000333465
ALPP	1.38e-05	0.230769	0.0687679	0.000333465
EIF4E2	1.38e-05	0.230769	0.0687679	0.000333465
TRPM8	1.38e-05	0.230769	0.0687679	0.000333465
CD163	1.39e-05	0.538462	0.30086	0.000333755
GALNT8	1.39e-05	0.538462	0.30086	0.000333755
SPSB2	1.39e-05	0.548077	0.30659	0.000333755
TOX2	1.39e-05	0.548077	0.30659	0.000333755
PTPRT	1.44e-05	0.509615	0.272206	0.000345925
SLC4A8	1.47e-05	0.278846	0.0974212	0.000349945
ATN1	1.49e-05	0.548077	0.309456	0.000349945
SCN8A	1.47e-05	0.278846	0.0974212	0.000349945
ENO2	1.49e-05	0.548077	0.309456	0.000349945
PHB2	1.49e-05	0.548077	0.309456	0.000349945
VWF	1.49e-05	0.548077	0.309456	0.000349945
LRRC23	1.49e-05	0.548077	0.309456	0.000349945
PTPN6	1.49e-05	0.548077	0.309456	0.000349945
XRCC5	1.47e-05	0.278846	0.0974212	0.000349945
RPL13P5	1.49e-05	0.548077	0.309456	0.000349945
C12orf5	1.49e-05	0.548077	0.309456	0.000349945
C12orf57	1.49e-05	0.548077	0.309456	0.000349945
TMEM169	1.47e-05	0.278846	0.0974212	0.000349945
FOXS1	1.48e-05	0.596154	0.355301	0.000349945
MYLK2	1.48e-05	0.596154	0.355301	0.000349945
COX4I2	1.48e-05	0.596154	0.355301	0.000349945
SH2D6	1.52e-05	0.326923	0.131805	0.000356117
MGST1	1.72e-05	0.509615	0.277937	0.000402172
RDH16	1.72e-05	0.25	0.0802292	0.000402172
RERGL	1.72e-05	0.509615	0.277937	0.000402172
JPH2	1.76e-05	0.557692	0.320917	0.000408984
CD9	1.76e-05	0.557692	0.320917	0.000408984
C20orf111	1.76e-05	0.557692	0.320917	0.000408984
GDAP1L1	1.76e-05	0.557692	0.320917	0.000408984
EMILIN3	1.77e-05	0.480769	0.252149	0.000411333
LPIN3	1.77e-05	0.480769	0.252149	0.000411333
DUSP2	1.81e-05	0.298077	0.111748	0.000420165
ADRA2B	1.81e-05	0.298077	0.111748	0.000420165
BIN2	1.85e-05	0.278846	0.100287	0.000425883
GALNT6	1.85e-05	0.278846	0.100287	0.000425883
CELA1	1.85e-05	0.278846	0.100287	0.000425883
CCND2	1.87e-05	0.519231	0.286533	0.000431893
SDR9C7	1.89e-05	0.259615	0.0888252	0.000434464
NEUROD4	1.89e-05	0.259615	0.0888252	0.000434464
C12orf41	1.89e-05	0.259615	0.0888252	0.000434464
PKIG	1.96e-05	0.576923	0.338109	0.000450381
CHD6	2.02e-05	0.480769	0.255014	0.000462127
KIF21A	2.03e-05	0.317308	0.126074	0.00046445
SAG	2.06e-05	0.230769	0.0716332	0.000466695
DGKD	2.06e-05	0.230769	0.0716332	0.000466695
KCNJ13	2.06e-05	0.230769	0.0716332	0.000466695
NEU2	2.06e-05	0.230769	0.0716332	0.000466695
USP40	2.06e-05	0.230769	0.0716332	0.000466695
NGEF	2.06e-05	0.230769	0.0716332	0.000466695
C2orf82	2.06e-05	0.230769	0.0716332	0.000466695
PLAGL2	2.09e-05	0.586538	0.346705	0.000472673
ASXL1	2.09e-05	0.586538	0.346705	0.000472673
TSPYL3	2.09e-05	0.586538	0.346705	0.000472673
PYGB	2.16e-05	0.432692	0.212034	0.000486776
STARD7	2.23e-05	0.298077	0.114613	0.000497894
NELL2	2.23e-05	0.298077	0.114613	0.000497894
KIF3B	2.21e-05	0.586538	0.34957	0.000497894
POFUT1	2.21e-05	0.586538	0.34957	0.000497894
MYO1A	2.22e-05	0.25	0.0830946	0.000497894
TMEM194A	2.22e-05	0.25	0.0830946	0.000497894
MFF	2.22e-05	0.25	0.0830946	0.000497894
TM4SF20	2.22e-05	0.25	0.0830946	0.000497894
MYBL2	2.26e-05	0.538462	0.303725	0.000502089
GNB3	2.26e-05	0.538462	0.303725	0.000502089
CDCA3	2.26e-05	0.538462	0.303725	0.000502089
AMN1	2.26e-05	0.538462	0.303725	0.000502089
GTSF1L	2.26e-05	0.538462	0.303725	0.000502089
PUS10	2.32e-05	0.384615	0.174785	0.000513604
SH3YL1	2.32e-05	0.384615	0.174785	0.000513604
PAPOLG	2.32e-05	0.384615	0.174785	0.000513604
CCT4	2.32e-05	0.384615	0.174785	0.000513604
C12orf72	2.44e-05	0.538462	0.30659	0.000532825
TPI1	2.44e-05	0.538462	0.30659	0.000532825
PEX5	2.44e-05	0.538462	0.30659	0.000532825
LEPREL2	2.44e-05	0.538462	0.30659	0.000532825
GPR162	2.44e-05	0.538462	0.30659	0.000532825
USP5	2.44e-05	0.538462	0.30659	0.000532825
MREG	2.43e-05	0.269231	0.0945559	0.000532825
CD163L1	2.44e-05	0.538462	0.30659	0.000532825
LMO3	2.49e-05	0.5	0.272206	0.000545236
LPCAT3	2.5e-05	0.548077	0.312321	0.000545537
EMG1	2.5e-05	0.548077	0.312321	0.000545537
PEX13	2.56e-05	0.384615	0.17765	0.000555959
KIAA1841	2.56e-05	0.384615	0.17765	0.000555959
MAFB	2.65e-05	0.471154	0.246418	0.000574805
C20orf26	2.67e-05	0.403846	0.194842	0.00057805
NAT5	2.67e-05	0.403846	0.194842	0.00057805
LOC100270804	2.8e-05	0.413462	0.200573	0.000606155
FITM2	2.83e-05	0.557692	0.323782	0.000611875
FAM161A	2.98e-05	0.384615	0.180516	0.000644037
DIP2B	3.02e-05	0.269231	0.0974212	0.000646486
SLC11A2	3.02e-05	0.269231	0.0974212	0.000646486
LETMD1	3.02e-05	0.269231	0.0974212	0.000646486
METTL7A	3.02e-05	0.269231	0.0974212	0.000646486
PECR	3.02e-05	0.269231	0.0974212	0.000646486
CSRNP2	3.02e-05	0.269231	0.0974212	0.000646486
HNF4A	3.03e-05	0.557692	0.326648	0.000647477
R3HDML	3.03e-05	0.557692	0.326648	0.000647477
GPR182	3.07e-05	0.25	0.0859599	0.000649947
ZNF641	3.07e-05	0.25	0.0859599	0.000649947
ZBTB39	3.07e-05	0.25	0.0859599	0.000649947
LALBA	3.07e-05	0.25	0.0859599	0.000649947
C2orf83	3.07e-05	0.25	0.0859599	0.000649947
TAC3	3.07e-05	0.25	0.0859599	0.000649947
ALG10B	3.04e-05	0.326923	0.13467	0.000649947
C12orf54	3.07e-05	0.25	0.0859599	0.000649947
PLEKHA5	3.14e-05	0.519231	0.289398	0.000663302
FAM90A1	3.14e-05	0.519231	0.289398	0.000663302
AEBP2	3.14e-05	0.519231	0.289398	0.000663302
HSPC072	3.17e-05	0.413462	0.203438	0.000667493
C20orf79	3.17e-05	0.413462	0.203438	0.000667493
SERINC3	3.2e-05	0.567308	0.335244	0.000673337
PLCG1	3.27e-05	0.471154	0.252149	0.000685766
TOP1	3.27e-05	0.471154	0.252149	0.000685766
ZHX3	3.27e-05	0.471154	0.252149	0.000685766
IQSEC3	3.28e-05	0.480769	0.25788	0.000685913
CNTN1	3.32e-05	0.307692	0.123209	0.000690485
GLS2	3.32e-05	0.307692	0.123209	0.000690485
YAF2	3.32e-05	0.307692	0.123209	0.000690485
PRICKLE1	3.32e-05	0.307692	0.123209	0.000690485
GLT8D3	3.32e-05	0.307692	0.123209	0.000690485
BICD1	3.33e-05	0.519231	0.292264	0.000691833
DEFB124	3.62e-05	0.586538	0.352436	0.00074953
C20orf160	3.62e-05	0.586538	0.352436	0.00074953
INPP4A	3.63e-05	0.288462	0.111748	0.00074953
CNGA3	3.63e-05	0.288462	0.111748	0.00074953
ADCY6	3.63e-05	0.240385	0.0802292	0.00074953
FKSG73	3.63e-05	0.240385	0.0802292	0.00074953
HCK	3.76e-05	0.586538	0.355301	0.000775454
TM9SF4	3.76e-05	0.586538	0.355301	0.000775454
NFS1	3.94e-05	0.528846	0.303725	0.000807096
UNQ2963	3.94e-05	0.528846	0.303725	0.000807096
CLSTN3	3.94e-05	0.528846	0.303725	0.000807096
C1R	3.94e-05	0.528846	0.303725	0.000807096
C1RL	3.94e-05	0.528846	0.303725	0.000807096
RBP5	3.94e-05	0.528846	0.303725	0.000807096
TMPRSS12	3.98e-05	0.269231	0.100287	0.000810375
DAZAP2	3.98e-05	0.269231	0.100287	0.000810375
TFCP2	3.98e-05	0.269231	0.100287	0.000810375
SMAGP	3.98e-05	0.269231	0.100287	0.000810375
2004-03-01	3.98e-05	0.269231	0.100287	0.000810375
CD4	4.02e-05	0.538462	0.309456	0.000816208
LAG3	4.02e-05	0.538462	0.309456	0.000816208
HM13	4.09e-05	0.586538	0.358166	0.000826932
REM1	4.09e-05	0.586538	0.358166	0.000826932
NCRNA00028	4.09e-05	0.586538	0.358166	0.000826932
MLF2	4.23e-05	0.538462	0.312321	0.000853962
PTMS	4.23e-05	0.538462	0.312321	0.000853962
POU5F1B	4.48e-05	0.5	0.722063	0.000904165
OVOL2	4.5e-05	0.403846	0.197708	0.000904802
CRNKL1	4.5e-05	0.403846	0.197708	0.000904802
C20orf72	4.5e-05	0.403846	0.197708	0.000904802
CD27	4.65e-05	0.538462	0.315186	0.000931507
BCAT1	4.65e-05	0.538462	0.315186	0.000931507
TAPBPL	4.65e-05	0.538462	0.315186	0.000931507
LOC196415	4.65e-05	0.538462	0.315186	0.000931507
SLC38A4	4.68e-05	0.288462	0.114613	0.000931991
SLC16A7	4.68e-05	0.230769	0.0744986	0.000931991
SPP2	4.68e-05	0.230769	0.0744986	0.000931991
ATG16L1	4.68e-05	0.230769	0.0744986	0.000931991
FAM110C	4.8e-05	0.375	0.17765	0.000954775
FAM113B	4.86e-05	0.278846	0.106017	0.000965279
LOC100233209	4.86e-05	0.278846	0.106017	0.000965279
FGD4	4.9e-05	0.5	0.280802	0.000971456
ATIC	4.9e-05	0.259615	0.0945559	0.000971654
C20orf186	4.92e-05	0.557692	0.329513	0.000974404
RAB5B	4.94e-05	0.317308	0.131805	0.000974762
CDK2	4.94e-05	0.317308	0.131805	0.000974762
AQP2	4.95e-05	0.240385	0.0830946	0.000974762
AQP6	4.95e-05	0.240385	0.0830946	0.000974762
AQP5	4.95e-05	0.240385	0.0830946	0.000974762
SNX5	5.08e-05	0.403846	0.200573	0.00099985
BPIL3	5.16e-05	0.557692	0.332378	0.00100758
RP11-49G10.8	5.16e-05	0.557692	0.332378	0.00100758
TTPAL	5.16e-05	0.557692	0.332378	0.00100758
BPIL1	5.16e-05	0.557692	0.332378	0.00100758
SPAG4L	5.16e-05	0.557692	0.332378	0.00100758
C20orf70	5.16e-05	0.557692	0.332378	0.00100758
C2orf74	5.26e-05	0.384615	0.183381	0.00102353
USP34	5.26e-05	0.384615	0.183381	0.00102353
C20orf19	5.26e-05	0.384615	0.183381	0.00102353
AHSA2	5.26e-05	0.384615	0.183381	0.00102353
ADA	5.46e-05	0.567308	0.340974	0.00106086
MAPRE1	5.64e-05	0.557692	0.335244	0.00109524
SFRS6	5.83e-05	0.519231	0.297994	0.00112639
L3MBTL	5.83e-05	0.519231	0.297994	0.00112639
SGK2	5.83e-05	0.519231	0.297994	0.00112639
ROMO1	5.83e-05	0.519231	0.297994	0.00112639
WISP2	5.84e-05	0.567308	0.34384	0.00112712
LRIG3	5.9e-05	0.230769	0.0773639	0.00113757
RBM39	6.31e-05	0.519231	0.30086	0.00121659
C1S	6.39e-05	0.528846	0.30659	0.00122603
FN1	6.41e-05	0.259615	0.0974212	0.00122603
CPNE1	6.39e-05	0.528846	0.30659	0.00122603
RBM12	6.39e-05	0.528846	0.30659	0.00122603
SPAG4	6.39e-05	0.528846	0.30659	0.00122603
HOXC8	6.41e-05	0.259615	0.0974212	0.00122603
RPRD1B	6.41e-05	0.480769	0.266476	0.00122603
VWA3B	6.46e-05	0.298077	0.123209	0.00123312
SPRYD4	6.46e-05	0.298077	0.123209	0.00123312
ACSL3	6.53e-05	0.25	0.0888252	0.00123607
TNP1	6.53e-05	0.25	0.0888252	0.00123607
COL4A4	6.53e-05	0.25	0.0888252	0.00123607
COL4A3	6.53e-05	0.25	0.0888252	0.00123607
LIMA1	6.53e-05	0.25	0.0888252	0.00123607
KIAA0748	6.53e-05	0.25	0.0888252	0.00123607
SLC19A3	6.53e-05	0.25	0.0888252	0.00123607
DIRC3	6.53e-05	0.25	0.0888252	0.00123607
CHD4	6.75e-05	0.528846	0.309456	0.00127403
COPS7A	6.75e-05	0.528846	0.309456	0.00127403
NOP2	6.75e-05	0.528846	0.309456	0.00127403
XPO1	6.85e-05	0.384615	0.189112	0.00129149
KIAA0406	7.19e-05	0.480769	0.269341	0.00135469
SCNN1A	7.25e-05	0.538462	0.318052	0.001356
LRMP	7.25e-05	0.538462	0.318052	0.001356
VAMP1	7.25e-05	0.538462	0.318052	0.001356
TNFRSF1A	7.25e-05	0.538462	0.318052	0.001356
PLEKHG6	7.25e-05	0.538462	0.318052	0.001356
CASC1	7.25e-05	0.538462	0.318052	0.001356
C12orf53	7.44e-05	0.528846	0.312321	0.00138568
LTBR	7.44e-05	0.528846	0.312321	0.00138568
IFFO1	7.44e-05	0.528846	0.312321	0.00138568
GAPDH	7.44e-05	0.528846	0.312321	0.00138568
LPAR5	7.44e-05	0.528846	0.312321	0.00138568
AMIGO2	7.5e-05	0.278846	0.111748	0.00139464
DHH	7.96e-05	0.230769	0.0802292	0.00143714
MUCL1	7.93e-05	0.25	0.0916905	0.00143714
RHEBL1	7.96e-05	0.230769	0.0802292	0.00143714
DYNLRB1	7.81e-05	0.538462	0.320917	0.00143714
PPHLN1	7.97e-05	0.307692	0.12894	0.00143714
CNPY2	7.97e-05	0.307692	0.12894	0.00143714
ATF1	7.89e-05	0.269231	0.103152	0.00143714
RPL37A	7.89e-05	0.269231	0.103152	0.00143714
DDX23	7.96e-05	0.230769	0.0802292	0.00143714
PRKAG1	7.96e-05	0.230769	0.0802292	0.00143714
MYC	7.79e-05	0.509615	0.722063	0.00143714
DNM1L	7.79e-05	0.490385	0.277937	0.00143714
IRS1	7.93e-05	0.25	0.0916905	0.00143714
POU6F1	7.89e-05	0.269231	0.103152	0.00143714
WNT10B	7.96e-05	0.230769	0.0802292	0.00143714
WNT1	7.96e-05	0.230769	0.0802292	0.00143714
CACNB3	7.96e-05	0.230769	0.0802292	0.00143714
RND1	7.96e-05	0.230769	0.0802292	0.00143714
MLL2	7.96e-05	0.230769	0.0802292	0.00143714
DDN	7.96e-05	0.230769	0.0802292	0.00143714
LMBR1L	7.96e-05	0.230769	0.0802292	0.00143714
PLUNC	7.8e-05	0.548077	0.326648	0.00143714
MAP1LC3A	7.81e-05	0.538462	0.320917	0.00143714
ZCRB1	7.97e-05	0.307692	0.12894	0.00143714
PIGU	7.81e-05	0.538462	0.320917	0.00143714
C20orf114	7.8e-05	0.548077	0.326648	0.00143714
RHBDD1	7.93e-05	0.25	0.0916905	0.00143714
CAPZA3	7.93e-05	0.5	0.283668	0.00143714
C20orf71	7.8e-05	0.548077	0.326648	0.00143714
WDR69	7.93e-05	0.25	0.0916905	0.00143714
RALY	8.21e-05	0.548077	0.329513	0.00147899
CDK5RAP1	8.21e-05	0.548077	0.329513	0.00147899
PAX1	8.37e-05	0.375	0.180516	0.00150488
PLCZ1	8.45e-05	0.5	0.286533	0.00151927
KIAA1310	8.67e-05	0.288462	0.117479	0.00155379
ARID5A	8.67e-05	0.288462	0.117479	0.00155379
NEURL3	8.67e-05	0.288462	0.117479	0.00155379
DTD1	8.78e-05	0.403846	0.203438	0.0015707
LOC388789	8.78e-05	0.403846	0.203438	0.0015707
DGKA	8.94e-05	0.307692	0.131805	0.00159523
SILV	8.94e-05	0.307692	0.131805	0.00159523
SSPN	9.01e-05	0.548077	0.332378	0.00160554
KCNK15	9.18e-05	0.567308	0.346705	0.00163399
RIMS4	9.18e-05	0.567308	0.346705	0.00163399
ETV6	9.4e-05	0.471154	0.260745	0.00167034
SNRPB2	9.55e-05	0.403846	0.206304	0.00168944
SEC23B	9.55e-05	0.403846	0.206304	0.00168944
ZNF133	9.55e-05	0.403846	0.206304	0.00168944
OTOR	9.55e-05	0.403846	0.206304	0.00168944
CSRP2BP	9.55e-05	0.403846	0.206304	0.00168944
WFDC6	9.64e-05	0.567308	0.34957	0.00169757
WFDC8	9.64e-05	0.567308	0.34957	0.00169757
PIGT	9.64e-05	0.567308	0.34957	0.00169757
SPINLW1	9.64e-05	0.567308	0.34957	0.00169757
TP53TG5	9.64e-05	0.567308	0.34957	0.00169757
NOV	0.000100259	0.423077	0.641834	0.00176134
ENPP2	0.000100259	0.423077	0.641834	0.00176134
AP1S3	0.000102645	0.25	0.0945559	0.00179282
IGFBP5	0.000102645	0.25	0.0945559	0.00179282
SCG2	0.000102645	0.25	0.0945559	0.00179282
CCL20	0.000102645	0.25	0.0945559	0.00179282
SPHKAP	0.000102645	0.25	0.0945559	0.00179282
ANKRD33	0.000102645	0.25	0.0945559	0.00179282
IRAK3	0.000103357	0.288462	0.120344	0.00180005
C2orf55	0.000103357	0.288462	0.120344	0.00180005
CNNM4	0.000103357	0.288462	0.120344	0.00180005
BEST3	0.000106604	0.307692	0.13467	0.0018477
RAB3IP	0.000106604	0.307692	0.13467	0.0018477
CCT2	0.000106604	0.307692	0.13467	0.0018477
SMARCD1	0.000106311	0.240385	0.0859599	0.0018477
FAIM2	0.000106311	0.240385	0.0859599	0.0018477
POLR3F	0.000108869	0.403846	0.209169	0.00188335
RBBP9	0.000108869	0.403846	0.209169	0.00188335
NCAPD2	0.0001141	0.528846	0.315186	0.00196446
ZNF384	0.0001141	0.528846	0.315186	0.00196446
ING4	0.0001141	0.528846	0.315186	0.00196446
MRPL51	0.0001141	0.528846	0.315186	0.00196446
ACRBP	0.0001141	0.528846	0.315186	0.00196446
TSPAN8	0.000119542	0.269231	0.108883	0.00205619
KRAS	0.000122434	0.538462	0.323782	0.00210194
LYRM5	0.000122434	0.538462	0.323782	0.00210194
PKP2	0.000122555	0.480769	0.275072	0.00210202
NCOA6	0.000123237	0.528846	0.318052	0.00210972
TP53INP2	0.000123237	0.528846	0.318052	0.00210972
SUOX	0.000123447	0.317308	0.140401	0.00211132
PVT1	0.000124145	0.509615	0.719198	0.00211925
YARS2	0.000124145	0.490385	0.280802	0.00211925
IL23A	0.000127505	0.298077	0.126074	0.00214727
BCAM	0.0001273	0.221154	0.0773639	0.00214727
TIMELESS	0.000127505	0.298077	0.126074	0.00214727
DYRK1B	0.000127314	0.384615	0.194842	0.00214727
ACCN2	0.000127685	0.240385	0.0888252	0.00214727
STAT2	0.000127505	0.298077	0.126074	0.00214727
HOXC5	0.000127236	0.259615	0.100287	0.00214727
HOXC6	0.000127236	0.259615	0.100287	0.00214727
APOF	0.000127505	0.298077	0.126074	0.00214727
FBL	0.000127314	0.384615	0.194842	0.00214727
SMARCAL1	0.000127236	0.259615	0.100287	0.00214727
MIP	0.000127505	0.298077	0.126074	0.00214727
RACGAP1	0.000127685	0.240385	0.0888252	0.00214727
HOXC9	0.000127236	0.259615	0.100287	0.00214727
BCDIN3D	0.000127685	0.240385	0.0888252	0.00214727
LOC100286844	0.000127685	0.240385	0.0888252	0.00214727
COL14A1	0.000136236	0.451923	0.664756	0.00228894
BFSP1	0.000137827	0.394231	0.200573	0.00231353
KIF5C	0.000138889	0.278846	0.114613	0.0023292
PAN2	0.000142352	0.298077	0.12894	0.00238506
DHX35	0.000143679	0.451923	0.252149	0.00240506
CMAS	0.000143987	0.5	0.292264	0.002408
MTBP	0.000146628	0.451923	0.661891	0.00244313
SNTB1	0.000146628	0.451923	0.661891	0.00244313
BHLHE41	0.000146628	0.548077	0.338109	0.00244313
SLC32A1	0.000146613	0.461538	0.25788	0.00244313
AFF3	0.000150923	0.259615	0.103152	0.00250776
GPR84	0.000150923	0.259615	0.103152	0.00250776
ZNF385A	0.000150923	0.259615	0.103152	0.00250776
WFDC11	0.000151715	0.557692	0.346705	0.00251861
WFDC2	0.000152312	0.567308	0.352436	0.00251927
SDC4	0.000152312	0.567308	0.352436	0.00251927
SPINT3	0.000152312	0.567308	0.352436	0.00251927
SYS1	0.000152312	0.567308	0.352436	0.00251927
WFDC12	0.000157398	0.567308	0.355301	0.00256588
ST8SIA1	0.000156661	0.509615	0.30086	0.00256588
TOMM34	0.000157398	0.567308	0.355301	0.00256588
PI3	0.000157398	0.567308	0.355301	0.00256588
PDE3A	0.000156556	0.5	0.295129	0.00256588
MATN4	0.000157398	0.567308	0.355301	0.00256588
KCNS1	0.000157398	0.567308	0.355301	0.00256588
YWHAB	0.000157398	0.567308	0.355301	0.00256588
AKAP8L	0.000156661	0.509615	0.30086	0.00256588
SEMG2	0.000157398	0.567308	0.355301	0.00256588
SLCO1C1	0.000156556	0.5	0.295129	0.00256588
WIZ	0.000156661	0.509615	0.30086	0.00256588
PABPC1L	0.000157398	0.567308	0.355301	0.00256588
RASAL3	0.000156661	0.509615	0.30086	0.00256588
WFDC5	0.000157398	0.567308	0.355301	0.00256588
PGLYRP2	0.000156661	0.509615	0.30086	0.00256588
KCNE4	0.00016353	0.240385	0.0916905	0.0026515
MOGAT1	0.00016353	0.240385	0.0916905	0.0026515
CHPF	0.00016353	0.240385	0.0916905	0.0026515
INHA	0.00016353	0.240385	0.0916905	0.0026515
OBSL1	0.00016353	0.240385	0.0916905	0.0026515
TMEM198	0.00016353	0.240385	0.0916905	0.0026515
MGAT4A	0.000164271	0.278846	0.117479	0.00265637
UNC50	0.000164271	0.278846	0.117479	0.00265637
C2orf64	0.000164271	0.278846	0.117479	0.00265637
KIAA1755	0.000165709	0.471154	0.266476	0.00267246
TGM2	0.000165709	0.471154	0.266476	0.00267246
BPI	0.000165709	0.471154	0.266476	0.00267246
CS	0.000168635	0.298077	0.131805	0.00271482
COQ10A	0.000168635	0.298077	0.131805	0.00271482
STK4	0.000169032	0.567308	0.358166	0.00271637
MAL2	0.000169032	0.432692	0.641834	0.00271637
ERGIC3	0.000170835	0.519231	0.309456	0.00273562
SOX5	0.000170835	0.519231	0.309456	0.00273562
FER1L4	0.000170835	0.519231	0.309456	0.00273562
C20orf173	0.000170835	0.519231	0.309456	0.00273562
CCDC65	0.000172254	0.230769	0.0830946	0.00274377
ZNF229	0.000172254	0.230769	0.0830946	0.00274377
TUBA1B	0.000172254	0.230769	0.0830946	0.00274377
ARF3	0.000172254	0.230769	0.0830946	0.00274377
TUBA1A	0.000172254	0.230769	0.0830946	0.00274377
FKBP11	0.000172254	0.230769	0.0830946	0.00274377
LBP	0.0001742	0.471154	0.269341	0.00277234
C20orf74	0.000177144	0.375	0.189112	0.00281671
STK38L	0.000177741	0.519231	0.312321	0.00282124
GGT7	0.000177741	0.519231	0.312321	0.00282124
FAM83C	0.000190086	0.528846	0.320917	0.00298319
HNRNPA1	0.000189407	0.259615	0.106017	0.00298319
ITGA5	0.000189407	0.259615	0.106017	0.00298319
PROCR	0.000190086	0.528846	0.320917	0.00298319
MMP24	0.000190086	0.528846	0.320917	0.00298319
NFE2	0.000189407	0.259615	0.106017	0.00298319
EIF6	0.000190086	0.528846	0.320917	0.00298319
HMGB3L1	0.000190086	0.528846	0.320917	0.00298319
COPZ1	0.000189407	0.259615	0.106017	0.00298319
UQCC	0.000190086	0.528846	0.320917	0.00298319
EDEM2	0.000190086	0.528846	0.320917	0.00298319
IL1F5	0.000189407	0.259615	0.106017	0.00298319
IL1F10	0.000189407	0.259615	0.106017	0.00298319
KIAA1219	0.000190822	0.471154	0.272206	0.00299214
GDF5	0.00019232	0.519231	0.315186	0.00300261
RASSF8	0.00019232	0.519231	0.315186	0.00300261
MED21	0.00019232	0.519231	0.315186	0.00300261
CEP250	0.00019232	0.519231	0.315186	0.00300261
DENND5B	0.00019232	0.519231	0.315186	0.00300261
C20orf12	0.000194585	0.403846	0.2149	0.00303535
SLC39A5	0.000195227	0.307692	0.137536	0.00304274
INSM1	0.000198769	0.375	0.191977	0.0030953
ACSS2	0.000201533	0.528846	0.323782	0.00313563
CBFA2T2	0.000203764	0.538462	0.329513	0.00313788
CUL3	0.000204105	0.25	0.0974212	0.00313788
IGFBP2	0.000204105	0.25	0.0974212	0.00313788
ITCH	0.000203764	0.538462	0.329513	0.00313788
SERPINE2	0.000204105	0.25	0.0974212	0.00313788
ASIP	0.000203764	0.538462	0.329513	0.00313788
ABCA12	0.000204105	0.25	0.0974212	0.00313788
MRPL44	0.000204105	0.25	0.0974212	0.00313788
FAM124B	0.000204105	0.25	0.0974212	0.00313788
CNNM3	0.000202649	0.288462	0.123209	0.00313788
LMAN2L	0.000202649	0.288462	0.123209	0.00313788
WDFY1	0.000204105	0.25	0.0974212	0.00313788
LASS5	0.000204105	0.25	0.0974212	0.00313788
FER1L5	0.000202649	0.288462	0.123209	0.00313788
TMBIM6	0.000204578	0.230769	0.0859599	0.00313981
ZFP112	0.000204578	0.230769	0.0859599	0.00313981
ZNF341	0.000211688	0.538462	0.332378	0.00322162
AHCY	0.000211688	0.538462	0.332378	0.00322162
E2F1	0.000211688	0.538462	0.332378	0.00322162
SNTA1	0.000211688	0.538462	0.332378	0.00322162
EIF2S2	0.000211688	0.538462	0.332378	0.00322162
NECAB3	0.000211688	0.538462	0.332378	0.00322162
PXMP4	0.000211688	0.538462	0.332378	0.00322162
CHMP4B	0.000211688	0.538462	0.332378	0.00322162
C20orf144	0.000211688	0.538462	0.332378	0.00322162
C20orf134	0.000211688	0.538462	0.332378	0.00322162
CLC	0.000214359	0.384615	0.197708	0.00325405
LOC100129935	0.000214359	0.384615	0.197708	0.00325405
BANF2	0.000214359	0.384615	0.197708	0.00325405
LIMS1	0.000215359	0.182692	0.0573066	0.00326649
IKZF4	0.000219357	0.307692	0.140401	0.00331879
RPS26	0.000219357	0.307692	0.140401	0.00331879
OBFC2B	0.000219357	0.307692	0.140401	0.00331879
IL1RN	0.000220981	0.269231	0.111748	0.00334056
LOC339568	0.000222888	0.442308	0.249284	0.00336657
FAM83D	0.00022654	0.451923	0.255014	0.00341888
RRBP1	0.000232777	0.384615	0.200573	0.00350424
LGALS14	0.000232777	0.384615	0.200573	0.00350424
LGALS13	0.000232777	0.384615	0.200573	0.00350424
WFDC9	0.000235259	0.557692	0.34957	0.00353572
WFDC10A	0.000235259	0.557692	0.34957	0.00353572
DNAJB2	0.000239921	0.25	0.100287	0.0035998
PTPRN	0.000239921	0.25	0.100287	0.0035998
OR7C2	0.000241565	0.5	0.297994	0.00361848
CYP4F22	0.000241565	0.5	0.297994	0.00361848
SLCO1B3	0.000242502	0.490385	0.292264	0.00362651
FAM84B	0.000242502	0.509615	0.707736	0.00362651
TAF2	0.000244287	0.442308	0.647564	0.00364565
ACTR5	0.000244386	0.451923	0.25788	0.00364565
RBPJL	0.000244287	0.557692	0.352436	0.00364565
SLPI	0.000253575	0.567308	0.361032	0.00377649
COLEC10	0.000253575	0.432692	0.638968	0.00377649
VSTM2L	0.000254755	0.461538	0.26361	0.00379095
ABCC9	0.000257471	0.5	0.30086	0.00381572
SMARCC2	0.000259229	0.307692	0.143266	0.00381572
NCKAP5L	0.000259212	0.230769	0.0888252	0.00381572
RNF41	0.000259229	0.307692	0.143266	0.00381572
MYL6B	0.000259229	0.307692	0.143266	0.00381572
KCNJ8	0.000257471	0.5	0.30086	0.00381572
TUBA1C	0.000259212	0.230769	0.0888252	0.00381572
ZNF235	0.000259212	0.230769	0.0888252	0.00381572
MYL6	0.000259229	0.307692	0.143266	0.00381572
KIAA0528	0.000257471	0.5	0.30086	0.00381572
REV1	0.000259372	0.269231	0.114613	0.00381572
ETNK1	0.000257471	0.5	0.30086	0.00381572
FAM186B	0.000259212	0.230769	0.0888252	0.00381572
FMNL3	0.000259212	0.230769	0.0888252	0.00381572
AKAP8	0.000262348	0.509615	0.30659	0.00385637
SEMG1	0.00026296	0.557692	0.355301	0.00386222
DSTN	0.000263867	0.384615	0.203438	0.00387241
PSD4	0.00026485	0.288462	0.12894	0.00388368
PVRL2	0.000277788	0.221154	0.0802292	0.0040668
ZNF180	0.000277788	0.221154	0.0802292	0.0040668
TRPC4AP	0.00029203	0.519231	0.318052	0.00426496
FAM60A	0.00029203	0.519231	0.318052	0.00426496
FLJ13224	0.00029203	0.519231	0.318052	0.00426496
ADIG	0.000293998	0.461538	0.269341	0.00428333
BLCAP	0.000293998	0.461538	0.269341	0.00428333
NNAT	0.000293998	0.461538	0.269341	0.00428333
SNORA71A	0.000295259	0.471154	0.275072	0.00428789
SNORA71B	0.000295259	0.471154	0.275072	0.00428789
LOC388796	0.000295259	0.471154	0.275072	0.00428789
SNHG11	0.000295259	0.471154	0.275072	0.00428789
SPAG16	0.000298312	0.25	0.103152	0.00429773
ATG9A	0.000298312	0.25	0.103152	0.00429773
ABCB6	0.000298312	0.25	0.103152	0.00429773
GLB1L	0.000298312	0.25	0.103152	0.00429773
TUBA4B	0.000298312	0.25	0.103152	0.00429773
STK16	0.000298312	0.25	0.103152	0.00429773
NCKAP1L	0.000298312	0.25	0.103152	0.00429773
TUBA4A	0.000298312	0.25	0.103152	0.00429773
ANKZF1	0.000298312	0.25	0.103152	0.00429773
ZFAND2B	0.000298312	0.25	0.103152	0.00429773
CNOT2	0.00030643	0.298077	0.13467	0.00440767
ANKRD52	0.00030643	0.298077	0.13467	0.00440767
XRN2	0.000307559	0.365385	0.189112	0.0044204
GSS	0.00031039	0.519231	0.320917	0.00445048
TRIB1	0.00031039	0.480769	0.679083	0.00445048
MYH7B	0.00031039	0.519231	0.320917	0.00445048
IFNG	0.000319509	0.269231	0.117479	0.00457761
LYPD6B	0.0003198	0.278846	0.120344	0.00457816
AGAP1	0.000322194	0.201923	0.0716332	0.00460877
GPD1	0.00032553	0.240385	0.0945559	0.00462264
BCL3	0.000326229	0.221154	0.0830946	0.00462264
HOXC11	0.00032553	0.240385	0.0945559	0.00462264
ACVRL1	0.00032553	0.240385	0.0945559	0.00462264
DOCK10	0.00032553	0.240385	0.0945559	0.00462264
GMPPA	0.00032553	0.240385	0.0945559	0.00462264
HOXC10	0.00032553	0.240385	0.0945559	0.00462264
CBLC	0.000326229	0.221154	0.0830946	0.00462264
ACCN4	0.00032553	0.240385	0.0945559	0.00462264
STK11IP	0.00032553	0.240385	0.0945559	0.00462264
ZNF285A	0.000326229	0.221154	0.0830946	0.00462264
H1FNT	0.00032553	0.240385	0.0945559	0.00462264
MRPL13	0.000341647	0.461538	0.661891	0.00483354
EDAR	0.000341592	0.173077	0.0544413	0.00483354
FLJ12825	0.000349308	0.259615	0.108883	0.00493421
LOC100240734	0.000349308	0.259615	0.108883	0.00493421
ITPR2	0.000351369	0.528846	0.332378	0.00495946
ANKRD23	0.000353376	0.278846	0.123209	0.00496841
HMGA2	0.000353376	0.278846	0.123209	0.00496841
SEMA4C	0.000353376	0.278846	0.123209	0.00496841
ANKRD39	0.000353376	0.278846	0.123209	0.00496841
FAM178B	0.000353376	0.278846	0.123209	0.00496841
DSCC1	0.000359533	0.451923	0.653295	0.00504713
DEPDC6	0.000359533	0.451923	0.653295	0.00504713
SLCO1B1	0.000368693	0.490385	0.295129	0.00517171
WFDC10B	0.000374824	0.548077	0.34957	0.00523792
WFDC13	0.000374824	0.548077	0.34957	0.00523792
SLC23A3	0.000379203	0.240385	0.0974212	0.00523792
CCDC108	0.000379203	0.240385	0.0974212	0.00523792
DCD	0.000379203	0.240385	0.0974212	0.00523792
SPEG	0.000379203	0.240385	0.0974212	0.00523792
DNPEP	0.000379203	0.240385	0.0974212	0.00523792
DES	0.000379203	0.240385	0.0974212	0.00523792
ACVR1B	0.000379203	0.240385	0.0974212	0.00523792
CDK5R2	0.000379203	0.240385	0.0974212	0.00523792
SLC4A3	0.000379203	0.240385	0.0974212	0.00523792
FEV	0.000379203	0.240385	0.0974212	0.00523792
IHH	0.000379203	0.240385	0.0974212	0.00523792
NHEJ1	0.000379203	0.240385	0.0974212	0.00523792
CRYBA2	0.000379203	0.240385	0.0974212	0.00523792
WNT6	0.000379203	0.240385	0.0974212	0.00523792
WNT10A	0.000379203	0.240385	0.0974212	0.00523792
C12orf62	0.000379203	0.240385	0.0974212	0.00523792
C12orf68	0.000379203	0.240385	0.0974212	0.00523792
LOC151300	0.000379203	0.240385	0.0974212	0.00523792
PPP1R16B	0.000387929	0.451923	0.260745	0.00535437
BCL2L11	0.000394039	0.163462	0.0487106	0.00540571
SLC1A6	0.000393606	0.490385	0.297994	0.00540571
PHF20	0.000393606	0.490385	0.297994	0.00540571
2010-09-01	0.000394039	0.163462	0.0487106	0.00540571
GYS2	0.000393606	0.490385	0.297994	0.00540571
LOC440895	0.000394039	0.163462	0.0487106	0.00540571
ANKRD57	0.000394039	0.163462	0.0487106	0.00540571
C12orf39	0.000393606	0.490385	0.297994	0.00540571
OR7A17	0.000398855	0.5	0.303725	0.00546764
CPSF6	0.000402465	0.298077	0.140401	0.00551295
MSRB3	0.000406854	0.259615	0.111748	0.0055437
WIF1	0.000406854	0.259615	0.111748	0.0055437
CBX5	0.000406854	0.259615	0.111748	0.0055437
LGR5	0.000406854	0.259615	0.111748	0.0055437
LEMD3	0.000406854	0.259615	0.111748	0.0055437
SMUG1	0.000406854	0.259615	0.111748	0.0055437
LOC400043	0.000406854	0.259615	0.111748	0.0055437
CTNNBL1	0.000409425	0.451923	0.26361	0.00557452
AKT1S1	0.000412447	0.134615	0.034384	0.00559462
SIGLEC16	0.000412447	0.134615	0.034384	0.00559462
VRK3	0.000412447	0.134615	0.034384	0.00559462
NUP62	0.000412447	0.134615	0.034384	0.00559462
TBC1D17	0.000412447	0.134615	0.034384	0.00559462
PCSK2	0.000417677	0.384615	0.206304	0.00566132
SCRT1	0.000440632	0.413462	0.613181	0.00596799
YEATS4	0.000441365	0.307692	0.146132	0.00597345
NCRNA00152	0.00044587	0.211538	0.0773639	0.0060254
TOMM40	0.00044587	0.211538	0.0773639	0.0060254
USHBP1	0.000448235	0.451923	0.266476	0.00605285
NFKBIL2	0.000459995	0.413462	0.610315	0.00618856
HSF1	0.000459995	0.413462	0.610315	0.00618856
DGAT1	0.000459995	0.413462	0.610315	0.00618856
VPS28	0.000459995	0.413462	0.610315	0.00618856
KIF16B	0.000459337	0.384615	0.209169	0.00618856
HOXC12	0.000467049	0.240385	0.100287	0.00625093
C2orf24	0.000467049	0.240385	0.100287	0.00625093
PPP1R1A	0.000467049	0.240385	0.100287	0.00625093
ASB8	0.000467049	0.240385	0.100287	0.00625093
HOXC13	0.000467049	0.240385	0.100287	0.00625093
LACRT	0.000467049	0.240385	0.100287	0.00625093
HOTAIR	0.000467049	0.240385	0.100287	0.00625093
FGFR1OP2	0.000472647	0.519231	0.323782	0.00630718
NKX2-2	0.000471654	0.355769	0.186246	0.00630718
TM7SF3	0.000472647	0.519231	0.323782	0.00630718
C12orf11	0.000472647	0.519231	0.323782	0.00630718
WIBG	0.000477361	0.288462	0.131805	0.00636539
MIB1	0.00049265	0.173077	0.0573066	0.00656443
ZFP64	0.000493403	0.596154	0.401146	0.00656962
C12orf66	0.000497006	0.259615	0.114613	0.00658073
LYZ	0.000497146	0.307692	0.148997	0.00658073
CD63	0.000497006	0.259615	0.114613	0.00658073
BLOC1S1	0.000497006	0.259615	0.114613	0.00658073
ITGA7	0.000497006	0.259615	0.114613	0.00658073
RDH5	0.000497006	0.259615	0.114613	0.00658073
FRS2	0.000497146	0.307692	0.148997	0.00658073
METTL7B	0.000497006	0.259615	0.114613	0.00658073
TROAP	0.00051619	0.230769	0.0916905	0.00679212
MCRS1	0.00051619	0.230769	0.0916905	0.00679212
CD97	0.000517413	0.471154	0.283668	0.00679212
PCBP2	0.000517785	0.211538	0.0802292	0.00679212
MAP3K12	0.000517785	0.211538	0.0802292	0.00679212
EPHA4	0.00051619	0.230769	0.0916905	0.00679212
RNF139	0.000517995	0.471154	0.664756	0.00679212
PRPH	0.00051619	0.230769	0.0916905	0.00679212
PRR13	0.000517785	0.211538	0.0802292	0.00679212
TRMT12	0.000517995	0.471154	0.664756	0.00679212
DNAJC22	0.00051619	0.230769	0.0916905	0.00679212
FARSB	0.00051619	0.230769	0.0916905	0.00679212
KCNH3	0.00051619	0.230769	0.0916905	0.00679212
EBAG9	0.000522332	0.384615	0.578797	0.00684402
KCNMB4	0.000531336	0.288462	0.13467	0.00695697
BIN3	0.000543325	0.0769231	0.00859599	0.00705777
LOXL2	0.000543325	0.0769231	0.00859599	0.00705777
EGR3	0.000543325	0.0769231	0.00859599	0.00705777
FLJ14107	0.000543325	0.0769231	0.00859599	0.00705777
SORBS3	0.000543325	0.0769231	0.00859599	0.00705777
CHMP7	0.000543325	0.0769231	0.00859599	0.00705777
R3HCC1	0.000543325	0.0769231	0.00859599	0.00705777
PDLIM2	0.000543325	0.0769231	0.00859599	0.00705777
KIAA1967	0.000543325	0.0769231	0.00859599	0.00705777
C8orf58	0.000543325	0.0769231	0.00859599	0.00705777
PEBP4	0.000543325	0.0769231	0.00859599	0.00705777
IKZF2	0.000548551	0.25	0.106017	0.00711034
INA	0.000548179	0.115385	0.025788	0.00711034
IL8RB	0.000548551	0.25	0.106017	0.00711034
DYRK2	0.000550856	0.269231	0.120344	0.00711982
LLPH	0.000550856	0.269231	0.120344	0.00711982
TMBIM4	0.000550856	0.269231	0.120344	0.00711982
TMEM65	0.000550828	0.471154	0.661891	0.00711982
CCDC105	0.000556995	0.480769	0.292264	0.00719403
PKN1	0.000563166	0.471154	0.286533	0.00726335
C20orf4	0.000563166	0.471154	0.286533	0.00726335
ANXA13	0.00056858	0.461538	0.653295	0.00732274
FBXO32	0.00056858	0.461538	0.653295	0.00732274
C20orf165	0.000587902	0.548077	0.355301	0.00751809
CTSA	0.000587902	0.548077	0.355301	0.00751809
PLTP	0.000587902	0.548077	0.355301	0.00751809
MMP9	0.000587902	0.548077	0.355301	0.00751809
SLC12A5	0.000587902	0.548077	0.355301	0.00751809
ZSWIM1	0.000587902	0.548077	0.355301	0.00751809
PCIF1	0.000587902	0.548077	0.355301	0.00751809
ZNF335	0.000587902	0.548077	0.355301	0.00751809
NEURL2	0.000587902	0.548077	0.355301	0.00751809
WFDC3	0.000587902	0.548077	0.355301	0.00751809
SPATS2	0.000595895	0.230769	0.0945559	0.00760417
CASP14	0.000595274	0.480769	0.295129	0.00760417
KIAA1486	0.000595895	0.230769	0.0945559	0.00760417
LDHB	0.000600314	0.490385	0.30086	0.00762829
RECQL	0.000600314	0.490385	0.30086	0.00762829
IAPP	0.000600314	0.490385	0.30086	0.00762829
SLCO1A2	0.000600314	0.490385	0.30086	0.00762829
OR7A10	0.000600314	0.490385	0.30086	0.00762829
GOLT1B	0.000600314	0.490385	0.30086	0.00762829
SNX21	0.000624859	0.548077	0.358166	0.00790688
UBE2C	0.000624859	0.548077	0.358166	0.00790688
ACOT8	0.000624859	0.548077	0.358166	0.00790688
TNNC2	0.000624859	0.548077	0.358166	0.00790688
DNTTIP1	0.000624859	0.548077	0.358166	0.00790688
ZSWIM3	0.000624859	0.548077	0.358166	0.00790688
PYROXD1	0.000630061	0.490385	0.303725	0.00796713
IL8RA	0.000634021	0.25	0.108883	0.00798929
ARPC2	0.000634021	0.25	0.108883	0.00798929
DLL3	0.000634002	0.375	0.203438	0.00798929
SLC35F5	0.000634021	0.25	0.108883	0.00798929
GTSF1	0.000634021	0.25	0.108883	0.00798929
HELB	0.000639368	0.269231	0.123209	0.00801758
PTPRB	0.000639368	0.269231	0.123209	0.00801758
TNFRSF11B	0.000637227	0.442308	0.633238	0.00801758
PTPRR	0.000639368	0.269231	0.123209	0.00801758
DENND3	0.000637227	0.442308	0.633238	0.00801758
GRIP1	0.000639368	0.269231	0.123209	0.00801758
ANKRD36B	0.000639368	0.269231	0.123209	0.00801758
FAM19A2	0.000641668	0.211538	0.0830946	0.00804085
ANKLE1	0.000676301	0.442308	0.26361	0.00843978
SRC	0.000674829	0.451923	0.269341	0.00843978
ANO8	0.000676301	0.442308	0.26361	0.00843978
DDA1	0.000676301	0.442308	0.26361	0.00843978
ABHD8	0.000676301	0.442308	0.26361	0.00843978
MRPL34	0.000676301	0.442308	0.26361	0.00843978
FOXH1	0.00068268	0.413462	0.60745	0.00850764
BOP1	0.00068268	0.413462	0.60745	0.00850764
ZC3H8	0.000683436	0.192308	0.0716332	0.0085112
SIGLEC11	0.000691073	0.134615	0.0372493	0.00859448
ATF5	0.000691073	0.134615	0.0372493	0.00859448
TIMM50	0.000695894	0.375	0.206304	0.00863662
EID2	0.000695894	0.375	0.206304	0.00863662
EID2B	0.000695894	0.375	0.206304	0.00863662
RECQL4	0.000704546	0.413462	0.604585	0.00868444
HEATR7A	0.000704546	0.413462	0.604585	0.00868444
LRRC14	0.000704546	0.413462	0.604585	0.00868444
GPT	0.000704546	0.413462	0.604585	0.00868444
CYHR1	0.000704546	0.413462	0.604585	0.00868444
PPP1R16A	0.000704546	0.413462	0.604585	0.00868444
C8orf82	0.000704546	0.413462	0.604585	0.00868444
KIFC2	0.000704546	0.413462	0.604585	0.00868444
MFSD3	0.000704546	0.413462	0.604585	0.00868444
KIAA1688	0.000704546	0.413462	0.604585	0.00868444
CXCR7	0.000712251	0.201923	0.0744986	0.00876151
IQCA1	0.000712251	0.201923	0.0744986	0.00876151
GATA6	0.000712251	0.201923	0.0744986	0.00876151
PSMC4	0.000716869	0.346154	0.183381	0.00880635
ZNF546	0.000716869	0.346154	0.183381	0.00880635
ACTR3	0.000726915	0.230769	0.0974212	0.00890557
BCS1L	0.000726915	0.230769	0.0974212	0.00890557
RNF25	0.000726915	0.230769	0.0974212	0.00890557
STK36	0.000726915	0.230769	0.0974212	0.00890557
EMR3	0.000737012	0.461538	0.277937	0.00902316
ZAP70	0.000738017	0.278846	0.12894	0.00902325
TMEM131	0.000738017	0.278846	0.12894	0.00902325
IFLTD1	0.000743216	0.509615	0.323782	0.00908069
C8orf31	0.000747634	0.403846	0.593123	0.00912234
LY6H	0.000747634	0.403846	0.593123	0.00912234
ESYT1	0.00076183	0.298077	0.146132	0.0092893
GNS	0.000767947	0.25	0.111748	0.00934499
RAB21	0.000767947	0.25	0.111748	0.00934499
TMEM19	0.000767947	0.25	0.111748	0.00934499
ZNF333	0.00077628	0.461538	0.280802	0.0094337
EMR2	0.00077628	0.461538	0.280802	0.0094337
PTPN1	0.000785129	0.615385	0.426934	0.00952844
PKHD1L1	0.000785129	0.384615	0.573066	0.00952844
GEMIN7	0.000803783	0.182692	0.0659026	0.00974177
ZNF296	0.000803783	0.182692	0.0659026	0.00974177
PVR	0.00081374	0.221154	0.0888252	0.00983609
ZNF740	0.00081374	0.221154	0.0888252	0.00983609
CSAD	0.00081374	0.221154	0.0888252	0.00983609
CEACAM19	0.00081374	0.221154	0.0888252	0.00983609
APOE	0.000817984	0.201923	0.0773639	0.00985447
APOC1	0.000817984	0.201923	0.0773639	0.00985447
GBX2	0.000817984	0.201923	0.0773639	0.00985447
ASB1	0.000817984	0.201923	0.0773639	0.00985447
TRAF3IP1	0.000817984	0.201923	0.0773639	0.00985447
TATDN1	0.000827294	0.480769	0.664756	0.00996
TAF5	0.000829597	0.105769	0.0229226	0.00996121
BTRC	0.000829597	0.105769	0.0229226	0.00996121
POLL	0.000829597	0.105769	0.0229226	0.00996121
PCGF6	0.000829597	0.105769	0.0229226	0.00996121
DLGAP4	0.000832907	0.471154	0.289398	0.00999433
EIF5B	0.000852568	0.259615	0.117479	0.0101763
CAND1	0.000852568	0.259615	0.117479	0.0101763
GDF11	0.000852568	0.259615	0.117479	0.0101763
MMADHC	0.000852568	0.259615	0.117479	0.0101763
IL26	0.000852568	0.259615	0.117479	0.0101763
IL22	0.000852568	0.259615	0.117479	0.0101763
SARNP	0.000852568	0.259615	0.117479	0.0101763
FAM91A1	0.00085241	0.461538	0.65043	0.0101763
PDE1B	0.000855776	0.240385	0.103152	0.0101944
PFKM	0.000855776	0.240385	0.103152	0.0101944
FAM134A	0.000855776	0.240385	0.103152	0.0101944
ECH1	0.000871885	0.384615	0.217765	0.0103794
HAS2	0.000880193	0.461538	0.647564	0.0104715
NCOA5	0.000909867	0.548077	0.361032	0.0108103
CHRAC1	0.000909867	0.451923	0.638968	0.0108103
PSMA3	0.000924862	0.0865385	0.0143266	0.0109453
ARID4A	0.000924862	0.0865385	0.0143266	0.0109453
KIAA0586	0.000924862	0.0865385	0.0143266	0.0109453
TIMM9	0.000924862	0.0865385	0.0143266	0.0109453
DACT1	0.000924862	0.0865385	0.0143266	0.0109453
ACTR10	0.000924862	0.0865385	0.0143266	0.0109453
ITGB7	0.000931003	0.221154	0.0916905	0.0110036
USP15	0.000931003	0.221154	0.0916905	0.0110036
C20orf152	0.000940415	0.480769	0.30086	0.0110642
SLA2	0.000940415	0.480769	0.30086	0.0110642
CD40	0.000936941	0.538462	0.355301	0.0110642
CYP4F8	0.000940415	0.480769	0.30086	0.0110642
C20orf24	0.000940415	0.480769	0.30086	0.0110642
SCAND1	0.000940415	0.480769	0.30086	0.0110642
OR1I1	0.000940415	0.480769	0.30086	0.0110642
EIF2C2	0.00095464	0.451923	0.636103	0.0112243
SIRT2	0.000962371	0.394231	0.226361	0.0113079
MMS19	0.000972884	0.115385	0.0286533	0.0114092
MSMB	0.000972884	0.115385	0.0286533	0.0114092
ZDHHC16	0.000972884	0.115385	0.0286533	0.0114092
SLC45A4	0.000974008	0.442308	0.627507	0.0114149
C2orf15	0.000982741	0.259615	0.120344	0.0114432
SENP1	0.000981536	0.240385	0.106017	0.0114432
TXNDC9	0.000982741	0.259615	0.120344	0.0114432
LYG2	0.000982741	0.259615	0.120344	0.0114432
LIPT1	0.000982741	0.259615	0.120344	0.0114432
COL2A1	0.000981536	0.240385	0.106017	0.0114432
MRPL30	0.000982741	0.259615	0.120344	0.0114432
IL1F8	0.000981536	0.240385	0.106017	0.0114432
MITD1	0.000982741	0.259615	0.120344	0.0114432
LYG1	0.000982741	0.259615	0.120344	0.0114432
SAMD12	0.00099521	0.432692	0.618911	0.0115809
TARBP2	0.00100221	0.201923	0.0802292	0.0116027
PER2	0.00100221	0.201923	0.0802292	0.0116027
NPFF	0.00100221	0.201923	0.0802292	0.0116027
ATF7	0.00100221	0.201923	0.0802292	0.0116027
PSG2	0.00100221	0.201923	0.0802292	0.0116027
ILKAP	0.00100221	0.201923	0.0802292	0.0116027
HES6	0.00100221	0.201923	0.0802292	0.0116027
LOC151174	0.00100221	0.201923	0.0802292	0.0116027
GTPBP3	0.00100511	0.442308	0.266476	0.0116213
C19orf62	0.00100511	0.442308	0.266476	0.0116213
RANBP2	0.00101212	0.173077	0.0601719	0.01168
GCC2	0.00101212	0.173077	0.0601719	0.01168
CCDC138	0.00101212	0.173077	0.0601719	0.01168
CPSF1	0.00101838	0.423077	0.610315	0.0117149
GPR172A	0.00101838	0.423077	0.610315	0.0117149
FBXL6	0.00101838	0.423077	0.610315	0.0117149
SLC39A4	0.00101838	0.423077	0.610315	0.0117149
ADCK5	0.00101838	0.423077	0.610315	0.0117149
ZNF707	0.00106622	0.413462	0.598854	0.0120809
ARNTL2	0.00106065	0.490385	0.312321	0.0120809
LOC731779	0.00105498	0.423077	0.60745	0.0120809
POLD1	0.00106615	0.125	0.034384	0.0120809
SFRS16	0.00106507	0.182692	0.0687679	0.0120809
SPIB	0.00106615	0.125	0.034384	0.0120809
MERTK	0.00106507	0.182692	0.0687679	0.0120809
ZNF623	0.00106622	0.413462	0.598854	0.0120809
PTP4A3	0.00105498	0.423077	0.60745	0.0120809
KCNC3	0.00106615	0.125	0.034384	0.0120809
PRKCB	0.00106615	0.125	0.034384	0.0120809
FRAT2	0.00106615	0.125	0.034384	0.0120809
GRINA	0.00106622	0.413462	0.598854	0.0120809
GPR20	0.00105498	0.423077	0.60745	0.0120809
MYH14	0.00106615	0.125	0.034384	0.0120809
NR1H2	0.00106615	0.125	0.034384	0.0120809
FRAT1	0.00106615	0.125	0.034384	0.0120809
NAPSA	0.00106615	0.125	0.034384	0.0120809
KLHDC5	0.00106065	0.490385	0.312321	0.0120809
FAM83H	0.00106622	0.413462	0.598854	0.0120809
NAPSB	0.00106615	0.125	0.034384	0.0120809
MAPK15	0.00106622	0.413462	0.598854	0.0120809
BREA2	0.00106622	0.413462	0.598854	0.0120809
SPATC1	0.00106622	0.413462	0.598854	0.0120809
LY6E	0.00107915	0.403846	0.590258	0.0122198
DDX11	0.00109324	0.451923	0.275072	0.0123715
BRD4	0.00110501	0.5	0.320917	0.012497
hCG_1994695	0.00112027	0.403846	0.587393	0.0125822
PLEC1	0.00112158	0.413462	0.595989	0.0125822
C8orf51	0.00112158	0.413462	0.595989	0.0125822
EPPK1	0.00112158	0.413462	0.595989	0.0125822
PUF60	0.00112158	0.413462	0.595989	0.0125822
SCRIB	0.00112158	0.413462	0.595989	0.0125822
ZC3H3	0.00112158	0.413462	0.595989	0.0125822
CYP11B2	0.00112027	0.403846	0.587393	0.0125822
GSDMD	0.00112158	0.413462	0.595989	0.0125822
GOLSYN	0.0011204	0.394231	0.578797	0.0125822
NRBP2	0.00112158	0.413462	0.595989	0.0125822
PARP10	0.00112158	0.413462	0.595989	0.0125822
RHPN1	0.00112158	0.413462	0.595989	0.0125822
ACTR1B	0.00113231	0.269231	0.126074	0.0126554
COX5B	0.00113231	0.269231	0.126074	0.0126554
CACNB4	0.00113231	0.269231	0.126074	0.0126554
ARL5A	0.00113231	0.269231	0.126074	0.0126554
NUP107	0.00113231	0.269231	0.126074	0.0126554
LYPD6	0.00113231	0.269231	0.126074	0.0126554
GPR37L1	0.00115272	0.451923	0.277937	0.0128597
GHRH	0.00115272	0.451923	0.277937	0.0128597
MANBAL	0.00115272	0.451923	0.277937	0.0128597
PLEKHG2	0.00117378	0.375	0.212034	0.0130625
RPS16	0.00117378	0.375	0.212034	0.0130625
SUPT5H	0.00117378	0.375	0.212034	0.0130625
ZFP36	0.00117378	0.375	0.212034	0.0130625
TMEM106C	0.00117865	0.240385	0.108883	0.0131006
BARD1	0.00117865	0.240385	0.108883	0.0131006
RBL1	0.00118927	0.461538	0.283668	0.0132024
DDX39	0.00118927	0.461538	0.283668	0.0132024
MTSS1	0.00122842	0.490385	0.667622	0.0136202
NDUFB9	0.00122842	0.490385	0.667622	0.0136202
GIPC1	0.00123283	0.461538	0.286533	0.0136357
PTGER1	0.00123283	0.461538	0.286533	0.0136357
OR7C1	0.00123283	0.461538	0.286533	0.0136357
TSPAN11	0.00123283	0.461538	0.286533	0.0136357
TSGA10	0.00124835	0.269231	0.12894	0.0137905
SLC35E3	0.00124835	0.269231	0.12894	0.0137905
WDYHV1	0.0012582	0.471154	0.653295	0.0138909
ABHD3	0.00126319	0.173077	0.0630372	0.0139319
GLT25D1	0.00126346	0.413462	0.246418	0.0139319
CALCOCO1	0.00127521	0.211538	0.0859599	0.0140529
HDAC4	0.00128618	0.192308	0.0744986	0.0141222
CLPTM1	0.00128618	0.192308	0.0744986	0.0141222
RELB	0.00128618	0.192308	0.0744986	0.0141222
APOC4	0.00128618	0.192308	0.0744986	0.0141222
ZC3H6	0.00128618	0.192308	0.0744986	0.0141222
APOC2	0.00128618	0.192308	0.0744986	0.0141222
GPBAR1	0.00131003	0.25	0.114613	0.0142439
ZFC3H1	0.00131003	0.25	0.114613	0.0142439
TPH2	0.00131003	0.25	0.114613	0.0142439
ENTPD4	0.00131848	0.0769231	0.0114613	0.0142439
PNKD	0.00131003	0.25	0.114613	0.0142439
SPG11	0.00131848	0.0769231	0.0114613	0.0142439
ERBB3	0.00130553	0.298077	0.148997	0.0142439
TRIM69	0.00131848	0.0769231	0.0114613	0.0142439
LZTS1	0.00131848	0.0769231	0.0114613	0.0142439
TECR	0.00131852	0.461538	0.289398	0.0142439
DNAJB1	0.00131852	0.461538	0.289398	0.0142439
ATP6V1B2	0.00131848	0.0769231	0.0114613	0.0142439
RPL41	0.00130553	0.298077	0.148997	0.0142439
AAMP	0.00131003	0.25	0.114613	0.0142439
B2M	0.00131848	0.0769231	0.0114613	0.0142439
SLC18A1	0.00131848	0.0769231	0.0114613	0.0142439
PA2G4	0.00130553	0.298077	0.148997	0.0142439
XPOT	0.00131003	0.25	0.114613	0.0142439
TMBIM1	0.00131003	0.25	0.114613	0.0142439
CTDSP1	0.00131003	0.25	0.114613	0.0142439
TBC1D15	0.00131003	0.25	0.114613	0.0142439
SARS2	0.00131789	0.384615	0.22063	0.0142439
ATAD2	0.0013031	0.471154	0.65043	0.0142439
THAP2	0.00131003	0.25	0.114613	0.0142439
ZC3H10	0.00130553	0.298077	0.148997	0.0142439
PATL2	0.00131848	0.0769231	0.0114613	0.0142439
C12orf56	0.00131003	0.25	0.114613	0.0142439
OR7A5	0.00131933	0.471154	0.295129	0.0142442
TTLL4	0.00132618	0.230769	0.100287	0.0142671
LOC283392	0.00132618	0.230769	0.100287	0.0142671
CYP27A1	0.00132618	0.230769	0.100287	0.0142671
ZNF142	0.00132618	0.230769	0.100287	0.0142671
TRHDE	0.00132618	0.230769	0.100287	0.0142671
PRKAG3	0.00132618	0.230769	0.100287	0.0142671
ZNF26	0.00134994	0.144231	0.0458453	0.0145055
ZNF605	0.00134994	0.144231	0.0458453	0.0145055
EPB41L1	0.00138883	0.471154	0.297994	0.0149145
ELMO2	0.00141348	0.538462	0.361032	0.0151074
MYL9	0.0014126	0.480769	0.303725	0.0151074
ILVBL	0.0014126	0.480769	0.303725	0.0151074
SLC13A3	0.00141348	0.538462	0.361032	0.0151074
SYDE1	0.0014126	0.480769	0.303725	0.0151074
TGIF2	0.0014126	0.480769	0.303725	0.0151074
LOC100240726	0.00141348	0.538462	0.361032	0.0151074
SLC35C2	0.00141348	0.538462	0.361032	0.0151074
HNRNPL	0.00142866	0.384615	0.223496	0.0152158
PAK4	0.00142866	0.384615	0.223496	0.0152158
LGALS4	0.00142866	0.384615	0.223496	0.0152158
MRPS12	0.00142866	0.384615	0.223496	0.0152158
NFKBIB	0.00142866	0.384615	0.223496	0.0152158
FBXO17	0.00142866	0.384615	0.223496	0.0152158
DNAJC14	0.0014381	0.269231	0.131805	0.0152714
MMP19	0.0014381	0.269231	0.131805	0.0152714
MDM2	0.0014381	0.269231	0.131805	0.0152714
STAM2	0.0014381	0.269231	0.131805	0.0152714
ORMDL2	0.0014381	0.269231	0.131805	0.0152714
COL6A3	0.00144609	0.211538	0.0888252	0.0153383
ATP5G2	0.00144609	0.211538	0.0888252	0.0153383
RP11-529I10.4	0.00148762	0.105769	0.025788	0.0155778
KCNIP2	0.00148762	0.105769	0.025788	0.0155778
LZTS2	0.00148762	0.105769	0.025788	0.0155778
SFXN3	0.00148762	0.105769	0.025788	0.0155778
KAZALD1	0.00148762	0.105769	0.025788	0.0155778
C10orf76	0.00148762	0.105769	0.025788	0.0155778
MGEA5	0.00148762	0.105769	0.025788	0.0155778
BST2	0.00148223	0.432692	0.26361	0.0155778
NPM3	0.00148762	0.105769	0.025788	0.0155778
PDGFRL	0.00148762	0.105769	0.025788	0.0155778
TLX1	0.00148762	0.105769	0.025788	0.0155778
SLC7A2	0.00148762	0.105769	0.025788	0.0155778
FGF8	0.00148762	0.105769	0.025788	0.0155778
NT5C2	0.00148762	0.105769	0.025788	0.0155778
BMP4	0.00148762	0.105769	0.025788	0.0155778
TIMM23	0.00148762	0.105769	0.025788	0.0155778
C10orf2	0.00148762	0.105769	0.025788	0.0155778
SEMA4G	0.00148762	0.105769	0.025788	0.0155778
PDZD7	0.00148762	0.105769	0.025788	0.0155778
FBXW4	0.00148762	0.105769	0.025788	0.0155778
MRPL43	0.00148762	0.105769	0.025788	0.0155778
USMG5	0.00148762	0.105769	0.025788	0.0155778
SLC11A1	0.00149961	0.25	0.117479	0.0156671
RPAP3	0.00149961	0.25	0.117479	0.0156671
RND3	0.00149961	0.25	0.117479	0.0156671
EPC2	0.00149961	0.25	0.117479	0.0156671
SRGAP1	0.00150946	0.230769	0.103152	0.0157066
TMEM5	0.00150946	0.230769	0.103152	0.0157066
IL1RL1	0.00150946	0.230769	0.103152	0.0157066
TNS1	0.00150946	0.230769	0.103152	0.0157066
EIF4EBP1	0.00150946	0.230769	0.103152	0.0157066
PLCD4	0.00150946	0.230769	0.103152	0.0157066
GRASP	0.00150946	0.230769	0.103152	0.0157066
RAD21	0.00153664	0.423077	0.604585	0.015971
C8orf30A	0.00153664	0.423077	0.604585	0.015971
MRPS35	0.00154477	0.490385	0.315186	0.0160463
LOC284749	0.0015472	0.557692	0.381089	0.0160623
NAV3	0.00155778	0.192308	0.0773639	0.0161443
SYT1	0.00155778	0.192308	0.0773639	0.0161443
PSG5	0.00155778	0.192308	0.0773639	0.0161443
ADCY8	0.00156271	0.519231	0.690544	0.0161862
PAX8	0.00157218	0.278846	0.137536	0.0162656
LOC654433	0.00157218	0.278846	0.137536	0.0162656
UTP23	0.00157627	0.423077	0.601719	0.0162893
SALL4	0.00157627	0.576923	0.398281	0.0162893
TSTA3	0.00159389	0.413462	0.593123	0.0163593
EEF1D	0.00159389	0.413462	0.593123	0.0163593
OCEL1	0.00158982	0.432692	0.266476	0.0163593
NR2F6	0.00158982	0.432692	0.266476	0.0163593
SYT2	0.00158982	0.432692	0.266476	0.0163593
PYCRL	0.00159389	0.413462	0.593123	0.0163593
PLVAP	0.00158982	0.432692	0.266476	0.0163593
NAPRT1	0.00159389	0.413462	0.593123	0.0163593
C8orf73	0.00159389	0.413462	0.593123	0.0163593
ZFP41	0.00159389	0.413462	0.593123	0.0163593
TIGD5	0.00159389	0.413462	0.593123	0.0163593
GLI4	0.00159389	0.413462	0.593123	0.0163593
TMEM38A	0.00160575	0.442308	0.272206	0.0164717
CYP11B1	0.00161374	0.403846	0.584527	0.0165443
ZNF473	0.00163378	0.134615	0.0401146	0.0167119
STAMBPL1	0.00163378	0.134615	0.0401146	0.0167119
FLJ26850	0.00163378	0.134615	0.0401146	0.0167119
ANKRD22	0.00163378	0.134615	0.0401146	0.0167119
EXOSC1	0.00164098	0.115385	0.0315186	0.0167382
PGAM1	0.00164098	0.115385	0.0315186	0.0167382
CHP2	0.00164098	0.115385	0.0315186	0.0167382
ARHGAP19	0.00164098	0.115385	0.0315186	0.0167382
LCOR	0.00164098	0.115385	0.0315186	0.0167382
LYNX1	0.0016596	0.403846	0.581662	0.0168151
CYC1	0.00166139	0.423077	0.598854	0.0168151
EIF3H	0.00166139	0.423077	0.598854	0.0168151
SNRPD1	0.00165341	0.173077	0.0659026	0.0168151
LY6D	0.0016596	0.403846	0.581662	0.0168151
GML	0.0016596	0.403846	0.581662	0.0168151
KCNG1	0.00166153	0.605769	0.426934	0.0168151
ENY2	0.00166153	0.394231	0.573066	0.0168151
ANAPC1	0.00165341	0.173077	0.0659026	0.0168151
SHARPIN	0.00166139	0.423077	0.598854	0.0168151
OPLAH	0.00166139	0.423077	0.598854	0.0168151
MAF1	0.00166139	0.423077	0.598854	0.0168151
ESCO1	0.00165341	0.173077	0.0659026	0.0168151
KIAA1875	0.00166139	0.423077	0.598854	0.0168151
NUDCD1	0.0016655	0.384615	0.56447	0.0168459
ZNF572	0.00169148	0.5	0.673352	0.017061
SQLE	0.00169148	0.5	0.673352	0.017061
LOC157381	0.00169148	0.5	0.673352	0.017061
KIAA0196	0.00169148	0.5	0.673352	0.017061
NSMCE2	0.00169148	0.5	0.673352	0.017061
LGR6	0.0016942	0.442308	0.275072	0.0170789
MDM1	0.00172387	0.259615	0.123209	0.0173586
RIF1	0.00172387	0.259615	0.123209	0.0173586
ZNF234	0.00172982	0.211538	0.0916905	0.0173895
ZNF226	0.00172982	0.211538	0.0916905	0.0173895
ZNF233	0.00172982	0.211538	0.0916905	0.0173895
MOCS3	0.00173407	0.605769	0.429799	0.0174226
RPN2	0.00173944	0.451923	0.280802	0.0174571
C20orf132	0.00173944	0.451923	0.280802	0.0174571
RQCD1	0.00179684	0.230769	0.106017	0.0180132
IL1F6	0.00179684	0.230769	0.106017	0.0180132
NDUFB7	0.00180625	0.451923	0.283668	0.0180975
TNFRSF10A	0.00182774	0.0673077	0.00859599	0.0182522
RHOBTB2	0.00182774	0.0673077	0.00859599	0.0182522
SLC39A14	0.00182774	0.0673077	0.00859599	0.0182522
TNFRSF10C	0.00182774	0.0673077	0.00859599	0.0182522
TNFRSF10B	0.00182774	0.0673077	0.00859599	0.0182522
TNFRSF10D	0.00182774	0.0673077	0.00859599	0.0182522
PAF1	0.00185376	0.375	0.2149	0.0184573
GMFG	0.00185376	0.375	0.2149	0.0184573
GRB14	0.0018544	0.307692	0.163324	0.0184573
SAMD4B	0.00185376	0.375	0.2149	0.0184573
MED29	0.00185376	0.375	0.2149	0.0184573
LRFN1	0.00185376	0.375	0.2149	0.0184573
C14orf37	0.00186832	0.0865385	0.017192	0.0185448
C14orf39	0.00186832	0.0865385	0.017192	0.0185448
SIX1	0.00186832	0.0865385	0.017192	0.0185448
SIX4	0.00186832	0.0865385	0.017192	0.0185448
SLC35F4	0.00186832	0.0865385	0.017192	0.0185448
PGAM5	0.0018791	0.144231	0.0487106	0.018611
ZNF84	0.0018791	0.144231	0.0487106	0.018611
ANKLE2	0.0018791	0.144231	0.0487106	0.018611
PXMP2	0.0018791	0.144231	0.0487106	0.018611
NMI	0.00189145	0.259615	0.126074	0.0186924
NEB	0.00189145	0.259615	0.126074	0.0186924
TNFAIP6	0.00189145	0.259615	0.126074	0.0186924
RBM43	0.00189145	0.259615	0.126074	0.0186924
C8orf76	0.00190774	0.480769	0.653295	0.0188225
ZHX1	0.00190774	0.480769	0.653295	0.0188225
FAM83A	0.00190774	0.480769	0.653295	0.0188225
WDR67	0.00191789	0.471154	0.647564	0.0189021
DERL1	0.00191789	0.471154	0.647564	0.0189021
LOC440944	0.00192525	0.0288462	0.12894	0.0189145
SETD5	0.00192525	0.0288462	0.12894	0.0189145
IPO8	0.00192646	0.461538	0.292264	0.0189145
TLX3	0.00192525	0.0288462	0.12894	0.0189145
FBXW11	0.00192525	0.0288462	0.12894	0.0189145
RANBP17	0.00192525	0.0288462	0.12894	0.0189145
FAR2	0.00192646	0.461538	0.292264	0.0189145
RNPEP	0.00193127	0.451923	0.286533	0.0189514
IL29	0.00194105	0.375	0.217765	0.019037
CDH22	0.00196501	0.528846	0.355301	0.0192615
MALL	0.00197885	0.163462	0.0601719	0.0193867
ESPNL	0.00198632	0.201923	0.0830946	0.0193969
PSG7	0.00198632	0.201923	0.0830946	0.0193969
PSG11	0.00198632	0.201923	0.0830946	0.0193969
SCLY	0.00198632	0.201923	0.0830946	0.0193969
UBE2F	0.00198632	0.201923	0.0830946	0.0193969
DPP10	0.00198632	0.201923	0.0830946	0.0193969
ORC4L	0.00199831	0.240385	0.111748	0.0194929
USP37	0.00199831	0.240385	0.111748	0.0194929
SEL1L2	0.00200536	0.413462	0.252149	0.0195511
MGC16025	0.00201279	0.182692	0.0716332	0.0195709
GLTP	0.00201279	0.182692	0.0716332	0.0195709
TCHP	0.00201279	0.182692	0.0716332	0.0195709
TMEM87B	0.00201279	0.182692	0.0716332	0.0195709
FBLN7	0.00201279	0.182692	0.0716332	0.0195709
SLC2A10	0.00202603	0.538462	0.363897	0.0196785
TP53RK	0.00202603	0.538462	0.363897	0.0196785
CAPRIN2	0.0020295	0.461538	0.295129	0.0196911
SAMHD1	0.0020295	0.461538	0.295129	0.0196911
MON2	0.00204128	0.221154	0.0974212	0.0197842
SGPP2	0.00204128	0.221154	0.0974212	0.0197842
CYP4F3	0.00205527	0.471154	0.30086	0.0198984
NDRG3	0.00205527	0.471154	0.30086	0.0198984
IL28A	0.00210046	0.375	0.22063	0.0203033
STEAP2	0.00209937	0.346154	0.194842	0.0203033
SYCN	0.00210046	0.375	0.22063	0.0203033
PTK2	0.00210634	0.461538	0.633238	0.0203384
ZNF334	0.00210634	0.538462	0.366762	0.0203384
LOC647979	0.00213406	0.471154	0.303725	0.0205951
NXNL1	0.00216425	0.423077	0.260745	0.0208531
SLC27A1	0.00216425	0.423077	0.260745	0.0208531
FAM125A	0.00216425	0.423077	0.260745	0.0208531
FBXO27	0.00216544	0.384615	0.226361	0.0208534
LRRFIP1	0.00223291	0.201923	0.0859599	0.0213441
KCNN4	0.00223291	0.201923	0.0859599	0.0213441
RAMP1	0.00223291	0.201923	0.0859599	0.0213441
AMHR2	0.00223291	0.201923	0.0859599	0.0213441
PSG6	0.00223291	0.201923	0.0859599	0.0213441
IRGC	0.00223291	0.201923	0.0859599	0.0213441
MLPH	0.00223291	0.201923	0.0859599	0.0213441
RAB17	0.00223291	0.201923	0.0859599	0.0213441
ZNF221	0.00223291	0.201923	0.0859599	0.0213441
CTAGE1	0.00223291	0.201923	0.0859599	0.0213441
ZNF155	0.00223291	0.201923	0.0859599	0.0213441
C19orf61	0.00223291	0.201923	0.0859599	0.0213441
PRLH	0.00223291	0.201923	0.0859599	0.0213441
ZNF404	0.00223291	0.201923	0.0859599	0.0213441
NOTCH3	0.00224535	0.480769	0.312321	0.0214517
FAM178A	0.0022687	0.0961538	0.0229226	0.0215889
VIL1	0.00227164	0.240385	0.114613	0.0215889
C14orf176	0.00227164	0.240385	0.114613	0.0215889
LANCL1	0.00227164	0.240385	0.114613	0.0215889
CPS1	0.00227164	0.240385	0.114613	0.0215889
ACADL	0.00227164	0.240385	0.114613	0.0215889
MYL1	0.00227164	0.240385	0.114613	0.0215889
MAP2	0.00227164	0.240385	0.114613	0.0215889
CCDC25	0.0022687	0.0961538	0.0229226	0.0215889
STMN4	0.0022687	0.0961538	0.0229226	0.0215889
FAM49B	0.0022774	0.528846	0.69341	0.021621
GSDMC	0.0022774	0.528846	0.69341	0.021621
PREX1	0.00228146	0.557692	0.386819	0.0216481
C7orf63	0.00228793	0.346154	0.197708	0.0216868
STEAP1	0.00228793	0.346154	0.197708	0.0216868
CCDC140	0.00230579	0.221154	0.100287	0.0217876
GOT1L1	0.00230579	0.221154	0.100287	0.0217876
ADRB3	0.00230579	0.221154	0.100287	0.0217876
PAX3	0.00230579	0.221154	0.100287	0.0217876
C12orf44	0.00230579	0.221154	0.100287	0.0217876
MGC13005	0.00230579	0.221154	0.100287	0.0217876
TOP1MT	0.00232663	0.423077	0.595989	0.0219045
GPAA1	0.00232663	0.423077	0.595989	0.0219045
ATP9A	0.00232663	0.576923	0.404011	0.0219045
EXOSC4	0.00232663	0.423077	0.595989	0.0219045
ZNF16	0.00232663	0.423077	0.595989	0.0219045
ZNF696	0.00232663	0.423077	0.595989	0.0219045
NFATC2	0.00232663	0.576923	0.404011	0.0219045
IDH1	0.00236262	0.269231	0.13467	0.022196
CPM	0.00236262	0.269231	0.13467	0.022196
CRYGC	0.00236262	0.269231	0.13467	0.022196
CRYGD	0.00236262	0.269231	0.13467	0.022196
EPHX3	0.00236374	0.490385	0.320917	0.022196
AKT2	0.00238562	0.317308	0.174785	0.0223436
PTPN12	0.00238562	0.317308	0.174785	0.0223436
SPATA2	0.00238273	0.596154	0.421203	0.0223436
MAP3K10	0.00238562	0.317308	0.174785	0.0223436
CNTD2	0.00238562	0.317308	0.174785	0.0223436
POLR1B	0.0024096	0.182692	0.0744986	0.0225565
CSE1L	0.00242808	0.576923	0.406877	0.0226915
STAU1	0.00242808	0.576923	0.406877	0.0226915
SLC9A8	0.0024303	0.596154	0.424069	0.0226915
TRPS1	0.00242808	0.423077	0.593123	0.0226915
GPIHBP1	0.0024303	0.403846	0.575931	0.0226915
DPM1	0.00243507	0.605769	0.432665	0.0227126
KCNV1	0.00243507	0.394231	0.567335	0.0227126
PTPN7	0.00251943	0.442308	0.277937	0.0232269
CDKN3	0.002521	0.105769	0.0286533	0.0232269
C19orf42	0.00251943	0.442308	0.277937	0.0232269
NDUFB8	0.002521	0.105769	0.0286533	0.0232269
CGRRF1	0.002521	0.105769	0.0286533	0.0232269
CPN1	0.002521	0.105769	0.0286533	0.0232269
SFRP5	0.002521	0.105769	0.0286533	0.0232269
PI4K2A	0.002521	0.105769	0.0286533	0.0232269
SEC31B	0.002521	0.105769	0.0286533	0.0232269
NCOA4	0.002521	0.105769	0.0286533	0.0232269
MTUS1	0.002521	0.105769	0.0286533	0.0232269
MTMR7	0.002521	0.105769	0.0286533	0.0232269
HIF1AN	0.002521	0.105769	0.0286533	0.0232269
AVPI1	0.002521	0.105769	0.0286533	0.0232269
UBTD1	0.002521	0.105769	0.0286533	0.0232269
ANKRD2	0.002521	0.105769	0.0286533	0.0232269
MARVELD1	0.002521	0.105769	0.0286533	0.0232269
AS3MT	0.002521	0.105769	0.0286533	0.0232269
ZFYVE27	0.002521	0.105769	0.0286533	0.0232269
ARL8A	0.00251943	0.442308	0.277937	0.0232269
VPS37A	0.002521	0.105769	0.0286533	0.0232269
MORN4	0.002521	0.105769	0.0286533	0.0232269
DHDPSL	0.002521	0.105769	0.0286533	0.0232269
C10orf62	0.002521	0.105769	0.0286533	0.0232269
LOC541471	0.00254861	0.153846	0.0544413	0.0234573
PPP5C	0.00254861	0.153846	0.0544413	0.0234573
NKPD1	0.00255715	0.163462	0.0630372	0.0234762
TRAPPC6A	0.00255715	0.163462	0.0630372	0.0234762
NPHP1	0.00255715	0.163462	0.0630372	0.0234762
MARK4	0.00255715	0.163462	0.0630372	0.0234762
BLOC1S3	0.00255715	0.163462	0.0630372	0.0234762
TBK1	0.00260402	0.25	0.120344	0.0238944
FZD5	0.00261157	0.269231	0.137536	0.0239152
CRYGA	0.00261157	0.269231	0.137536	0.0239152
CRYGB	0.00261157	0.269231	0.137536	0.0239152
C2orf80	0.00261157	0.269231	0.137536	0.0239152
RRP12	0.00262735	0.125	0.0372493	0.0240353
ATAD1	0.00262735	0.125	0.0372493	0.0240353
ZNF230	0.00264463	0.201923	0.0888252	0.0240839
KRT5	0.00264463	0.201923	0.0888252	0.0240839
ZNF222	0.00264463	0.201923	0.0888252	0.0240839
ZNF223	0.00264463	0.201923	0.0888252	0.0240839
ZNF45	0.00264463	0.201923	0.0888252	0.0240839
PHYHIPL	0.00264463	0.201923	0.0888252	0.0240839
KRT71	0.00264463	0.201923	0.0888252	0.0240839
LYPD5	0.00264463	0.201923	0.0888252	0.0240839
ZNF284	0.00264463	0.201923	0.0888252	0.0240839
FLRT3	0.00270534	0.394231	0.240688	0.0246243
ZNF780B	0.00271099	0.326923	0.183381	0.0246509
ZNF780A	0.00271099	0.326923	0.183381	0.0246509
C12orf61	0.00272066	0.221154	0.103152	0.0246522
NR4A1	0.00272066	0.221154	0.103152	0.0246522
PHF3	0.00272066	0.221154	0.103152	0.0246522
BRF2	0.00272066	0.221154	0.103152	0.0246522
RAB11FIP1	0.00272066	0.221154	0.103152	0.0246522
LGSN	0.00272066	0.221154	0.103152	0.0246522
GPR124	0.00272066	0.221154	0.103152	0.0246522
SLC25A37	0.00277387	0.0769231	0.0143266	0.0251217
[truncated: 521 more rows]
