# Supplementary material for: Deregulation of MYCN, LIN28B and LET7 in a Molecular Subtype of Aggressive High-Grade Serous Ovarian Cancers
Source: PLoS One. 2011 Apr 13;6(4):e18064. doi: 10.1371/journal.pone.0018064 (PMC3076323; doi:10.1371/journal.pone.0018064)
Supplement: Table S5 — miRNA locus significantly lost in C5 subtypes. (XLS) [file pone.0018064.s011.xls]

## Sheet: let7-res
Supplementary Table 5: miRNA locus significantly lost in C5 subtypes
miRNA	Proportion (C5)	Proportion (NonC5)	pvals	adj.Pvals
hsa-let-7a-1	0.230769	0.174785	0.200659	0.315321
hsa-let-7a-2	0.105769	0.103152	1	1
hsa-let-7a-3	0.567308	0.409742	0.00500876	0.0183654
hsa-let-7b	0.567308	0.409742	0.00500876	0.0183654
hsa-let-7c	0.192308	0.103152	0.0260137	0.0715377
hsa-let-7d	0.230769	0.174785	0.200659	0.315321
hsa-let-7e	0.173077	0.169054	1	1
hsa-let-7f-1	0.230769	0.174785	0.200659	0.315321
hsa-let-7f-2	0.480769	0.318052	0.00339051	0.0183654
hsa-let-7g	0.0673077	0.0773639	0.834605	1
hsa-let-7i	0.0673077	0.0573066	0.644648	0.886391
