# Supplementary material for: Deregulation of MYCN, LIN28B and LET7 in a Molecular Subtype of Aggressive High-Grade Serous Ovarian Cancers
Source: PLoS One. 2011 Apr 13;6(4):e18064. doi: 10.1371/journal.pone.0018064 (PMC3076323; doi:10.1371/journal.pone.0018064)
Supplement: Table S7 — (XLS) [file pone.0018064.s013.xls]

## Sheet: Supplementary Table N
	KEGG Pathway ID	Number of Genes	Number of Differentially Expressed Genes			Pathway Status
Name	ID	pSize	NDE	pGFdr	pGFWER	Status
Let7 Pathway	Let7	13	6	2.11119e-07	2.11119e-07	Inhibited
Wnt signaling pathway	4310	149	9	0.0023658	0.00473159	Activated
Colorectal cancer	5210	84	6	0.0130119	0.0568926	Inhibited
Basal cell carcinoma	5217	54	5	0.0130119	0.0615166	Activated
Melanogenesis	4916	101	6	0.0130119	0.0650595	Activated
ECM-receptor interaction	4512	83	4	0.0242935	0.145761	Activated
Small cell lung cancer	5222	86	2	0.0303269	0.212288	Activated
Focal adhesion	4510	190	5	0.276151	1	Activated
Pathogenic Escherichia coli in	5130	49	1	0.320488	1	Activated
Arrhythmogenic right ventricul	5412	73	3	0.601199	1	Inhibited
Axon guidance	4360	129	3	0.975269	1	Activated
Thyroid cancer	5216	29	1	0.975269	1	Activated
TGF-beta signaling pathway	4350	84	2	0.975269	1	Activated
Melanoma	5218	71	2	0.975269	1	Activated
Long-term depression	4730	68	2	0.975269	1	Activated
p53 signaling pathway	4115	68	2	0.975269	1	Inhibited
Cell cycle	4110	124	1	0.975269	1	Inhibited
Adipocytokine signaling pathwa	4920	66	1	0.975269	1	Inhibited
Gap junction	4540	89	2	0.975269	1	Inhibited
Jak-STAT signaling pathway	4630	153	3	0.975269	1	Inhibited
Neurotrophin signaling pathway	4722	125	1	0.975269	1	Activated
mTOR signaling pathway	4150	51	1	0.975269	1	Inhibited
Endometrial cancer	5213	52	1	0.975269	1	Activated
Insulin signaling pathway	4910	137	1	0.975269	1	Inhibited
Regulation of actin cytoskelet	4810	202	2	0.975269	1	Activated
Regulation of autophagy	4140	32	1	0.975269	1	Inhibited
Prion diseases	5020	36	1	0.975269	1	Inhibited
Cytokine-cytokine receptor int	4060	254	3	0.975269	1	Inhibited
Hedgehog signaling pathway	4340	55	1	0.975269	1	Inhibited
Acute myeloid leukemia	5221	57	1	0.975269	1	Inhibited
MAPK signaling pathway	4010	263	3	0.975269	1	Inhibited
Glioma	5214	65	1	0.975269	1	Activated
Huntington's disease	5016	169	2	0.975269	1	Inhibited
Long-term potentiation	4720	70	1	0.975269	1	Inhibited
Renal cell carcinoma	5211	69	1	0.975269	1	Inhibited
Fc gamma R-mediated phagocytos	4666	91	1	0.975269	1	Activated
Dilated cardiomyopathy	5414	89	1	0.975269	1	Inhibited
GnRH signaling pathway	4912	98	1	0.975269	1	Inhibited
Progesterone-mediated oocyte m	4914	104	1	0.975269	1	Inhibited
Chemokine signaling pathway	4062	179	1	0.975269	1	Inhibited
Vascular smooth muscle contrac	4270	111	1	0.975269	1	Inhibited
Parkinson's disease	5012	113	1	0.975269	1	Inhibited
Alzheimer's disease	5010	158	1	0.980529	1	Inhibited
Calcium signaling pathway	4020	177	1	0.980529	1	Inhibited
