# Supplementary material for: Deregulation of MYCN, LIN28B and LET7 in a Molecular Subtype of Aggressive High-Grade Serous Ovarian Cancers
Source: PLoS One. 2011 Apr 13;6(4):e18064. doi: 10.1371/journal.pone.0018064 (PMC3076323; doi:10.1371/journal.pone.0018064)
Supplement: Table S9 — (XLS) [file pone.0018064.s015.xls]

## Sheet: C1 signature genes
ID	geneSymbol	logFC	P.Value	adj.P.Val	B
210511_s_at	INHBA	3.19703	6.40072e-53	1.25595e-48	109.742
228396_at	PRKG1	1.70814	3.90338e-52	3.8296e-48	107.955
235182_at	ISM1	2.61447	4.40914e-51	2.88387e-47	105.558
212488_at	COL5A1	2.91557	8.0376e-51	3.94285e-47	104.964
226997_at	ADAMTS12	2.34824	4.32261e-50	1.69636e-46	103.3
209955_s_at	FAP	3.35228	3.49713e-49	1.14368e-45	101.232
223122_s_at	SFRP2	4.93847	2.16264e-48	6.0622e-45	99.4296
202766_s_at	FBN1	2.57307	2.62022e-48	6.42676e-45	99.2397
221729_at	COL5A2	2.89642	3.17171e-48	6.91503e-45	99.0507
37892_at	COL11A1	4.59707	6.86434e-48	1.34692e-44	98.2868
203083_at	THBS2	3.41132	9.03944e-47	1.61247e-43	95.7358
226695_at	PRRX1	3.10466	1.8619e-46	3.04452e-43	95.0207
227566_at	NTM	3.24132	2.58926e-46	3.90819e-43	94.6943
205100_at	GFPT2	1.62118	4.04554e-46	5.67011e-43	94.2526
219087_at	ASPN	3.43926	4.89293e-46	6.40061e-43	94.0644
201792_at	AEBP1	2.38387	9.62072e-46	1.17986e-42	93.3951
218469_at	GREM1	3.27116	1.79024e-45	2.06636e-42	92.7804
215446_s_at	LOX	3.20352	1.94887e-45	2.12449e-42	92.6964
213909_at	LRRC15	2.72891	2.14393e-45	2.21412e-42	92.602
204464_s_at	EDNRA	2.37523	8.85298e-45	8.68566e-42	91.1982
219561_at	COPZ2	1.26226	4.60001e-44	4.29816e-41	89.5667
223278_at	GJB2	3.31115	6.66096e-44	5.94097e-41	89.2002
202952_s_at	ADAM12	2.17512	7.48751e-44	6.38782e-41	89.0844
213905_x_at	BGN	1.89104	1.11107e-43	9.08396e-41	88.6936
221541_at	CRISPLD2	2.60286	2.22407e-43	1.74563e-40	88.0064
209621_s_at	PDLIM3	2.04323	3.18813e-43	2.40605e-40	87.6499
227399_at	VGLL3	2.07495	3.89233e-43	2.82872e-40	87.4523
213338_at	TMEM158	2.61899	6.01716e-43	4.21674e-40	87.021
203878_s_at	MMP11	2.61568	1.46188e-42	9.89138e-40	86.1419
214587_at	COL8A1	1.99952	3.06942e-42	2.0076e-39	85.4074
200665_s_at	SPARC	1.71618	3.87e-42	2.44958e-39	85.1779
213247_at	SVEP1	1.79826	6.92309e-42	4.24516e-39	84.6019
206439_at	EPYC	4.16112	2.6594e-41	1.58129e-38	83.2691
201069_at	MMP2	2.33834	8.41048e-41	4.85383e-38	82.1287
205941_s_at	COL10A1	2.78089	1.76454e-40	9.89252e-38	81.3948
222379_at	KCNE4	1.45206	7.43558e-40	4.0528e-37	79.9701
242100_at	CHSY3	1.14249	8.61723e-40	4.56993e-37	79.824
209365_s_at	ECM1	1.53632	1.20525e-39	6.22352e-37	79.4917
213001_at	ANGPTL2	1.61971	1.41995e-39	7.14415e-37	79.3293
205479_s_at	PLAU	2.13288	1.62458e-39	7.96937e-37	79.196
204620_s_at	VCAN	2.82186	2.14197e-39	1.02511e-36	78.9221
218638_s_at	SPON2	1.48967	2.95011e-39	1.37826e-36	78.605
202994_s_at	FBLN1	1.88561	4.32767e-39	1.97482e-36	78.2254
216442_x_at	FN1	2.28686	8.38355e-39	3.73868e-36	77.5704
228367_at	ALPK2	1.85357	8.72737e-39	3.80552e-36	77.5306
222484_s_at	CXCL14	3.33377	1.32793e-38	5.66447e-36	77.1148
205700_at	HSD17B6	1.78952	1.42624e-38	5.95441e-36	77.044
222899_at	ITGA11	1.33429	1.78182e-38	7.24911e-36	76.8235
228082_at	ASAM	1.17443	1.81024e-38	7.24911e-36	76.8079
221447_s_at	GLT8D2	1.79029	1.96962e-38	7.72959e-36	76.7243
202450_s_at	CTSK	2.65042	2.41574e-38	9.29445e-36	76.522
204451_at	FZD1	1.64535	3.03159e-38	1.14396e-35	76.2971
201150_s_at	TIMP3	2.63377	3.66942e-38	1.35852e-35	76.1079
204589_at	NUAK1	2.07491	1.00727e-37	3.66011e-35	75.1075
221019_s_at	COLEC12	2.11048	1.05446e-37	3.76194e-35	75.0622
225242_s_at	CCDC80	2.78662	1.16684e-37	4.08851e-35	74.9619
213139_at	SNAI2	2.3234	1.26088e-37	4.34053e-35	74.8851
223276_at	MST150	1.20578	1.35225e-37	4.57482e-35	74.8158
201307_at	2011-09-01	1.17602	1.41044e-37	4.6908e-35	74.774
213125_at	OLFML2B	2.01696	4.27825e-37	1.39913e-34	73.6747
200974_at	ACTA2	2.09476	6.41251e-37	2.06273e-34	73.2738
206227_at	CILP	2.24172	7.93743e-37	2.51207e-34	73.0624
208789_at	PTRF	1.33857	8.59888e-37	2.67821e-34	72.9831
226930_at	FNDC1	2.66619	9.08523e-37	2.78547e-34	72.9286
225782_at	MSRB3	2.00446	9.36698e-37	2.82767e-34	72.8983
202273_at	PDGFRB	1.3742	1.09779e-36	3.24998e-34	72.7411
219655_at	C7orf10	1.84433	1.10972e-36	3.24998e-34	72.7304
202283_at	SERPINF1	2.36574	3.85945e-36	1.11368e-33	71.4956
224694_at	ANTXR1	1.81349	4.11931e-36	1.17144e-33	71.431
222449_at	PMEPA1	1.85248	6.1784e-36	1.7319e-33	71.0294
225681_at	CTHRC1	2.67172	6.33047e-36	1.74953e-33	71.0053
223571_at	C1QTNF6	1.00455	6.56542e-36	1.78926e-33	70.9692
210139_s_at	PMP22	1.65072	6.77741e-36	1.82173e-33	70.9377
213725_x_at	XYLT1	1.38482	1.43611e-35	3.80802e-33	70.1937
203180_at	ALDH1A3	2.30374	2.15864e-35	5.64758e-33	69.7899
202403_s_at	COL1A2	1.81523	2.34435e-35	6.05275e-33	69.7082
215076_s_at	COL3A1	1.946	4.47657e-35	1.14077e-32	69.0673
212077_at	CALD1	1.35802	7.47966e-35	1.88161e-32	68.5587
236738_at	LOC401097	1.41188	8.07835e-35	2.0065e-32	68.4824
225464_at	FRMD6	1.71217	8.78363e-35	2.1544e-32	68.3995
219874_at	SLC12A8	1.56545	1.05308e-34	2.55105e-32	68.2197
217763_s_at	RAB31	1.59194	1.34026e-34	3.20713e-32	67.9808
210809_s_at	POSTN	4.32356	1.4891e-34	3.52038e-32	67.8765
201389_at	ITGA5	1.10848	1.88885e-34	4.41227e-32	67.6409
234994_at	TMEM200A	1.98991	2.28838e-34	5.28265e-32	67.4508
202998_s_at	LOXL2	1.8345	3.04202e-34	6.94076e-32	67.1687
205117_at	FGF1	1.16044	5.01793e-34	1.13175e-31	66.6728
218656_s_at	LHFP	1.74639	6.22043e-34	1.38702e-31	66.46
213496_at	LPPR4	1.75215	1.327e-33	2.92567e-31	65.7093
221911_at	ETV1	2.13329	1.37206e-33	2.9914e-31	65.6762
203570_at	LOXL1	1.78191	1.86931e-33	4.03073e-31	65.3698
201109_s_at	THBS1	2.24756	2.32411e-33	4.95692e-31	65.1541
206101_at	ECM2	1.93636	2.45559e-33	5.18104e-31	65.0995
200897_s_at	PALLD	1.53145	2.48712e-33	5.19173e-31	65.0869
213933_at	PTGER3	1.4622	2.971e-33	6.13653e-31	64.9108
202202_s_at	LAMA4	1.7654	4.58355e-33	9.36859e-31	64.4812
212256_at	GALNT10	1.33847	6.25506e-33	1.26533e-30	64.1731
226047_at	MRVI1	1.49249	7.18771e-33	1.43915e-30	64.0354
220988_s_at	C1QTNF3	1.83132	1.02074e-32	2.02313e-30	63.6879
205907_s_at	OMD	1.98781	1.93528e-32	3.79741e-30	63.0541
219257_s_at	SPHK1	1.00625	3.16148e-32	6.14203e-30	62.5679
206025_s_at	TNFAIP6	1.95444	3.32363e-32	6.39376e-30	62.5183
221898_at	PDPN	1.69521	5.60325e-32	1.06745e-29	62.0009
206796_at	WISP1	1.40671	1.0782e-31	2.02165e-29	61.3524
225275_at	EDIL3	2.14422	1.08182e-31	2.02165e-29	61.3491
37005_at	NBL1	1.59021	1.34632e-31	2.49222e-29	61.1324
204114_at	NID2	1.91269	1.77029e-31	3.21635e-29	60.8611
219179_at	DACT1	1.66171	1.9309e-31	3.47598e-29	60.7751
204955_at	SRPX	1.93465	2.63182e-31	4.69469e-29	60.4683
209651_at	TGFB1I1	1.79429	5.66369e-31	1.0012e-28	59.709
213069_at	HEG1	1.26558	6.73401e-31	1.17977e-28	59.5375
201744_s_at	LUM	2.77721	7.8285e-31	1.35939e-28	59.3883
225664_at	COL12A1	2.31038	1.33452e-30	2.27703e-28	58.8599
201438_at	COL6A3	2.1987	1.79882e-30	3.04281e-28	58.5641
225524_at	ANTXR2	1.64346	1.99993e-30	3.35408e-28	58.4591
207173_x_at	CDH11	2.40225	2.87611e-30	4.74243e-28	58.0992
205713_s_at	COMP	2.82648	4.79083e-30	7.70539e-28	57.5937
214043_at	PTPRD	1.75279	7.28288e-30	1.16183e-27	57.1788
61734_at	RCN3	1.22553	7.48371e-30	1.18424e-27	57.1518
230493_at	SHISA2	2.14489	8.96869e-30	1.40787e-27	56.9725
204163_at	EMILIN1	1.43293	9.09342e-30	1.41612e-27	56.9588
202274_at	ACTG2	1.98802	1.06675e-29	1.64817e-27	56.8007
204051_s_at	SFRP4	2.76815	1.09876e-29	1.68437e-27	56.7714
205499_at	SRPX2	1.59469	1.13654e-29	1.72877e-27	56.7379
228293_at	DEPDC7	1.28351	1.19349e-29	1.80144e-27	56.6894
203939_at	NT5E	2.21063	1.47624e-29	2.19445e-27	56.4788
209325_s_at	RGS16	1.20953	1.87921e-29	2.77247e-27	56.2397
220918_at	C21orf96	1.34549	3.16637e-29	4.63661e-27	55.7229
204345_at	COL16A1	1.3993	4.17739e-29	6.07175e-27	55.4484
212423_at	ZCCHC24	1.37251	5.00211e-29	7.21702e-27	55.27
218162_at	OLFML3	1.69057	7.993e-29	1.13651e-26	54.8057
1552289_a_at	CILP2	1.47878	9.13759e-29	1.28991e-26	54.6731
208782_at	FSTL1	1.33208	9.26399e-29	1.29841e-26	54.6595
205330_at	MN1	1.67108	9.64175e-29	1.33233e-26	54.6199
201105_at	LGALS1	1.17907	1.01108e-28	1.38737e-26	54.5729
212412_at	PDLIM5	1.00721	1.08656e-28	1.47038e-26	54.5015
1552309_a_at	NEXN	1.62354	1.84718e-28	2.48256e-26	53.9759
212473_s_at	MICAL2	1.53264	1.97087e-28	2.63077e-26	53.9117
209156_s_at	COL6A2	1.94974	2.35393e-28	3.12086e-26	53.7358
212764_at	ZEB1	1.65157	2.64733e-28	3.48631e-26	53.6195
218854_at	DSE	1.20158	7.31667e-28	9.50779e-26	52.6125
231148_at	IGFL2	1.26556	9.50016e-28	1.2264e-25	52.3539
225496_s_at	SYTL2	1.60572	1.09132e-27	1.3996e-25	52.2166
208131_s_at	PTGIS	2.11243	1.24938e-27	1.59191e-25	52.0826
202465_at	PCOLCE	1.50739	2.08732e-27	2.62547e-25	51.5743
214081_at	PLXDC1	1.08632	3.21227e-27	4.01473e-25	51.1473
202007_at	NID1	1.63099	3.31047e-27	4.1021e-25	51.1175
214927_at	ITGBL1	1.79828	3.78898e-27	4.64671e-25	50.9838
212354_at	SULF1	2.50978	5.04019e-27	6.14277e-25	50.7012
219602_s_at	FAM38B	1.48973	5.67183e-27	6.86991e-25	50.5843
1554474_a_at	MOXD1	1.78878	8.42209e-27	1.01385e-24	50.1928
231341_at	SLC35D3	1.34597	8.8819e-27	1.06269e-24	50.1402
219779_at	ZFHX4	1.29889	9.27577e-27	1.10309e-24	50.0972
231579_s_at	TIMP2	1.25022	9.33697e-27	1.10367e-24	50.0907
204894_s_at	AOC3	1.40455	9.50603e-27	1.11693e-24	50.0729
203562_at	FEZ1	1.08902	1.01437e-26	1.18476e-24	50.0086
213428_s_at	COL6A1	1.54924	1.20014e-26	1.39344e-24	49.8421
209360_s_at	RUNX1	1.52401	1.96207e-26	2.22541e-24	49.3553
226612_at	FLJ25076	1.51769	2.17843e-26	2.45662e-24	49.2517
217525_at	OLFML1	1.39814	2.48834e-26	2.79007e-24	49.12
232231_at	RUNX2	2.07463	2.7153e-26	3.02725e-24	49.0336
205547_s_at	TAGLN	1.84875	4.30074e-26	4.74096e-24	48.5782
206481_s_at	LDB2	1.24949	4.33784e-26	4.75514e-24	48.5697
226751_at	CNRIP1	1.22219	4.46606e-26	4.8685e-24	48.5409
224724_at	SULF2	1.66451	4.61958e-26	5.00803e-24	48.5074
205433_at	BCHE	2.00157	4.75124e-26	5.12246e-24	48.4796
202363_at	SPOCK1	1.96403	5.60394e-26	6.00877e-24	48.3161
217892_s_at	LIMA1	1.02194	5.87287e-26	6.26291e-24	48.2697
203868_s_at	VCAM1	2.15277	8.23567e-26	8.73515e-24	47.9349
226769_at	FIBIN	1.88209	1.16881e-25	1.23304e-23	47.5883
201289_at	CYR61	1.67881	1.24247e-25	1.30373e-23	47.5278
214696_at	C17orf91	1.3355	1.38464e-25	1.44518e-23	47.4205
223235_s_at	SMOC2	1.87356	1.47858e-25	1.53507e-23	47.3555
203603_s_at	ZEB2	1.47777	1.9243e-25	1.97689e-23	47.0947
203903_s_at	HEPH	1.93561	2.10559e-25	2.15187e-23	47.0055
204472_at	GEM	1.65479	2.16998e-25	2.20619e-23	46.9757
213652_at	PCSK5	1.30815	3.56163e-25	3.58391e-23	46.4851
221900_at	COL8A2	1.78626	3.88719e-25	3.8718e-23	46.3985
227727_at	MRGPRF	1.06397	4.42528e-25	4.38549e-23	46.2702
205226_at	PDGFRL	1.58684	4.45569e-25	4.39345e-23	46.2634
204337_at	RGS4	1.82371	9.26802e-25	9.04762e-23	45.5384
219165_at	PDLIM2	1.10165	1.02939e-24	9.99932e-23	45.4345
209047_at	AQP1	1.3707	1.3319e-24	1.2811e-22	45.1794
202628_s_at	SERPINE1	1.85967	1.34902e-24	1.29124e-22	45.1668
201506_at	TGFBI	1.40459	1.41696e-24	1.34969e-22	45.1181
205428_s_at	CALB2	1.29346	1.46826e-24	1.3918e-22	45.0829
201505_at	LAMB1	1.64977	1.4913e-24	1.40684e-22	45.0675
204135_at	FILIP1L	1.64119	2.19868e-24	2.03503e-22	44.6833
202237_at	NNMT	2.59399	2.98543e-24	2.75024e-22	44.3805
211980_at	COL4A1	1.16364	3.26328e-24	2.99215e-22	44.2924
201893_x_at	DCN	2.07142	3.71552e-24	3.39097e-22	44.164
228608_at	NALCN	1.10506	4.41452e-24	3.99178e-22	43.9933
210946_at	PPAP2A	1.0134	4.48848e-24	4.04004e-22	43.9769
209732_at	CLEC2B	1.57903	6.09786e-24	5.43874e-22	43.6736
221773_at	ELK3	1.05004	6.61637e-24	5.8745e-22	43.5928
223204_at	C4orf18	1.51862	8.31485e-24	7.31632e-22	43.3667
202878_s_at	CD93	1.14369	1.00514e-23	8.80485e-22	43.179
227058_at	C13orf33	1.08426	1.28115e-23	1.11234e-21	42.9389
210986_s_at	TPM1	1.06292	1.2997e-23	1.12346e-21	42.9247
219523_s_at	ODZ3	1.31211	1.37953e-23	1.18724e-21	42.8657
202436_s_at	CYP1B1	2.0049	1.57815e-23	1.35224e-21	42.7325
201508_at	IGFBP4	1.36233	1.79625e-23	1.53244e-21	42.6044
204939_s_at	PLN	1.64032	2.23385e-23	1.89751e-21	42.3887
226875_at	DOCK11	1.49796	3.25791e-23	2.74363e-21	42.0153
227059_at	GPC6	1.63273	3.89295e-23	3.26442e-21	41.8391
209596_at	MXRA5	1.53625	4.36084e-23	3.64121e-21	41.7267
232090_at	LOC100128178	1.68802	5.46396e-23	4.52379e-21	41.5036
205529_s_at	RUNX1T1	1.57777	5.51295e-23	4.54518e-21	41.4948
203980_at	FABP4	3.61046	5.62631e-23	4.61922e-21	41.4746
226372_at	CHST11	1.12356	6.23866e-23	5.10063e-21	41.3724
1554195_a_at	C5orf46	1.15923	7.13471e-23	5.78501e-21	41.2396
210762_s_at	DLC1	1.29066	7.55466e-23	6.10031e-21	41.183
224794_s_at	CERCAM	1.02254	8.11053e-23	6.49571e-21	41.1128
207191_s_at	ISLR	1.67229	1.15895e-22	9.24427e-21	40.7596
227295_at	IKIP	1.08864	1.16589e-22	9.26195e-21	40.7537
221935_s_at	C3orf64	1.1667	1.17786e-22	9.31938e-21	40.7436
205666_at	FMO1	1.6831	1.65895e-22	1.30731e-20	40.4048
201185_at	HTRA1	1.29877	2.0743e-22	1.61515e-20	40.1837
219134_at	ELTD1	1.0926	2.26702e-22	1.75824e-20	40.0959
236044_at	PPAPDC1A	1.78558	3.18636e-22	2.46153e-20	39.7591
213010_at	PRKCDBP	1.11724	3.40674e-22	2.62145e-20	39.6929
209101_at	CTGF	1.71199	3.75375e-22	2.86599e-20	39.597
204035_at	SCG2	1.6662	3.85244e-22	2.92994e-20	39.5713
224952_at	TANC2	1.02162	4.84093e-22	3.65342e-20	39.3454
221942_s_at	GUCY1A3	1.6047	7.9793e-22	5.97595e-20	38.8511
205066_s_at	ENPP1	1.34511	1.01004e-21	7.53573e-20	38.6179
203305_at	F13A1	1.47271	1.15546e-21	8.58806e-20	38.4849
1556499_s_at	COL1A1	1.01227	1.3861e-21	1.02635e-19	38.3049
203766_s_at	LMOD1	1.08851	1.66579e-21	1.2288e-19	38.1231
213943_at	TWIST1	1.6562	1.73181e-21	1.27272e-19	38.0847
206488_s_at	CD36	1.99654	3.25305e-21	2.3554e-19	37.4612
209348_s_at	MAF	1.22058	3.96512e-21	2.84995e-19	37.2655
235296_at	EIF5A2	1.05591	4.06247e-21	2.90926e-19	37.2415
201280_s_at	DAB2	1.26906	5.36651e-21	3.81528e-19	36.9662
201963_at	ACSL1	1.3336	7.14629e-21	5.04405e-19	36.683
209191_at	TUBB6	1.13708	7.31206e-21	5.14255e-19	36.6604
209687_at	CXCL12	1.90182	8.70563e-21	6.03611e-19	36.4879
218559_s_at	MAFB	1.2436	9.40381e-21	6.49724e-19	36.4116
204682_at	LTBP2	1.19854	1.02642e-20	7.04208e-19	36.3251
201645_at	TNC	1.88058	1.08395e-20	7.41091e-19	36.2711
230372_at	HAS2	1.12096	1.29756e-20	8.80996e-19	36.0933
219304_s_at	PDGFD	1.4885	1.4282e-20	9.66351e-19	35.9985
225688_s_at	PHLDB2	1.69151	1.59141e-20	1.07308e-18	35.8915
227705_at	TCEAL7	1.30811	1.75064e-20	1.17025e-18	35.7972
202664_at	WIPF1	1.28477	1.75341e-20	1.17025e-18	35.7957
227376_at	GLI3	1.2121	1.95915e-20	1.30313e-18	35.686
203951_at	CNN1	1.15496	2.02909e-20	1.34509e-18	35.6513
205624_at	CPA3	1.1562	2.87425e-20	1.87371e-18	35.3071
204222_s_at	GLIPR1	1.20169	2.9494e-20	1.91633e-18	35.2816
201667_at	GJA1	1.57824	3.44711e-20	2.23232e-18	35.1275
226905_at	FAM101B	1.18676	3.52639e-20	2.26869e-18	35.105
207574_s_at	GADD45B	1.30065	3.97732e-20	2.55042e-18	34.986
204017_at	KDELR3	1.25881	4.11029e-20	2.6271e-18	34.9535
218729_at	LXN	1.22245	4.40584e-20	2.80686e-18	34.8849
205518_s_at	CMAH	1.55673	4.5034e-20	2.85973e-18	34.8632
204083_s_at	TPM2	1.17489	5.29348e-20	3.3506e-18	34.7035
209612_s_at	ADH1B	2.72905	5.58672e-20	3.52484e-18	34.6502
204254_s_at	VDR	1.24228	6.36054e-20	3.98743e-18	34.522
203185_at	RASSF2	1.098	9.38439e-20	5.82723e-18	34.1376
235944_at	HMCN1	1.46892	1.1842e-19	7.30705e-18	33.9077
208370_s_at	RCAN1	1.17734	1.35072e-19	8.30844e-18	33.7777
203498_at	RCAN2	1.19284	1.61969e-19	9.90079e-18	33.5983
219479_at	KDELC1	1.03318	1.85636e-19	1.12772e-17	33.4635
201842_s_at	EFEMP1	2.0068	2.29991e-19	1.36341e-17	33.2518
209496_at	RARRES2	1.41394	2.34702e-19	1.38715e-17	33.2318
228937_at	C13orf31	1.19276	2.51485e-19	1.48187e-17	33.1635
210133_at	CCL11	1.45025	3.84372e-19	2.24469e-17	32.7444
209758_s_at	MFAP5	2.40276	4.49223e-19	2.60788e-17	32.5904
226609_at	DCBLD1	1.04973	5.07061e-19	2.92634e-17	32.4707
201215_at	PLS3	1.21836	5.47797e-19	3.15216e-17	32.3944
203131_at	PDGFRA	1.88348	5.68155e-19	3.25975e-17	32.3583
203789_s_at	SEMA3C	1.49363	6.11919e-19	3.50061e-17	32.285
219410_at	TMEM45A	1.47879	6.58533e-19	3.75632e-17	32.2125
207826_s_at	ID3	1.18777	8.46976e-19	4.762e-17	31.9639
221760_at	MAN1A1	1.49956	8.95324e-19	5.01944e-17	31.9091
201939_at	PLK2	1.351	1.19268e-18	6.66745e-17	31.6258
203886_s_at	FBLN2	1.06334	1.2334e-18	6.87551e-17	31.5927
205880_at	PRKD1	1.20283	1.29166e-18	7.17985e-17	31.5471
228109_at	RASGRF2	1.03881	1.40629e-18	7.77301e-17	31.4631
224964_s_at	GNG2	1.20542	1.43312e-18	7.87697e-17	31.4444
204284_at	PPP1R3C	1.13083	1.61819e-18	8.84462e-17	31.3245
205501_at	PDE10A	1.14524	2.53507e-18	1.36283e-16	30.8812
212950_at	GPR116	1.0301	3.51575e-18	1.86954e-16	30.5582
203477_at	COL15A1	1.38766	3.56026e-18	1.88809e-16	30.5458
226722_at	FAM20C	1.06674	3.97018e-18	2.08297e-16	30.4382
213869_x_at	THY1	1.20568	5.19668e-18	2.6976e-16	30.1724
206326_at	GRP	1.06204	5.44692e-18	2.80524e-16	30.126
212670_at	ELN	1.12104	5.50161e-18	2.82598e-16	30.1161
203865_s_at	ADARB1	1.00802	5.97243e-18	3.05982e-16	30.035
213241_at	PLXNC1	1.17544	6.23849e-18	3.1878e-16	29.992
231202_at	ALDH1L2	1.13289	9.56763e-18	4.85106e-16	29.5698
214770_at	MSR1	1.24176	1.10738e-17	5.60026e-16	29.4255
204036_at	LPAR1	1.09734	1.21313e-17	6.08797e-16	29.3355
205943_at	TDO2	2.09585	1.51706e-17	7.59381e-16	29.1148
201141_at	GPNMB	1.41664	1.57352e-17	7.85641e-16	29.0787
212915_at	PDZRN3	1.34178	2.4924e-17	1.23812e-15	28.6248
226065_at	PRICKLE1	1.26116	3.05649e-17	1.50312e-15	28.4234
204774_at	EVI2A	1.46237	3.65667e-17	1.7893e-15	28.2465
203549_s_at	LPL	1.34827	3.75891e-17	1.83021e-15	28.2193
227971_at	NRK	1.35046	4.94627e-17	2.37881e-15	27.9485
226099_at	ELL2	1.546	6.27478e-17	3.01036e-15	27.7137
208982_at	PECAM1	1.03143	6.33017e-17	3.02953e-15	27.7051
209869_at	ADRA2A	1.43924	7.13934e-17	3.37562e-15	27.5864
207426_s_at	TNFSF4	1.29074	9.12488e-17	4.24285e-15	27.3443
216044_x_at	FAM69A	1.15616	1.43337e-16	6.61778e-15	26.8988
212813_at	JAM3	1.06177	1.92093e-16	8.80667e-15	26.61
227561_at	DDR2	1.15176	1.93411e-16	8.84642e-15	26.6033
202620_s_at	PLOD2	1.23364	2.6678e-16	1.20895e-14	26.2861
204141_at	TUBB2A	1.21046	3.31421e-16	1.49154e-14	26.0722
204457_s_at	GAS1	1.53118	3.88286e-16	1.73948e-14	25.916
209541_at	IGF1	1.70687	3.96431e-16	1.77193e-14	25.8956
202391_at	BASP1	1.29919	4.03228e-16	1.79797e-14	25.8788
219213_at	JAM2	1.01601	4.145e-16	1.84012e-14	25.8516
228776_at	GJC1	1.25763	4.18294e-16	1.85277e-14	25.8426
213422_s_at	MXRA8	1.03142	5.04137e-16	2.22296e-14	25.6586
235371_at	GLT8D4	1.40189	5.06357e-16	2.22356e-14	25.6543
212713_at	MFAP4	1.30537	5.35849e-16	2.34174e-14	25.5985
203060_s_at	PAPSS2	1.28601	6.78043e-16	2.93699e-14	25.3664
202458_at	PRSS23	1.11272	7.02992e-16	3.03167e-14	25.3308
205206_at	KAL1	1.42731	7.94507e-16	3.41134e-14	25.2102
227856_at	C4orf32	1.10696	1.06591e-15	4.48826e-14	24.9205
201170_s_at	BHLHE40	1.03323	1.39869e-15	5.83939e-14	24.6527
205381_at	LRRC17	1.38829	1.76602e-15	7.3573e-14	24.4229
208747_s_at	C1S	1.32858	2.39896e-15	9.9309e-14	24.1211
228057_at	DDIT4L	1.46332	2.6712e-15	1.09883e-13	24.0152
205959_at	MMP13	1.35027	3.06538e-15	1.25572e-13	23.8796
212067_s_at	C1R	1.13714	3.30467e-15	1.34811e-13	23.8055
207996_s_at	C18orf1	1.0513	5.01257e-15	2.0155e-13	23.3951
224823_at	MYLK	1.00648	5.49726e-15	2.19242e-13	23.3042
220088_at	C5AR1	1.03821	6.83506e-15	2.69854e-13	23.0896
213624_at	SMPDL3A	1.07869	7.84812e-15	3.08609e-13	22.9535
228821_at	ST6GAL2	1.58399	9.06747e-15	3.53722e-13	22.8113
213800_at	CFH	1.35631	1.28531e-14	4.96463e-13	22.4677
205249_at	EGR2	1.22012	1.46662e-14	5.64274e-13	22.3378
207175_at	ADIPOQ	1.59282	1.72561e-14	6.61328e-13	22.1777
218723_s_at	C13orf15	1.03573	1.77871e-14	6.80348e-13	22.1479
212624_s_at	CHN1	1.03747	2.17246e-14	8.2773e-13	21.951
227099_s_at	LOC387763	1.47438	2.24604e-14	8.52453e-13	21.9182
227209_at	CNTN1	1.27518	2.87007e-14	1.07886e-12	21.6769
204780_s_at	FAS	1.05015	3.07042e-14	1.15196e-12	21.6105
212012_at	PXDN	1.09065	3.28132e-14	1.2264e-12	21.5451
211675_s_at	MDFIC	1.0282	6.26451e-14	2.30191e-12	20.9088
205382_s_at	CFD	1.01191	7.56313e-14	2.76357e-12	20.7235
229947_at	PI15	1.03907	8.45666e-14	3.0729e-12	20.6136
211597_s_at	HOPX	1.41935	8.64916e-14	3.13704e-12	20.5915
212158_at	SDC2	1.16175	9.43528e-14	3.41585e-12	20.5059
203476_at	TPBG	1.10964	1.0844e-13	3.88286e-12	20.369
203561_at	FCGR2A	1.1229	1.3294e-13	4.72563e-12	20.1687
204787_at	VSIG4	1.03693	1.68086e-13	5.93199e-12	19.938
226804_at	FAM20A	1.33944	1.93118e-13	6.76673e-12	19.8015
201431_s_at	DPYSL3	1.17799	1.94315e-13	6.79652e-12	19.7954
220532_s_at	TMEM176B	1.2005	2.66396e-13	9.17056e-12	19.4852
209656_s_at	TMEM47	1.32208	2.67297e-13	9.18548e-12	19.4819
206584_at	LY96	1.27706	2.77e-13	9.49379e-12	19.4468
225202_at	RHOBTB3	1.2124	2.89338e-13	9.89093e-12	19.404
226621_at	FGG	1.03305	3.62386e-13	1.21759e-11	19.1827
235521_at	HOXA3	1.66578	4.91367e-13	1.63694e-11	18.8835
202388_at	RGS2	1.28063	5.22948e-13	1.7304e-11	18.8222
205498_at	GHR	1.17567	7.22629e-13	2.34371e-11	18.5045
225710_at	GNB4	1.10848	8.44015e-13	2.72389e-11	18.3519
227038_at	SGMS2	1.02013	9.29948e-13	2.98161e-11	18.2567
201042_at	TGM2	1.18729	1.00716e-12	3.18748e-11	18.1783
202157_s_at	CUGBP2	1.01931	1.12989e-12	3.553e-11	18.0654
210004_at	OLR1	1.14159	1.54931e-12	4.81783e-11	17.7553
212942_s_at	KIAA1199	1.22432	1.76378e-12	5.45022e-11	17.628
223343_at	MS4A7	1.1503	2.0404e-12	6.27536e-11	17.4849
226677_at	ZNF521	1.52481	2.10299e-12	6.45774e-11	17.4553
208396_s_at	PDE1A	1.14111	2.19348e-12	6.72507e-11	17.4139
205798_at	IL7R	1.18073	2.27859e-12	6.96235e-11	17.3765
219197_s_at	SCUBE2	1.11431	2.36061e-12	7.15917e-11	17.3418
213568_at	OSR2	1.23056	2.51719e-12	7.5988e-11	17.2788
223620_at	GPR34	1.18233	2.57095e-12	7.74919e-11	17.258
1558828_s_at	LOC728264	1.03302	2.75643e-12	8.2828e-11	17.1896
201041_s_at	DUSP1	1.15202	3.8466e-12	1.13843e-10	16.8625
213258_at	TFPI	1.10444	4.44001e-12	1.30422e-10	16.7217
202499_s_at	SLC2A3	1.31423	5.6098e-12	1.63559e-10	16.4923
230867_at	COL6A6	1.19416	5.67384e-12	1.65181e-10	16.4811
238447_at	RBMS3	1.1644	5.88861e-12	1.70926e-10	16.4447
215049_x_at	CD163	1.10195	1.14764e-11	3.25418e-10	15.7902
238478_at	BNC2	1.18091	1.35955e-11	3.811e-10	15.624
219607_s_at	MS4A4A	1.30708	2.58321e-11	7.08919e-10	14.9948
214511_x_at	FCGR1B	1.09841	2.74022e-11	7.48866e-10	14.937
203417_at	MFAP2	1.35333	3.17028e-11	8.61597e-10	14.7942
204959_at	MNDA	1.2177	4.66675e-11	1.24248e-09	14.4154
209598_at	PNMA2	1.32629	5.0134e-11	1.32578e-09	14.3452
226435_at	PAPLN	1.11973	5.89913e-11	1.53621e-09	14.1859
213844_at	HOXA5	1.49536	8.2605e-11	2.10503e-09	13.8562
209897_s_at	SLIT2	1.07269	9.12106e-11	2.30636e-09	13.7592
204646_at	DPYD	1.22616	1.26708e-10	3.14716e-09	13.4375
204719_at	ABCA8	1.334	1.73891e-10	4.25978e-09	13.1278
228335_at	CLDN11	1.28501	2.04211e-10	4.95306e-09	12.9706
230422_at	FPR3	1.05202	2.81062e-10	6.69295e-09	12.6582
219529_at	CLIC3	1.00283	2.82573e-10	6.72079e-09	12.653
222722_at	OGN	1.43952	3.23283e-10	7.63353e-09	12.5214
227266_s_at	FYB	1.19187	4.62817e-10	1.05967e-08	12.1707
201860_s_at	PLAT	1.27091	5.07367e-10	1.15897e-08	12.0808
202803_s_at	ITGB2	1.02615	5.82936e-10	1.31872e-08	11.9452
212977_at	CXCR7	1.09982	6.8849e-10	1.54572e-08	11.7826
210889_s_at	FCGR2B	1.08147	7.81512e-10	1.73864e-08	11.6588
212588_at	PTPRC	1.27865	1.0749e-09	2.34352e-08	11.3476
232568_at	MGC24103	1.11401	1.28601e-09	2.76994e-08	11.1725
225803_at	FBXO32	1.06136	1.73098e-09	3.64826e-08	10.8825
211742_s_at	EVI2B	1.10958	2.02475e-09	4.23558e-08	10.7296
225987_at	STEAP4	1.15847	2.06229e-09	4.30951e-08	10.7116
230482_at	ST6GALNAC5	1.16214	2.25767e-09	4.68783e-08	10.6234
209550_at	NDN	1.0251	2.76651e-09	5.63702e-08	10.4251
228640_at	PCDH7	1.18535	3.18717e-09	6.4274e-08	10.2871
220330_s_at	SAMSN1	1.10551	4.34915e-09	8.57679e-08	9.9841
209301_at	CA2	1.03362	4.72773e-09	9.25823e-08	9.90276
236313_at	CDKN2B	1.05202	5.10039e-09	9.92855e-08	9.82883
204359_at	FLRT2	1.13782	5.15183e-09	1.00187e-07	9.81906
216834_at	RGS1	1.19632	8.36619e-09	1.57092e-07	9.34682
206666_at	GZMK	1.05879	1.57834e-08	2.8387e-07	8.72909
217767_at	C3	1.29374	4.5615e-08	7.48375e-07	7.69772
226535_at	ITGB6	1.35684	4.83654e-08	7.91515e-07	7.64088
204446_s_at	ALOX5	1.06585	7.72267e-08	1.22104e-06	7.18677
202037_s_at	SFRP1	1.28004	8.58095e-08	1.34378e-06	7.08456
219778_at	ZFPM2	1.06665	1.12094e-07	1.72375e-06	6.82551
211726_s_at	FMO2	1.08994	1.30576e-07	1.98003e-06	6.67761
212992_at	AHNAK2	1.08124	1.35921e-07	2.05157e-06	6.63874
219773_at	NOX4	1.19362	3.63031e-07	4.95024e-06	5.68795
222549_at	CLDN1	1.0142	4.93397e-07	6.54151e-06	5.39144
225911_at	NPNT	1.0012	5.82604e-07	7.58583e-06	5.23093
209189_at	FOS	1.0767	8.00335e-07	1.00862e-05	4.92446
204268_at	S100A2	1.03656	5.36701e-06	5.22897e-05	3.09362
215121_x_at	IGL@	1.52654	5.61196e-06	5.42186e-05	3.05082
218963_s_at	KRT23	1.0821	7.73592e-06	7.14999e-05	2.74321
224646_x_at	H19	1.54162	1.59899e-05	0.000132834	2.04879
214669_x_at	IGKC	1.33292	1.74223e-05	0.000142739	1.96687
228186_s_at	RSPO3	1.0691	1.75472e-05	0.000143523	1.96005
204475_at	MMP1	1.0829	3.79246e-05	0.000275206	1.22569
206392_s_at	RARRES1	1.09203	5.03776e-05	0.000347455	0.955852
206002_at	GPR64	1.03003	0.000126899	0.000744333	0.0809178
217378_x_at	LOC100130100	1.07693	0.000298433	0.00150266	-0.724179
216401_x_at	LOC652493	1.02898	0.000484963	0.00222387	-1.17887
212592_at	IGJ	1.12654	0.000683161	0.00294874	-1.49855
219873_at	COLEC11	-1.54895	2.03682e-13	7.09885e-12	19.7491
203824_at	TSPAN8	-2.01879	6.65958e-11	1.72394e-09	14.0672
220816_at	LPAR3	-1.03379	1.39604e-09	2.98726e-08	11.0924
209242_at	PEG3	-1.28821	9.83373e-06	8.75487e-05	2.5135
209560_s_at	DLK1	-1.35812	1.6365e-05	0.000135377	2.02664

## Sheet: C2 signature genes
ID	geneSymbol	logFC	P.Value	adj.P.Val	B
204116_at	IL2RG	1.31803	9.02011e-18	1.76993e-13	29.6562
235175_at	GBP4	1.25745	3.21036e-17	3.14969e-13	28.4321
205692_s_at	CD38	1.39453	6.72294e-17	4.39725e-13	27.7195
210152_at	LILRB4	1.08919	1.45847e-16	7.1545e-13	26.9728
1555759_a_at	CCL5	1.46012	4.86611e-16	1.90966e-12	25.8114
219716_at	APOL6	1.01235	1.24463e-15	3.48888e-12	24.9063
206513_at	AIM2	1.06937	9.28664e-15	1.71521e-11	22.9699
213915_at	NKG7	1.1838	1.04462e-14	1.71521e-11	22.8566
206715_at	TFEC	1.51564	1.04895e-14	1.71521e-11	22.8526
229625_at	GBP5	1.42169	1.91861e-14	2.89593e-11	22.271
222838_at	SLAMF7	1.7604	2.26223e-14	2.92544e-11	22.1123
204118_at	CD48	1.2858	3.2721e-14	3.56695e-11	21.7569
205831_at	CD2	1.54801	3.99856e-14	3.92298e-11	21.5638
205242_at	CXCL13	2.20806	4.71341e-14	4.40412e-11	21.4055
205306_x_at	KMO	1.08161	5.55056e-14	4.9506e-11	21.2481
206978_at	CCR2	1.31136	6.05116e-14	4.97189e-11	21.1649
210164_at	GZMB	1.33371	6.08121e-14	4.97189e-11	21.1601
221087_s_at	APOL3	1.03391	6.38763e-14	5.01352e-11	21.1128
202902_s_at	CTSS	1.34529	9.80383e-14	7.11536e-11	20.7004
205488_at	GZMA	1.60347	1.74179e-13	1.17853e-10	20.1472
209670_at	TRAC	1.05541	4.471e-13	2.6766e-10	19.2401
211122_s_at	CXCL11	2.24006	4.61567e-13	2.6766e-10	19.2094
204533_at	CXCL10	2.04256	8.62928e-13	4.70344e-10	18.6075
201422_at	IFI30	1.14169	1.00465e-12	5.1877e-10	18.4613
226818_at	MPEG1	1.35626	1.32583e-12	6.50385e-10	18.1945
203915_at	CXCL9	2.20999	1.4439e-12	6.74575e-10	18.1125
204232_at	FCER1G	1.24217	1.52292e-12	6.94949e-10	18.0612
213975_s_at	LYZ	1.67569	2.0488e-12	8.93369e-10	17.776
205270_s_at	LCP2	1.1751	3.91555e-12	1.44964e-09	17.1534
202307_s_at	TAP1	1.18088	5.88678e-12	1.92517e-09	16.7616
210895_s_at	CD86	1.26686	7.14346e-12	2.29785e-09	16.5757
229560_at	TLR8	1.25392	9.45098e-12	2.9056e-09	16.3067
204192_at	CD37	1.11046	9.72617e-12	2.93611e-09	16.2792
203416_at	CD53	1.21708	1.04157e-11	3.09662e-09	16.2134
226219_at	ARHGAP30	1.05594	1.15045e-11	3.36926e-09	16.1179
223502_s_at	TNFSF13B	1.435	1.19436e-11	3.44642e-09	16.0819
206134_at	ADAMDEC1	2.01961	1.21229e-11	3.44748e-09	16.0676
1552701_a_at	CARD16	1.02143	1.68394e-11	4.5892e-09	15.7519
204205_at	APOBEC3G	1.13538	1.94067e-11	5.07672e-09	15.6157
218232_at	C1QA	1.23404	1.96632e-11	5.07672e-09	15.6031
204891_s_at	LCK	1.10149	2.07744e-11	5.29397e-09	15.5503
204279_at	PSMB9	1.38377	2.1861e-11	5.41488e-09	15.5013
211366_x_at	CASP1	1.03742	2.21188e-11	5.41488e-09	15.4901
214038_at	CCL8	1.54154	2.87681e-11	6.48837e-09	15.2377
220330_s_at	SAMSN1	1.427	2.9777e-11	6.53675e-09	15.2046
203923_s_at	CYBB	1.20633	2.99821e-11	6.53675e-09	15.1981
204122_at	TYROBP	1.10566	4.64011e-11	9.79013e-09	14.7789
209606_at	CYTIP	1.30416	6.41883e-11	1.27222e-08	14.4675
205159_at	CSF2RB	1.27139	7.82501e-11	1.4907e-08	14.2775
205098_at	CCR1	1.04832	8.1136e-11	1.53082e-08	14.2427
212588_at	PTPRC	1.56048	8.36467e-11	1.56316e-08	14.2135
219243_at	GIMAP4	1.0309	9.19613e-11	1.67241e-08	14.1226
204103_at	CCL4	1.0746	9.80844e-11	1.74965e-08	14.0608
213160_at	DOCK2	1.01176	1.04619e-10	1.83289e-08	13.9989
211742_s_at	EVI2B	1.36797	1.07658e-10	1.86943e-08	13.9714
209949_at	NCF2	1.1048	1.14668e-10	1.95654e-08	13.9109
213603_s_at	RAC2	1.01956	1.17106e-10	1.97346e-08	13.8908
232024_at	GIMAP2	1.1717	1.23638e-10	2.05595e-08	13.8387
227266_s_at	FYB	1.41177	1.34575e-10	2.21901e-08	13.7574
229390_at	FAM26F	1.34534	1.42323e-10	2.32721e-08	13.7037
209083_at	CORO1A	1.02243	1.81222e-10	2.77807e-08	13.4721
214777_at	IGKV4-1	2.1548	2.22544e-10	3.19582e-08	13.2752
201859_at	SRGN	1.0299	2.23131e-10	3.19582e-08	13.2727
230422_at	FPR3	1.21452	2.59948e-10	3.59204e-08	13.1263
204912_at	IL10RA	1.09573	3.00564e-10	4.11449e-08	12.9872
206082_at	HCP5	1.08808	3.10286e-10	4.19892e-08	12.9566
213888_s_at	TRAF3IP3	1.05672	3.12685e-10	4.20241e-08	12.9493
214467_at	GPR65	1.08454	5.49849e-10	7.09812e-08	12.4085
212592_at	IGJ	2.29186	6.38233e-10	8.13209e-08	12.2658
202953_at	C1QB	1.24187	7.04602e-10	8.78466e-08	12.171
218870_at	ARHGAP15	1.04036	7.07357e-10	8.78466e-08	12.1673
219777_at	GIMAP6	1.11556	7.2581e-10	8.90115e-08	12.1427
205758_at	CD8A	1.06509	8.25662e-10	9.87874e-08	12.0192
209374_s_at	IGHM	1.94377	9.59643e-10	1.13434e-07	11.8753
204070_at	RARRES3	1.39106	1.21869e-09	1.39843e-07	11.6466
211798_x_at	IGLJ3	1.7643	1.50394e-09	1.63947e-07	11.4453
214669_x_at	IGKC	2.10507	1.90251e-09	2.01434e-07	11.2204
214511_x_at	FCGR1B	1.15187	1.92995e-09	2.01434e-07	11.2067
217378_x_at	LOC100130100	1.99689	2.35842e-09	2.41026e-07	11.015
204661_at	CD52	1.12135	2.62424e-09	2.60065e-07	10.9128
201721_s_at	LAPTM5	1.05451	3.46355e-09	3.2674e-07	10.6475
231577_s_at	GBP1	1.05522	4.31156e-09	3.99388e-07	10.4382
205267_at	POU2AF1	1.53604	5.37521e-09	4.81609e-07	10.2275
214973_x_at	IGHD	1.58453	6.26467e-09	5.41522e-07	10.0812
210029_at	IDO1	1.50754	6.74999e-09	5.80913e-07	10.01
216401_x_at	LOC652493	1.91763	7.44323e-09	6.25635e-07	9.91661
225353_s_at	C1QC	1.1023	1.0873e-08	8.51233e-07	9.55477
202748_at	GBP2	1.10929	1.42087e-08	1.06413e-06	9.29943
206666_at	GZMK	1.22358	1.4309e-08	1.06757e-06	9.29272
217480_x_at	IGKV1OR15-118	1.38144	1.47212e-08	1.09003e-06	9.26562
208894_at	HLA-DRA	1.14143	1.52125e-08	1.11797e-06	9.2343
213566_at	RNASE6	1.03944	1.56033e-08	1.13395e-06	9.2101
227265_at	FGL2	1.18639	1.62558e-08	1.17702e-06	9.17101
201137_s_at	HLA-DPB1	1.10092	1.82047e-08	1.28033e-06	9.06301
209924_at	CCL18	1.11597	1.84744e-08	1.29466e-06	9.04898
206641_at	TNFRSF17	1.21864	1.91567e-08	1.33295e-06	9.01439
215049_x_at	CD163	1.0685	1.93906e-08	1.33973e-06	9.00281
205681_at	BCL2A1	1.1339	2.13946e-08	1.44263e-06	8.90903
202957_at	HCLS1	1.00528	2.78731e-08	1.81101e-06	8.65683
203936_s_at	MMP9	1.25201	2.89705e-08	1.8638e-06	8.62002
215121_x_at	IGL@	2.11194	3.55198e-08	2.21965e-06	8.42579
223484_at	C15orf48	1.38033	4.47485e-08	2.70171e-06	8.20576
225502_at	DOCK8	1.05555	4.6036e-08	2.76244e-06	8.17874
204959_at	MNDA	1.17871	5.24402e-08	3.07159e-06	8.0547
209619_at	CD74	1.02986	5.46338e-08	3.18108e-06	8.01568
208306_x_at	HLA-DRB4	1.01805	5.63385e-08	3.27063e-06	7.98643
217478_s_at	HLA-DMA	1.03844	7.4522e-08	4.21404e-06	7.72017
226811_at	FAM46C	1.02476	7.8293e-08	4.36439e-06	7.67319
215946_x_at	IGLL3	1.39974	8.04826e-08	4.46665e-06	7.64695
206584_at	LY96	1.11084	8.18776e-08	4.51293e-06	7.6306
202803_s_at	ITGB2	1.03083	9.29914e-08	5.08267e-06	7.5095
219607_s_at	MS4A4A	1.20714	1.58695e-07	8.30375e-06	7.00133
205798_at	IL7R	1.03444	1.97271e-07	1.00542e-05	6.79459
211654_x_at	HLA-DQB1	1.13962	2.41798e-07	1.21035e-05	6.6013
205992_s_at	IL15	1.07088	3.07402e-07	1.47118e-05	6.37343
210889_s_at	FCGR2B	1.04277	3.88777e-07	1.79919e-05	6.15061
211990_at	HLA-DPA1	1.10625	6.41469e-07	2.79089e-05	5.67591
204774_at	EVI2A	1.01644	1.46987e-06	5.62219e-05	4.89118
204646_at	DPYD	1.07387	1.70184e-06	6.33652e-05	4.75268
210538_s_at	BIRC3	1.02948	2.33258e-06	8.35216e-05	4.45489
220994_s_at	STXBP6	1.11607	4.83414e-06	0.00015474	3.76767
211429_s_at	SERPINA1	1.102	5.26373e-06	0.000165256	3.68748
216615_s_at	HTR3A	1.12356	6.94349e-06	0.000206432	3.4268
225165_at	PPP1R1B	1.0285	1.09711e-05	0.000301083	2.99682
205328_at	CLDN10	1.31627	1.7791e-05	0.000451027	2.54326
219768_at	VTCN1	1.33737	2.45939e-05	0.00059578	2.23999
209395_at	CHI3L1	1.11913	2.6611e-05	0.000634459	2.16623
205975_s_at	HOXD1	1.24976	4.81132e-05	0.00103413	1.61295
228601_at	LOC401022	1.06311	8.7331e-05	0.00168001	1.05774
226960_at	CXCL17	1.07163	0.000148216	0.00257143	0.566757
204580_at	MMP12	1.22306	0.000185381	0.00304143	0.359591
204846_at	CP	1.01459	0.000229607	0.00362749	0.161797
1553589_a_at	PDZK1IP1	1.00419	0.000312743	0.00460064	-0.123312
208383_s_at	PCK1	1.09566	0.000595982	0.00754962	-0.715902
212531_at	LCN2	1.01989	0.000838533	0.00982897	-1.02825
204400_at	EFS	-1.31099	3.306e-10	4.41294e-08	12.8959
228821_at	ST6GAL2	-1.36936	1.7749e-08	1.2573e-06	9.08719
226677_at	ZNF521	-1.40297	4.01742e-08	2.48675e-06	8.30848
212158_at	SDC2	-1.01455	4.12894e-08	2.54773e-06	8.28239
204914_s_at	SOX11	-1.85694	6.6252e-08	3.79008e-06	7.83212
230493_at	SHISA2	-1.28133	1.42613e-07	7.53978e-06	7.10287
203417_at	MFAP2	-1.24638	1.95016e-07	9.96513e-06	6.80551
214761_at	ZNF423	-1.11696	2.7739e-07	1.36074e-05	6.47093
202363_at	SPOCK1	-1.13365	1.66855e-06	6.22441e-05	4.77134
223475_at	CRISPLD1	-1.08196	8.33356e-06	0.000244061	3.25519
209598_at	PNMA2	-1.06153	8.85494e-06	0.000254395	3.19814
205347_s_at	TMSB15A	-1.19507	2.47182e-05	0.000598051	2.23527
238877_at	EYA4	-1.34364	3.68471e-05	0.000830695	1.86198
206002_at	GPR64	-1.16292	0.000175568	0.00293942	0.409917
214023_x_at	TUBB2B	-1.15626	0.000215953	0.00344226	0.218444
209758_s_at	MFAP5	-1.21668	0.000273058	0.00414702	0.00180442
205713_s_at	COMP	-1.15755	0.00037348	0.00526846	-0.286748
203184_at	FBN2	-1.02058	0.00086927	0.0100615	-1.06111
208025_s_at	HMGA2	-1.11229	0.000899735	0.0103002	-1.09255
37892_at	COL11A1	-1.38642	0.00215193	0.0196854	-1.88421

## Sheet: C4 signature genes 
ID	geneSymbol	logFC	P.Value	adj.P.Val	B
206799_at	SCGB1D2	1.61316	2.73697e-07	6.53343e-06	6.35586
219873_at	COLEC11	1.27579	8.27962e-07	1.66971e-05	5.29657
202489_s_at	FXYD3	1.07113	1.12883e-06	2.17605e-05	5.00048
225645_at	EHF	1.14566	1.16036e-06	2.21701e-05	4.97417
211657_at	CEACAM6	1.10676	1.51495e-06	2.75243e-05	4.71968
203824_at	TSPAN8	1.77638	2.2634e-06	3.79919e-05	4.33685
205473_at	ATP6V1B1	1.11366	2.42305e-06	4.01902e-05	4.27191
203571_s_at	C10orf116	1.28805	4.15117e-06	6.13361e-05	3.75943
227194_at	FAM3B	1.15706	5.46627e-06	7.62325e-05	3.49782
215729_s_at	VGLL1	1.3553	1.27239e-05	0.000152144	2.69629
210096_at	CYP4B1	1.49372	1.50821e-05	0.000174186	2.53531
218692_at	GOLSYN	1.03422	2.88475e-05	0.00029344	1.92241
240304_s_at	TMC5	1.16008	3.83842e-05	0.000366687	1.65306
212531_at	LCN2	1.25736	5.82437e-05	0.000509295	1.26054
1553589_a_at	PDZK1IP1	1.11173	0.000103224	0.000806731	0.723357
226960_at	CXCL17	1.07333	0.000228443	0.00149967	-0.01908
228195_at	C2orf88	1.08315	0.000667328	0.00347514	-1.01374
209242_at	PEG3	1.18074	0.00072155	0.00369667	-1.08585
205979_at	SCGB2A1	1.10598	0.00151818	0.00665693	-1.76939
229290_at	DAPL1	1.08414	0.00166021	0.00715417	-1.85116
201669_s_at	MARCKS	-1.26581	2.06913e-28	4.06005e-24	53.688
200665_s_at	SPARC	-1.70342	5.85051e-26	4.75139e-22	48.1781
215076_s_at	COL3A1	-2.05471	7.26438e-26	4.75139e-22	47.9668
204620_s_at	VCAN	-2.85372	1.02664e-25	5.0362e-22	47.6291
201069_at	MMP2	-2.26395	8.04901e-24	3.15875e-20	43.3701
210139_s_at	PMP22	-1.65331	3.06408e-23	8.73758e-20	42.0647
202766_s_at	FBN1	-2.33574	3.11706e-23	8.73758e-20	42.048
226695_at	PRRX1	-2.84227	4.85792e-23	1.08188e-19	41.6147
225681_at	CTHRC1	-2.6649	4.96226e-23	1.08188e-19	41.594
226905_at	FAM101B	-1.48954	6.1303e-23	1.12417e-19	41.3875
221729_at	COL5A2	-2.61589	6.30204e-23	1.12417e-19	41.3606
227295_at	IKIP	-1.297	7.57205e-23	1.23816e-19	41.1813
201426_s_at	VIM	-1.08949	8.75981e-23	1.32219e-19	41.039
202450_s_at	CTSK	-2.56995	9.67973e-23	1.35668e-19	40.9415
213139_at	SNAI2	-2.24669	2.98522e-22	3.90507e-19	39.8418
208782_at	FSTL1	-1.41493	5.92011e-22	7.26027e-19	39.1732
201792_at	AEBP1	-2.14172	8.39163e-22	9.68591e-19	38.8326
1556499_s_at	COL1A1	-1.19739	2.10547e-21	2.18806e-18	37.9344
225242_s_at	CCDC80	-2.64721	2.26473e-21	2.18806e-18	37.8632
209955_s_at	FAP	-2.91992	2.28161e-21	2.18806e-18	37.856
216442_x_at	FN1	-2.14944	2.34173e-21	2.18806e-18	37.8306
213125_at	OLFML2B	-1.91972	3.31095e-21	2.95306e-18	37.4924
202283_at	SERPINF1	-2.27127	3.52612e-21	3.00824e-18	37.4309
218162_at	OLFML3	-1.7649	3.87832e-21	3.17085e-18	37.338
221447_s_at	GLT8D2	-1.67335	6.31337e-21	4.82705e-18	36.8622
212488_at	COL5A1	-2.49183	6.39604e-21	4.82705e-18	36.8495
210809_s_at	POSTN	-4.18104	9.42204e-21	6.60283e-18	36.4713
202273_at	PDGFRB	-1.29222	1.90485e-20	1.28886e-17	35.7841
201744_s_at	LUM	-2.76965	3.27424e-20	2.14157e-17	35.2553
204589_at	NUAK1	-1.90333	9.15816e-20	5.72173e-17	34.2512
225524_at	ANTXR2	-1.61894	1.94918e-19	1.12491e-16	33.514
37892_at	COL11A1	-3.86823	2.10908e-19	1.18241e-16	33.437
202391_at	BASP1	-1.67578	2.64488e-19	1.42846e-16	33.2161
221911_at	ETV1	-2.01821	2.69355e-19	1.42846e-16	33.1983
203083_at	THBS2	-2.88015	3.10654e-19	1.60412e-16	33.059
212764_at	ZEB1	-1.66471	3.26004e-19	1.64022e-16	33.012
202465_at	PCOLCE	-1.5366	3.78575e-19	1.8571e-16	32.866
213001_at	ANGPTL2	-1.44025	3.95787e-19	1.89418e-16	32.8226
213905_x_at	BGN	-1.62655	4.1709e-19	1.9486e-16	32.7715
201307_at	2011-09-01	-1.06332	4.42496e-19	2.01922e-16	32.7138
218656_s_at	LHFP	-1.63116	6.53885e-19	2.91603e-16	32.3327
203989_x_at	F2R	-1.11439	7.55907e-19	3.29609e-16	32.1912
218854_at	DSE	-1.20425	1.03505e-18	4.41517e-16	31.8845
226372_at	CHST11	-1.21934	1.08819e-18	4.54308e-16	31.8356
225202_at	RHOBTB3	-1.68854	1.45318e-18	5.94046e-16	31.5534
223122_s_at	SFRP2	-4.0592	1.50565e-18	6.02938e-16	31.5187
208131_s_at	PTGIS	-2.10626	2.29894e-18	9.02195e-16	31.1058
221541_at	CRISPLD2	-2.20157	2.54788e-18	9.80283e-16	31.0055
202664_at	WIPF1	-1.45002	2.70315e-18	1.02002e-15	30.9477
201505_at	LAMB1	-1.72198	2.84295e-18	1.05254e-15	30.8985
224694_at	ANTXR1	-1.63014	2.9195e-18	1.06086e-15	30.8726
202403_s_at	COL1A2	-1.6252	8.33387e-18	2.95429e-15	29.8492
203498_at	RCAN2	-1.35311	1.18656e-17	4.08467e-15	29.5046
207426_s_at	TNFSF4	-1.5683	1.26311e-17	4.27322e-15	29.4436
212423_at	ZCCHC24	-1.31624	1.33579e-17	4.44251e-15	29.389
215446_s_at	LOX	-2.61	1.94995e-17	6.37698e-15	29.02
227846_at	GPR176	-1.02817	2.15586e-17	6.9348e-15	28.9221
209118_s_at	TUBA1A	-1.23812	3.14659e-17	9.80039e-15	28.5533
203603_s_at	ZEB2	-1.47555	3.932e-17	1.20553e-14	28.336
211964_at	COL4A2	-1.18404	4.17004e-17	1.25884e-14	28.2786
234994_at	TMEM200A	-1.76544	4.49632e-17	1.33677e-14	28.2052
202007_at	NID1	-1.57744	5.84459e-17	1.70287e-14	27.9494
201564_s_at	FSCN1	-1.11113	5.9013e-17	1.70287e-14	27.94
228776_at	GJC1	-1.5278	6.49204e-17	1.84618e-14	27.8469
200974_at	ACTA2	-1.79519	9.52984e-17	2.67135e-14	27.4726
221942_s_at	GUCY1A3	-1.68786	1.12756e-16	3.11619e-14	27.3086
201508_at	IGFBP4	-1.38834	1.17783e-16	3.20992e-14	27.2661
211980_at	COL4A1	-1.16998	1.22113e-16	3.28234e-14	27.2309
212624_s_at	CHN1	-1.31953	1.2625e-16	3.34766e-14	27.1984
225464_at	FRMD6	-1.49339	1.28858e-16	3.37126e-14	27.1785
202994_s_at	FBLN1	-1.57298	1.70512e-16	4.28947e-14	26.9054
231579_s_at	TIMP2	-1.20127	1.74364e-16	4.33084e-14	26.8836
200897_s_at	PALLD	-1.34785	2.19644e-16	5.38732e-14	26.6585
222101_s_at	DCHS1	-1.08587	2.63295e-16	6.33796e-14	26.4818
210511_s_at	INHBA	-2.41137	2.6523e-16	6.33796e-14	26.4747
206025_s_at	TNFAIP6	-1.73793	2.68092e-16	6.33796e-14	26.4642
213258_at	TFPI	-1.51127	3.84082e-16	8.97198e-14	26.1137
202998_s_at	LOXL2	-1.58457	4.43509e-16	1.01192e-13	25.9735
204955_at	SRPX	-1.72663	4.66814e-16	1.05285e-13	25.9236
225782_at	MSRB3	-1.6822	5.79237e-16	1.29157e-13	25.7132
221898_at	PDPN	-1.49647	5.86513e-16	1.2931e-13	25.7011
204472_at	GEM	-1.59855	6.18184e-16	1.34778e-13	25.6498
219087_at	ASPN	-2.66347	8.76663e-16	1.89032e-13	25.3093
203570_at	LOXL1	-1.53792	9.13758e-16	1.94889e-13	25.269
219179_at	DACT1	-1.46692	9.58643e-16	2.02263e-13	25.2222
227566_at	NTM	-2.49391	1.24756e-15	2.60421e-13	24.9655
213943_at	TWIST1	-1.69579	1.5819e-15	3.26738e-13	24.7341
218469_at	GREM1	-2.52132	1.68159e-15	3.43711e-13	24.6746
203477_at	COL15A1	-1.52753	1.8589e-15	3.64753e-13	24.5769
204464_s_at	EDNRA	-1.83625	1.93394e-15	3.7572e-13	24.5384
203903_s_at	HEPH	-1.83431	2.59458e-15	4.94281e-13	24.252
204141_at	TUBB2A	-1.3986	2.63949e-15	4.98001e-13	24.2353
225045_at	CCDC88A	-1.02155	5.00737e-15	9.35759e-13	23.6115
227399_at	VGLL3	-1.60096	5.37287e-15	9.94589e-13	23.5429
201438_at	COL6A3	-1.91419	6.44854e-15	1.16406e-12	23.3652
218638_s_at	SPON2	-1.18296	6.46634e-15	1.16406e-12	23.3625
226997_at	ADAMTS12	-1.72198	7.37142e-15	1.31493e-12	23.2349
202363_at	SPOCK1	-1.81623	7.8548e-15	1.38853e-12	23.173
1552309_a_at	NEXN	-1.4466	8.19053e-15	1.43495e-12	23.1323
205100_at	GFPT2	-1.21652	8.55607e-15	1.4727e-12	23.0897
217763_s_at	RAB31	-1.31602	8.77561e-15	1.48444e-12	23.0651
209897_s_at	SLIT2	-1.49174	9.52141e-15	1.59683e-12	22.9856
204897_at	PTGER4	-1.33908	1.09239e-14	1.81651e-12	22.8518
1554474_a_at	MOXD1	-1.62448	1.15412e-14	1.90304e-12	22.7983
207173_x_at	CDH11	-2.07861	1.19196e-14	1.94905e-12	22.7669
209365_s_at	ECM1	-1.20512	1.21245e-14	1.96617e-12	22.7503
201109_s_at	THBS1	-1.86933	1.45866e-14	2.32698e-12	22.5703
209621_s_at	PDLIM3	-1.55215	1.53587e-14	2.43039e-12	22.52
213241_at	PLXNC1	-1.26383	1.56715e-14	2.44417e-12	22.5004
228367_at	ALPK2	-1.45948	1.56949e-14	2.44417e-12	22.499
227300_at	TMEM119	-1.13838	1.81091e-14	2.79793e-12	22.3596
220918_at	C21orf96	-1.17243	1.87167e-14	2.84952e-12	22.3275
235182_at	ISM1	-1.88087	1.87335e-14	2.84952e-12	22.3266
219134_at	ELTD1	-1.05743	2.5481e-14	3.8167e-12	22.0272
209687_at	CXCL12	-1.88843	3.86793e-14	5.46018e-12	21.6209
207191_s_at	ISLR	-1.59872	4.00816e-14	5.61772e-12	21.5862
205880_at	PRKD1	-1.25302	4.20258e-14	5.84845e-12	21.5401
204222_s_at	GLIPR1	-1.20511	4.26381e-14	5.89186e-12	21.526
204114_at	NID2	-1.59576	5.12478e-14	6.93507e-12	21.347
209156_s_at	COL6A2	-1.69052	5.79929e-14	7.79409e-12	21.2267
204135_at	FILIP1L	-1.50623	7.70409e-14	1.00496e-11	20.9503
204163_at	EMILIN1	-1.21367	7.73358e-14	1.00496e-11	20.9466
222895_s_at	BCL11B	-1.27673	8.26519e-14	1.06697e-11	20.8819
204051_s_at	SFRP4	-2.34371	8.49433e-14	1.08938e-11	20.8553
203729_at	EMP3	-1.05994	8.58016e-14	1.09325e-11	20.8455
205941_s_at	COL10A1	-2.10065	9.47614e-14	1.19962e-11	20.7489
216044_x_at	FAM69A	-1.25002	1.22652e-13	1.52321e-11	20.4978
209651_at	TGFB1I1	-1.47857	1.68875e-13	2.08407e-11	20.1867
221019_s_at	COLEC12	-1.61336	2.07838e-13	2.53304e-11	19.9848
212813_at	JAM3	-1.1416	2.18511e-13	2.64668e-11	19.9361
226814_at	ADAMTS9	-1.45928	2.43263e-13	2.92841e-11	19.8317
203417_at	MFAP2	-1.74791	2.95691e-13	3.53783e-11	19.6419
206481_s_at	LDB2	-1.08944	3.37363e-13	4.01197e-11	19.5137
209447_at	SYNE1	-1.01219	3.39511e-13	4.01318e-11	19.5075
205547_s_at	TAGLN	-1.60967	3.66427e-13	4.3054e-11	19.4333
201289_at	CYR61	-1.46854	4.29336e-13	5.01455e-11	19.2793
226751_at	CNRIP1	-1.05811	5.24681e-13	5.98563e-11	19.0843
226771_at	ATP8B2	-1.03941	5.41391e-13	6.14056e-11	19.0538
205226_at	PDGFRL	-1.39354	5.82645e-13	6.57049e-11	18.9824
201893_x_at	DCN	-1.84016	7.40205e-13	8.25244e-11	18.7498
205943_at	TDO2	-2.14068	7.88473e-13	8.6918e-11	18.6883
226875_at	DOCK11	-1.34766	9.42754e-13	1.02771e-10	18.5147
201150_s_at	TIMP3	-1.9521	1.04228e-12	1.12564e-10	18.4171
224002_s_at	FKBP7	-1.07247	1.04407e-12	1.12564e-10	18.4154
228396_at	PRKG1	-1.14541	1.09756e-12	1.17045e-10	18.3669
203381_s_at	APOE	-1.17958	1.11582e-12	1.18349e-10	18.3509
211071_s_at	MLLT11	-1.34571	1.15321e-12	1.21657e-10	18.3188
222885_at	EMCN	-1.05086	1.33492e-12	1.39329e-10	18.1766
205518_s_at	CMAH	-1.48242	1.35115e-12	1.40277e-10	18.1649
204337_at	RGS4	-1.58561	1.4288e-12	1.46785e-10	18.1106
230836_at	ST8SIA4	-1.18387	1.93461e-12	1.9491e-10	17.8161
224772_at	NAV1	-1.00711	2.09861e-12	2.10096e-10	17.7371
209047_at	AQP1	-1.18648	2.1382e-12	2.12974e-10	17.7189
202952_s_at	ADAM12	-1.51697	2.38175e-12	2.34847e-10	17.6141
214696_at	C17orf91	-1.1327	2.70935e-12	2.64492e-10	17.4889
208982_at	PECAM1	-1.04655	2.99757e-12	2.90488e-10	17.3907
224964_s_at	GNG2	-1.172	3.00525e-12	2.90488e-10	17.3883
213247_at	SVEP1	-1.26404	3.53614e-12	3.40128e-10	17.2303
203131_at	PDGFRA	-1.80458	3.96536e-12	3.79552e-10	17.119
206796_at	WISP1	-1.0859	4.67107e-12	4.42398e-10	16.96
205479_s_at	PLAU	-1.52073	4.73337e-12	4.42398e-10	16.9471
207826_s_at	ID3	-1.1385	4.85848e-12	4.51816e-10	16.9218
217525_at	OLFML1	-1.15514	6.02007e-12	5.46879e-10	16.7136
222484_s_at	CXCL14	-2.38443	6.16066e-12	5.57071e-10	16.6912
210133_at	CCL11	-1.37097	6.61671e-12	5.90787e-10	16.6219
203886_s_at	FBLN2	-1.01742	6.62385e-12	5.90787e-10	16.6208
205330_at	MN1	-1.32948	6.99645e-12	6.1915e-10	16.5677
213933_at	PTGER3	-1.10041	7.00495e-12	6.1915e-10	16.5665
212077_at	CALD1	-1.00224	7.9434e-12	6.98948e-10	16.4445
202202_s_at	LAMA4	-1.32812	7.98691e-12	6.99639e-10	16.4392
203878_s_at	MMP11	-1.80144	8.06353e-12	7.03212e-10	16.4299
214043_at	PTPRD	-1.36904	8.43824e-12	7.30843e-10	16.3858
206439_at	EPYC	-2.89054	8.64672e-12	7.37678e-10	16.3621
204236_at	FLI1	-1.02776	9.33037e-12	7.92556e-10	16.2883
226047_at	MRVI1	-1.12082	9.85958e-12	8.31327e-10	16.2347
204451_at	FZD1	-1.17023	9.87153e-12	8.31327e-10	16.2336
209732_at	CLEC2B	-1.34356	1.01555e-11	8.51584e-10	16.206
215016_x_at	DST	-1.03648	1.04119e-11	8.69374e-10	16.1818
213725_x_at	XYLT1	-1.00472	1.32771e-11	1.09925e-09	15.9459
212713_at	MFAP4	-1.32241	1.35598e-11	1.11794e-09	15.9255
227705_at	TCEAL7	-1.18144	1.498e-11	1.22987e-09	15.8288
219410_at	TMEM45A	-1.38321	1.54916e-11	1.26657e-09	15.7963
225275_at	EDIL3	-1.61703	1.61511e-11	1.30957e-09	15.7558
206101_at	ECM2	-1.43167	1.693e-11	1.36148e-09	15.7101
225496_s_at	SYTL2	-1.2733	1.80335e-11	1.43129e-09	15.6489
213909_at	LRRC15	-1.80725	2.11068e-11	1.65003e-09	15.4962
223204_at	C4orf18	-1.27311	2.47172e-11	1.917e-09	15.343
213652_at	PCSK5	-1.06916	2.75458e-11	2.11962e-09	15.238
202628_s_at	SERPINE1	-1.53333	2.8727e-11	2.19331e-09	15.1972
221900_at	COL8A2	-1.45421	3.45825e-11	2.58999e-09	15.0173
205499_at	SRPX2	-1.20978	4.26494e-11	3.08807e-09	14.8141
226930_at	FNDC1	-1.86708	4.39249e-11	3.16873e-09	14.7855
218404_at	SNX10	-1.07288	4.58305e-11	3.29409e-09	14.7443
204891_s_at	LCK	-1.114	5.21036e-11	3.71773e-09	14.62
206227_at	CILP	-1.56004	5.8008e-11	4.07969e-09	14.5159
205666_at	FMO1	-1.41714	6.46689e-11	4.51578e-09	14.4105
213624_at	SMPDL3A	-1.098	6.52217e-11	4.53823e-09	14.4023
212915_at	PDZRN3	-1.2684	6.6707e-11	4.60889e-09	14.3805
205713_s_at	COMP	-2.10935	7.48061e-11	5.07905e-09	14.2694
219779_at	ZFHX4	-1.01411	7.6752e-11	5.17698e-09	14.2445
206666_at	GZMK	-1.43005	7.67762e-11	5.17698e-09	14.2442
219655_at	C7orf10	-1.27697	7.92676e-11	5.32668e-09	14.2133
213422_s_at	MXRA8	-1.00487	9.08413e-11	6.04234e-09	14.0812
214587_at	COL8A1	-1.31501	9.2926e-11	6.16011e-09	14.0592
213338_at	TMEM158	-1.7105	9.98139e-11	6.57231e-09	13.99
218559_s_at	MAFB	-1.07396	1.03271e-10	6.74379e-09	13.957
209596_at	MXRA5	-1.26699	1.03449e-10	6.74379e-09	13.9553
210220_at	FZD2	-1.2596	1.33678e-10	8.4342e-09	13.707
205159_at	CSF2RB	-1.29302	1.43358e-10	8.98714e-09	13.6393
226099_at	ELL2	-1.45356	1.43999e-10	8.99854e-09	13.635
213428_s_at	COL6A1	-1.18989	1.79156e-10	1.09173e-08	13.4234
214770_at	MSR1	-1.13874	1.79711e-10	1.09173e-08	13.4204
201280_s_at	DAB2	-1.07563	1.94079e-10	1.16459e-08	13.3459
201842_s_at	EFEMP1	-1.76073	2.05557e-10	1.22311e-08	13.2903
220088_at	C5AR1	-1.02921	2.05701e-10	1.22311e-08	13.2896
224724_at	SULF2	-1.28383	2.22818e-10	1.31691e-08	13.2122
209101_at	CTGF	-1.4127	2.28113e-10	1.34415e-08	13.1895
204894_s_at	AOC3	-1.07108	2.31411e-10	1.35951e-08	13.1756
232231_at	RUNX2	-1.59068	2.47899e-10	1.4477e-08	13.109
209348_s_at	MAF	-1.02607	2.48959e-10	1.44957e-08	13.1048
227099_s_at	LOC387763	-1.47988	2.54023e-10	1.47382e-08	13.0853
203180_at	ALDH1A3	-1.57527	2.55389e-10	1.47389e-08	13.0802
202436_s_at	CYP1B1	-1.60748	2.62452e-10	1.4997e-08	13.0537
222449_at	PMEPA1	-1.25814	2.71079e-10	1.54177e-08	13.0224
206488_s_at	CD36	-1.66962	2.90784e-10	1.63959e-08	12.9545
226436_at	RASSF4	-1.03548	3.30911e-10	1.8499e-08	12.8294
205798_at	IL7R	-1.25886	4.74749e-10	2.57335e-08	12.4802
203060_s_at	PAPSS2	-1.21224	4.83904e-10	2.61575e-08	12.4617
229560_at	TLR8	-1.18964	4.92512e-10	2.65496e-08	12.4446
202274_at	ACTG2	-1.42443	5.83693e-10	3.11229e-08	12.2803
201506_at	TGFBI	-1.08284	6.59425e-10	3.48767e-08	12.1623
209496_at	RARRES2	-1.20636	7.10463e-10	3.7475e-08	12.0902
203706_s_at	FZD7	-1.18752	7.28569e-10	3.82245e-08	12.0659
203939_at	NT5E	-1.57648	7.72613e-10	4.02127e-08	12.0092
226435_at	PAPLN	-1.25441	8.17882e-10	4.23443e-08	11.9541
205758_at	CD8A	-1.09196	1.01097e-09	5.09957e-08	11.7492
1552289_a_at	CILP2	-1.05851	1.0312e-09	5.17497e-08	11.73
213496_at	LPPR4	-1.18056	1.09289e-09	5.45667e-08	11.6739
219777_at	GIMAP6	-1.13657	1.1555e-09	5.74005e-08	11.62
219607_s_at	MS4A4A	-1.42752	1.17941e-09	5.84403e-08	11.6002
228186_s_at	RSPO3	-1.75682	1.28544e-09	6.32154e-08	11.517
227561_at	DDR2	-1.04192	1.40714e-09	6.8433e-08	11.4296
204939_s_at	PLN	-1.26812	1.40898e-09	6.8433e-08	11.4284
228071_at	GIMAP7	-1.01266	1.43495e-09	6.95223e-08	11.4107
227856_at	C4orf32	-1.02225	1.47609e-09	7.09897e-08	11.3834
232090_at	LOC100128178	-1.30902	1.6603e-09	7.88826e-08	11.2698
206584_at	LY96	-1.27312	1.77778e-09	8.40161e-08	11.2037
213568_at	OSR2	-1.27356	1.7812e-09	8.40161e-08	11.2019
227059_at	GPC6	-1.25938	1.84836e-09	8.61487e-08	11.1661
211959_at	IGFBP5	-1.23741	1.85761e-09	8.63745e-08	11.1613
221760_at	MAN1A1	-1.26657	1.90631e-09	8.80131e-08	11.1363
226065_at	PRICKLE1	-1.10647	1.98349e-09	9.13616e-08	11.098
225664_at	COL12A1	-1.58281	2.32057e-09	1.05403e-07	10.9464
203305_at	F13A1	-1.15659	2.77379e-09	1.2398e-07	10.7741
205381_at	LRRC17	-1.26944	2.8709e-09	1.28029e-07	10.7409
235944_at	HMCN1	-1.19632	3.57412e-09	1.56195e-07	10.5294
202499_s_at	SLC2A3	-1.3522	3.98806e-09	1.71609e-07	10.4236
204749_at	NAP1L3	-1.12574	4.04726e-09	1.73775e-07	10.4094
211597_s_at	HOPX	-1.34854	5.66986e-09	2.35183e-07	10.0841
204035_at	SCG2	-1.26869	6.35464e-09	2.60859e-07	9.97415
201141_at	GPNMB	-1.19541	6.67494e-09	2.72866e-07	9.92672
213888_s_at	TRAF3IP3	-1.00791	7.22117e-09	2.93971e-07	9.85087
205529_s_at	RUNX1T1	-1.17425	8.19362e-09	3.26779e-07	9.72905
226612_at	FLJ25076	-1.06591	8.39254e-09	3.33357e-07	9.70592
203868_s_at	VCAM1	-1.52254	9.04081e-09	3.55509e-07	9.63419
209606_at	CYTIP	-1.19126	1.0103e-08	3.87191e-07	9.52711
212354_at	SULF1	-1.73433	1.06951e-08	4.08288e-07	9.47222
221933_at	NLGN4X	-1.33278	1.17544e-08	4.42698e-07	9.38121
214511_x_at	FCGR1B	-1.13044	1.22645e-08	4.57517e-07	9.34027
228821_at	ST6GAL2	-1.42075	1.37904e-08	5.07684e-07	9.22729
220532_s_at	TMEM176B	-1.1277	1.64902e-08	5.96031e-07	9.05506
205700_at	HSD17B6	-1.06846	1.71103e-08	6.13782e-07	9.0195
219602_s_at	FAM38B	-1.0154	1.79604e-08	6.39599e-07	8.97281
230422_at	FPR3	-1.12328	1.89332e-08	6.68178e-07	8.92201
207030_s_at	CSRP2	-1.00135	1.90357e-08	6.70591e-07	8.91681
204774_at	EVI2A	-1.20617	2.16159e-08	7.48055e-07	8.79442
203980_at	FABP4	-2.61332	2.23297e-08	7.7004e-07	8.76315
205831_at	CD2	-1.20999	2.53591e-08	8.66892e-07	8.64068
206978_at	CCR2	-1.03059	2.61105e-08	8.89478e-07	8.61258
202149_at	NEDD9	-1.20128	2.65032e-08	8.98179e-07	8.59821
225688_s_at	PHLDB2	-1.27441	3.01507e-08	1.00104e-06	8.47412
205488_at	GZMA	-1.27149	3.373e-08	1.09942e-06	8.36619
204661_at	CD52	-1.07703	3.40123e-08	1.10495e-06	8.35817
220988_s_at	C1QTNF3	-1.13364	3.76061e-08	1.20573e-06	8.26155
219304_s_at	PDGFD	-1.11101	3.99516e-08	1.27055e-06	8.20336
205907_s_at	OMD	-1.22769	4.51376e-08	1.42012e-06	8.08599
230867_at	COL6A6	-1.14489	4.98533e-08	1.54051e-06	7.99044
228665_at	CYYR1	-1.03894	5.26209e-08	1.61081e-06	7.9385
209612_s_at	ADH1B	-2.04269	5.57662e-08	1.6965e-06	7.8827
226051_at	SELM	-1.03796	7.3496e-08	2.1365e-06	7.6174
213975_s_at	LYZ	-1.35226	7.36601e-08	2.13811e-06	7.61526
206638_at	HTR2B	-1.21756	8.36382e-08	2.37546e-06	7.49322
227230_s_at	KIAA1211	-1.11254	8.85112e-08	2.49177e-06	7.43883
215049_x_at	CD163	-1.04702	1.01681e-07	2.82604e-06	7.30563
205249_at	EGR2	-1.0349	1.12019e-07	3.08279e-06	7.21267
242828_at	FIGN	-1.26562	1.13242e-07	3.10774e-06	7.20225
227266_s_at	FYB	-1.21798	1.1677e-07	3.18673e-06	7.1728
201667_at	GJA1	-1.14485	1.30038e-07	3.48104e-06	7.06951
226677_at	ZNF521	-1.3917	1.34687e-07	3.57302e-06	7.0358
214927_at	ITGBL1	-1.14983	1.34748e-07	3.57302e-06	7.03536
230493_at	SHISA2	-1.30557	1.9876e-07	5.05845e-06	6.66252
216401_x_at	LOC652493	-1.78936	2.01488e-07	5.10143e-06	6.64944
225911_at	NPNT	-1.23334	2.02801e-07	5.12804e-06	6.64322
209550_at	NDN	-1.07303	2.08314e-07	5.24716e-06	6.6175
202388_at	RGS2	-1.12392	2.13787e-07	5.3575e-06	6.59264
223278_at	GJB2	-1.74143	2.53402e-07	6.15377e-06	6.42969
223235_s_at	SMOC2	-1.19995	2.66813e-07	6.41788e-06	6.38027
226804_at	FAM20A	-1.14723	2.71475e-07	6.49618e-06	6.36367
205433_at	BCHE	-1.26488	3.1378e-07	7.35602e-06	6.22493
226769_at	FIBIN	-1.18988	3.69891e-07	8.4102e-06	6.06737
209541_at	IGF1	-1.32349	3.77279e-07	8.54845e-06	6.04843
217378_x_at	LOC100130100	-1.75551	4.74913e-07	1.04353e-05	5.82813
228335_at	CLDN11	-1.21275	6.88649e-07	1.4284e-05	5.47268
222838_at	SLAMF7	-1.21458	8.62617e-07	1.7307e-05	5.25739
201645_at	TNC	-1.26189	8.85913e-07	1.77023e-05	5.23193
200953_s_at	CCND2	-1.08836	1.54003e-06	2.79541e-05	4.70401
212588_at	PTPRC	-1.2143	1.5874e-06	2.86551e-05	4.6751
212977_at	CXCR7	-1.03262	1.62156e-06	2.91911e-05	4.6548
204529_s_at	TOX	-1.06018	1.81436e-06	3.20444e-05	4.54765
220330_s_at	SAMSN1	-1.07901	1.91985e-06	3.35751e-05	4.49377
226145_s_at	FRAS1	-1.19989	1.98571e-06	3.45116e-05	4.46161
236044_at	PPAPDC1A	-1.12438	2.03995e-06	3.52048e-05	4.43592
235521_at	HOXA3	-1.34185	2.11856e-06	3.61797e-05	4.39988
209598_at	PNMA2	-1.16265	2.15e-06	3.65258e-05	4.38584
212224_at	ALDH1A1	-1.0659	2.31471e-06	3.86548e-05	4.31549
205242_at	CXCL13	-1.47895	2.42618e-06	4.02082e-05	4.27068
211742_s_at	EVI2B	-1.04988	2.55245e-06	4.17716e-05	4.22235
214669_x_at	IGKC	-1.71702	2.88078e-06	4.5586e-05	4.1071
204959_at	MNDA	-1.0445	3.50623e-06	5.36238e-05	3.92007
217480_x_at	IGKV1OR15-118	-1.17784	3.62346e-06	5.48185e-05	3.88877
209656_s_at	TMEM47	-1.02734	3.95579e-06	5.9027e-05	3.80529
204719_at	ABCA8	-1.16671	4.25603e-06	6.24155e-05	3.73571
213844_at	HOXA5	-1.25915	7.01123e-06	9.36517e-05	3.26141
225381_at	LOC399959	-1.08801	7.42575e-06	9.82523e-05	3.20688
203915_at	CXCL9	-1.47953	8.77554e-06	0.00011284	3.04842
211798_x_at	IGLJ3	-1.36103	8.99442e-06	0.000115352	3.02505
215946_x_at	IGLL3	-1.19261	1.1334e-05	0.000138877	2.80588
204359_at	FLRT2	-1.02407	1.34368e-05	0.000159213	2.64466
219773_at	NOX4	-1.2138	1.54812e-05	0.000177541	2.51059
226884_at	LRRN1	-1.02336	1.68384e-05	0.000190324	2.43108
215121_x_at	IGL@	-1.70881	1.96057e-05	0.000215882	2.28719
209374_s_at	IGHM	-1.4286	1.96335e-05	0.000216068	2.28585
214777_at	IGKV4-1	-1.53038	1.99165e-05	0.000218447	2.27232
222722_at	OGN	-1.17739	2.38103e-05	0.000251321	2.10359
206134_at	ADAMDEC1	-1.33639	2.47477e-05	0.000258848	2.06712
223475_at	CRISPLD1	-1.04759	2.95554e-05	0.000298782	1.89953
209758_s_at	MFAP5	-1.41849	3.51347e-05	0.000342481	1.73644
205471_s_at	DACH1	-1.1978	3.52607e-05	0.000342857	1.73306
207175_at	ADIPOQ	-1.06863	3.55779e-05	0.000345257	1.72462
204914_s_at	SOX11	-1.48175	3.69449e-05	0.000355307	1.68908
227048_at	LAMA1	-1.00966	0.000105464	0.000819896	0.703239
214973_x_at	IGHD	-1.10933	0.00011148	0.000853811	0.651271
203184_at	FBN2	-1.21375	0.000112969	0.000862183	0.638847
203440_at	CDH2	-1.00058	0.000148275	0.00107044	0.38437
205267_at	POU2AF1	-1.03744	0.000184868	0.00126864	0.178321
212592_at	IGJ	-1.43299	0.000266192	0.00169365	-0.161527
236163_at	LIX1	-1.00147	0.000336525	0.00203978	-0.37957
205347_s_at	TMSB15A	-1.05197	0.000339459	0.00204981	-0.387637
238877_at	EYA4	-1.09521	0.00119332	0.00551986	-1.54877
208025_s_at	HMGA2	-1.11024	0.00130735	0.00591898	-1.63247
202237_at	NNMT	-1.06233	0.00158173	0.00688174	-1.80689

## Sheet: C5 signature genes
ID	geneSymbol	logFC	P.Value	adj.P.Val	B
1555112_a_at	C1orf114	1.87054	4.52376e-29	3.69855e-26	55.3603
213492_at	COL2A1	2.16381	5.0906e-29	3.99551e-26	55.244
212850_s_at	LRP4	2.33305	1.3158e-28	8.60624e-26	54.3085
226548_at	SBK1	1.51781	5.96508e-27	2.66015e-24	50.5512
213283_s_at	SALL2	1.47874	3.73806e-26	1.41054e-23	48.7434
239295_at	SRrp35	1.25105	1.5188e-25	4.80674e-23	47.3625
227512_at	MEX3A	1.52692	1.75559e-25	5.30251e-23	47.2197
1553321_a_at	SULT1C4	1.26082	4.9312e-25	1.34389e-22	46.2025
214761_at	ZNF423	2.28211	6.43101e-24	1.37162e-21	43.6732
205347_s_at	TMSB15A	2.93235	1.15945e-23	2.36988e-21	43.0927
236126_at	ACVR2B	1.13244	2.67069e-23	4.89759e-21	42.2711
1569940_at	SLC6A16	1.53995	6.21005e-23	1.03266e-20	41.4401
226473_at	CBX2	1.83931	9.66503e-23	1.51718e-20	41.0046
228906_at	TET1	1.78622	8.93194e-22	1.20043e-19	38.8153
218338_at	PHC1	1.10437	1.84399e-21	2.34954e-19	38.1018
205107_s_at	EFNA4	1.05089	2.26484e-21	2.83257e-19	37.8995
220147_s_at	FAM60A	1.11227	6.04877e-21	6.9817e-19	36.9326
229273_at	SALL1	2.14562	5.66584e-20	5.4766e-18	34.7312
214162_at	LOC284244	1.08885	6.91168e-20	6.55174e-18	34.5356
213197_at	ASTN1	1.62038	1.28826e-19	1.18678e-17	33.9231
228523_at	NANOS1	1.78508	1.35935e-19	1.24641e-17	33.8702
213992_at	COL4A6	1.70124	1.434e-19	1.30874e-17	33.8176
208025_s_at	HMGA2	3.16735	1.45663e-19	1.32324e-17	33.8022
205122_at	TMEFF1	2.16711	1.86616e-19	1.65691e-17	33.5585
227048_at	LAMA1	2.38122	3.2757e-19	2.74683e-17	33.0051
240117_at	FBN3	1.55634	4.29761e-19	3.51365e-17	32.738
221016_s_at	TCF7L1	1.79653	4.47415e-19	3.62776e-17	32.6984
219670_at	BEND5	1.07692	5.02507e-19	4.02456e-17	32.5842
221909_at	RNFT2	1.27852	6.93303e-19	5.37707e-17	32.2677
236421_at	ANKRD45	1.49262	7.71496e-19	5.93658e-17	32.1626
206230_at	LHX1	1.72849	1.86174e-18	1.3631e-16	31.2964
236523_at	LOC285556	1.87986	2.05707e-18	1.48944e-16	31.1983
230290_at	SCUBE3	1.07626	2.99374e-18	2.11306e-16	30.8294
242584_at	FAM161A	1.4888	3.9224e-18	2.74876e-16	30.5637
208147_s_at	CYP2C8	1.25219	3.95524e-18	2.76191e-16	30.5556
219945_at	DDX25	1.26565	4.16222e-18	2.89614e-16	30.5054
219372_at	IFT81	1.09932	4.52888e-18	3.1181e-16	30.4224
226232_at	GDF11	1.04773	8.50615e-18	5.5822e-16	29.8028
235334_at	ST6GALNAC3	1.07336	1.02567e-17	6.64213e-16	29.6189
201310_s_at	C5orf13	1.37849	1.06123e-17	6.84983e-16	29.5854
222640_at	DNMT3A	1.12243	1.28205e-17	8.08889e-16	29.3996
218332_at	BEX1	2.8455	2.13614e-17	1.30986e-15	28.8979
225745_at	LRP6	1.2393	2.82329e-17	1.66863e-15	28.6238
229349_at	LIN28B	2.16109	4.03447e-17	2.32837e-15	28.2731
202016_at	MEST	1.50303	4.55408e-17	2.60525e-15	28.1541
205471_s_at	DACH1	2.51098	5.19084e-17	2.96089e-15	28.0255
226258_at	AMN1	1.11226	1.01362e-16	5.63438e-15	27.3681
204724_s_at	COL9A3	2.10225	1.28765e-16	7.05762e-15	27.133
211700_s_at	TRO	1.30409	1.31301e-16	7.17655e-15	27.1139
210220_at	FZD2	1.70778	3.46148e-16	1.7874e-14	26.1619
219837_s_at	CYTL1	1.53313	3.65974e-16	1.87988e-14	26.1072
209757_s_at	MYCN	1.6919	4.8174e-16	2.44256e-14	25.8374
227019_at	C1orf226	1.21705	5.66162e-16	2.81246e-14	25.6789
229073_at	PRTG	1.01129	7.09114e-16	3.48728e-14	25.4578
205177_at	TNNI1	1.1166	8.43194e-16	4.1055e-14	25.2878
209590_at	BMP7	1.81133	1.11431e-15	5.2942e-14	25.0142
224048_at	USP44	1.21803	1.27671e-15	5.99318e-14	24.8807
220393_at	LGSN	1.97634	1.3645e-15	6.39004e-14	24.8154
218824_at	PNMAL1	1.34695	3.18795e-15	1.41205e-13	23.9827
237116_at	LOC646903	1.04737	5.01636e-15	2.16332e-13	23.5379
211535_s_at	FGFR1	1.25238	6.78405e-15	2.85046e-13	23.2418
235048_at	FAM169A	1.65719	7.78876e-15	3.21074e-13	23.1063
214051_at	TMSB15B	1.38825	9.39469e-15	3.82454e-13	22.9225
221958_s_at	GPR177	1.31851	1.12477e-14	4.5226e-13	22.7459
207705_s_at	NINL	1.0658	1.17956e-14	4.73318e-13	22.6993
206228_at	PAX2	2.44713	1.33075e-14	5.24337e-13	22.581
227822_at	ZNF605	1.02544	1.36183e-14	5.34435e-13	22.5584
228551_at	DENND5B	1.31495	1.52377e-14	5.93243e-13	22.4482
225660_at	SEMA6A	1.53663	1.8033e-14	6.93813e-13	22.2831
226431_at	FAM117B	1.00343	2.31006e-14	8.74496e-13	22.0403
224521_s_at	CCDC77	1.10684	2.67939e-14	1.00526e-12	21.8949
230964_at	FREM2	1.24005	2.77616e-14	1.03958e-12	21.8601
206089_at	NELL1	1.41961	2.96378e-14	1.09727e-12	21.796
205031_at	EFNB3	1.11909	4.03246e-14	1.46799e-12	21.4942
213610_s_at	KLHL23	1.09708	4.92599e-14	1.7768e-12	21.298
204165_at	WASF1	1.27792	6.25104e-14	2.22104e-12	21.0646
218380_at	NLRP1	1.36387	6.31148e-14	2.23545e-12	21.0551
204612_at	PKIA	1.32493	8.00575e-14	2.78526e-12	20.8221
228598_at	DPP10	1.75387	8.70358e-14	2.99617e-12	20.7403
205794_s_at	NOVA1	1.31616	1.31657e-13	4.37859e-12	20.3348
208399_s_at	EDN3	1.26211	1.33681e-13	4.4384e-12	20.3199
227997_at	IL17RD	1.56477	1.71554e-13	5.61977e-12	20.0755
229276_at	IGSF9	1.02972	1.8719e-13	6.07114e-12	19.9901
229302_at	TMEM178	1.90791	1.98378e-13	6.40226e-12	19.9333
227084_at	DTNA	1.46844	4.84565e-13	1.47185e-11	19.0588
239537_at	ST8SIA2	1.27725	5.46972e-13	1.65373e-11	18.9402
214023_x_at	TUBB2B	2.43582	6.35718e-13	1.90444e-11	18.7931
223170_at	TMEM98	1.13308	9.90702e-13	2.87993e-11	18.3589
222803_at	PRTFDC1	1.37248	1.63303e-12	4.61054e-11	17.87
228988_at	ZNF711	1.65629	2.34496e-12	6.43965e-11	17.5161
1568838_at	LOC100132169	1.08998	2.50763e-12	6.834e-11	17.4505
226029_at	VANGL2	1.1906	2.95381e-12	7.91798e-11	17.2904
205902_at	KCNN3	1.18072	3.12505e-12	8.30891e-11	17.2353
204811_s_at	CACNA2D2	1.17932	3.26795e-12	8.65366e-11	17.1916
203295_s_at	ATP1A2	1.13807	5.13995e-12	1.30305e-10	16.7488
243161_x_at	ZFP42	1.14442	5.61127e-12	1.40744e-10	16.6631
229546_at	LOC653602	1.37948	7.9542e-12	1.92061e-10	16.3221
203256_at	CDH3	1.35135	1.09359e-11	2.56374e-10	16.0111
204914_s_at	SOX11	2.55274	2.41878e-11	5.36285e-10	15.2358
202986_at	ARNT2	1.15161	2.43113e-11	5.37809e-10	15.2309
202965_s_at	CAPN6	1.55724	2.69292e-11	5.87115e-10	15.131
244640_at	ZNF850P	1.15075	3.97967e-11	8.46035e-10	14.7498
218847_at	IGF2BP2	1.29755	6.49963e-11	1.30006e-09	14.2712
212651_at	RHOBTB1	1.06036	1.33057e-10	2.52499e-09	13.5725
223524_s_at	TMEM108	1.14732	2.1593e-10	3.94504e-09	13.1006
209220_at	GPC3	1.39468	2.28044e-10	4.13938e-09	13.0474
232282_at	WNK3	1.2381	3.28828e-10	5.79718e-09	12.6909
218974_at	SOBP	1.27673	3.31465e-10	5.83319e-09	12.6831
213920_at	CUX2	1.05739	4.12116e-10	7.07483e-09	12.471
220168_at	CASC1	1.46479	4.1703e-10	7.15294e-09	12.4595
203184_at	FBN2	2.09098	4.87109e-10	8.23971e-09	12.3082
209197_at	SYT11	1.03832	5.37054e-10	9.02233e-09	12.2132
236222_at	C3orf15	1.05435	6.61939e-10	1.08691e-08	12.0097
206556_at	CLUL1	1.02565	7.61864e-10	1.23548e-08	11.8729
223623_at	C2orf40	1.87957	8.76405e-10	1.40727e-08	11.7366
217897_at	FXYD6	1.22067	9.00852e-10	1.44298e-08	11.7098
221004_s_at	ITM2C	1.17106	1.06379e-09	1.67795e-08	11.5481
227481_at	CNKSR3	1.14254	1.09787e-09	1.72477e-08	11.5174
225667_s_at	FAM84A	1.87597	1.38405e-09	2.12005e-08	11.2921
201387_s_at	UCHL1	1.68643	1.98938e-09	2.93501e-08	10.9394
219683_at	FZD3	1.18595	2.3006e-09	3.3613e-08	10.7981
211071_s_at	MLLT11	1.25946	2.55348e-09	3.70047e-08	10.6968
236255_at	PLEKHG4B	1.04011	3.19793e-09	4.55368e-08	10.4782
206706_at	NTF3	1.04009	4.04149e-09	5.63625e-08	10.2508
226303_at	PGM5	1.3171	4.28226e-09	5.94247e-08	10.1946
213110_s_at	COL4A5	1.24071	4.35857e-09	6.03556e-08	10.1774
225482_at	KIF1A	1.23643	4.58103e-09	6.32576e-08	10.1291
222853_at	FLRT3	1.63772	4.69436e-09	6.47769e-08	10.1054
237058_x_at	SLC6A13	1.78015	5.11949e-09	6.99544e-08	10.0212
226611_s_at	CENPV	1.27791	5.81202e-09	7.8454e-08	9.89804
230763_at	SPATA17	1.17651	7.43768e-09	9.76855e-08	9.65869
221245_s_at	FZD5	1.31923	9.20013e-09	1.173e-07	9.45238
204400_at	EFS	1.32458	2.73999e-08	3.14594e-07	8.3947
204773_at	IL11RA	1.02119	4.59237e-08	5.04826e-07	7.89484
206280_at	CDH18	1.26069	6.63113e-08	7.05618e-07	7.53954
229849_at	WIPF3	1.07044	7.43981e-08	7.79829e-07	7.4283
203304_at	BAMBI	1.36881	8.21653e-08	8.5214e-07	7.33232
219873_at	COLEC11	1.49738	1.22608e-07	1.22871e-06	6.94566
211276_at	TCEAL2	1.49528	1.37184e-07	1.36019e-06	6.83721
218888_s_at	NETO2	1.13455	1.60761e-07	1.56938e-06	6.68412
226145_s_at	FRAS1	1.44163	1.6935e-07	1.64018e-06	6.63389
203417_at	MFAP2	1.40345	2.24434e-07	2.1071e-06	6.36221
204855_at	SERPINB5	1.1114	2.61862e-07	2.42829e-06	6.2135
232531_at	EMX2OS	1.18792	3.04904e-07	2.7879e-06	6.06681
203628_at	IGF1R	1.04602	3.06152e-07	2.7954e-06	6.06287
228347_at	SIX1	1.87548	3.53092e-07	3.18693e-06	5.92542
227081_at	DNALI1	1.27216	5.2001e-07	4.49949e-06	5.55264
225540_at	MAP2	1.40943	5.56895e-07	4.78432e-06	5.48669
221950_at	EMX2	1.47095	7.11961e-07	5.93462e-06	5.25036
203895_at	PLCB4	1.03705	7.13705e-07	5.9454e-06	5.24801
205549_at	PCP4	1.71013	8.42781e-07	6.90771e-06	5.08817
242828_at	FIGN	1.29457	8.74117e-07	7.13707e-06	5.05308
238877_at	EYA4	1.79698	8.74134e-07	7.13707e-06	5.05306
225381_at	LOC399959	1.30445	8.87982e-07	7.23587e-06	5.03795
204529_s_at	TOX	1.1836	1.19396e-06	9.37863e-06	4.75348
202149_at	NEDD9	1.16027	1.22535e-06	9.60986e-06	4.72856
206857_s_at	FKBP1B	1.02248	1.26875e-06	9.91454e-06	4.69513
203130_s_at	KIF5C	1.14887	1.37961e-06	1.06704e-05	4.61471
213880_at	LGR5	2.05387	1.57393e-06	1.19843e-05	4.48823
227892_at	PRKAA2	1.1329	1.69526e-06	1.27793e-05	4.41697
223475_at	CRISPLD1	1.30864	1.74771e-06	1.31343e-05	4.38774
204154_at	CDO1	1.02434	1.7647e-06	1.32569e-05	4.37846
214913_at	ADAMTS3	1.09768	1.83265e-06	1.37149e-05	4.34221
216086_at	SV2C	1.31241	1.99336e-06	1.4771e-05	4.2616
213622_at	COL9A2	1.09669	2.49286e-06	1.80565e-05	4.04724
203440_at	CDH2	1.34112	3.01231e-06	2.14313e-05	3.86591
204011_at	SPRY2	1.00369	4.06018e-06	2.78953e-05	3.58016
226814_at	ADAMTS9	1.04441	4.22151e-06	2.88321e-05	3.54288
219764_at	FZD10	1.4343	5.45526e-06	3.61388e-05	3.29772
231077_at	C1orf192	1.30279	7.80009e-06	4.98545e-05	2.9562
206373_at	ZIC1	2.0536	8.72554e-06	5.50523e-05	2.84921
205932_s_at	MSX1	1.24601	1.04456e-05	6.45353e-05	2.6776
231725_at	PCDHB2	1.01452	1.05216e-05	6.49229e-05	2.67069
226884_at	LRRN1	1.11886	1.84262e-05	0.000106403	2.13709
204424_s_at	LMO3	1.42886	1.96249e-05	0.000112317	2.07715
229160_at	MUM1L1	1.13773	2.02996e-05	0.000115822	2.04502
236085_at	CAPSL	1.11051	2.31745e-05	0.000130857	1.91913
200953_s_at	CCND2	1.02767	4.08597e-05	0.000215988	1.38105
212843_at	NCAM1	1.06954	8.14275e-05	0.000398546	0.728924
203889_at	SCG5	1.04878	0.000176002	0.00078507	0.00320934
203824_at	TSPAN8	1.54526	0.000208452	0.000911374	-0.155599
209242_at	PEG3	1.34672	0.000439031	0.00175416	-0.852173
208306_x_at	HLA-DRB4	-2.40411	4.07936e-40	8.00452e-36	80.3991
209619_at	CD74	-2.40322	7.62663e-39	7.48249e-35	77.5184
216231_s_at	B2M	-1.04802	6.07321e-38	3.97228e-34	75.4768
208894_at	HLA-DRA	-2.5288	2.91481e-37	1.42986e-33	73.9332
217995_at	SQRDL	-2.00328	1.11775e-36	4.38651e-33	72.6103
204070_at	RARRES3	-2.82489	4.24275e-35	1.38752e-31	69.0304
211990_at	HLA-DPA1	-2.69498	9.71791e-35	2.72407e-31	68.2144
201721_s_at	LAPTM5	-2.17502	4.2213e-34	1.03538e-30	66.7681
204279_at	PSMB9	-2.53865	8.97852e-34	1.8673e-30	66.025
211366_x_at	CASP1	-1.90263	1.00888e-33	1.8673e-30	65.9102
202748_at	GBP2	-2.36616	1.0468e-33	1.8673e-30	65.8738
201954_at	ARPC1B	-1.47385	1.18372e-32	1.93558e-29	63.4851
222592_s_at	ACSL5	-1.9621	2.91757e-31	4.2491e-28	60.3287
202803_s_at	ITGB2	-2.2605	3.03167e-31	4.2491e-28	60.2909
217362_x_at	HLA-DRB6	-1.73048	4.3517e-31	5.69261e-28	59.9349
217478_s_at	HLA-DMA	-2.24846	8.86329e-31	1.08697e-27	59.2342
201288_at	ARHGDIB	-1.6518	1.10204e-30	1.27201e-27	59.0196
209140_x_at	HLA-B	-1.63324	1.308e-30	1.42586e-27	58.8508
226748_at	LYSMD2	-1.54653	3.33815e-30	3.44743e-27	57.9279
217767_at	C3	-3.15077	4.76602e-30	4.67594e-27	57.5771
204174_at	ALOX5AP	-2.18531	9.98737e-30	9.332e-27	56.8484
203416_at	CD53	-2.09037	1.83961e-29	1.64077e-26	56.2467
203236_s_at	LGALS9	-1.42186	3.15117e-29	2.68836e-26	55.7165
223502_s_at	TNFSF13B	-2.45576	5.3844e-29	4.06357e-26	55.1887
213293_s_at	TRIM22	-2.17856	6.30101e-29	4.5792e-26	55.0338
204446_s_at	ALOX5	-2.59433	8.81711e-29	6.17891e-26	54.7029
202180_s_at	MVP	-1.28325	1.06353e-28	7.19608e-26	54.5182
205786_s_at	ITGAM	-1.75421	1.87432e-28	1.16031e-25	53.96
204646_at	DPYD	-2.51775	1.89226e-28	1.16031e-25	53.9506
209083_at	CORO1A	-1.83291	2.46522e-28	1.46583e-25	53.69
203052_at	C2	-1.8559	4.31897e-28	2.49256e-25	53.1376
221477_s_at	SOD2	-1.5936	5.19151e-28	2.91051e-25	52.9563
204774_at	EVI2A	-2.33248	2.38896e-27	1.28786e-24	51.4527
202659_at	PSMB10	-1.57778	2.42843e-27	1.28786e-24	51.4365
203561_at	FCGR2A	-1.99943	2.86469e-27	1.47923e-24	51.2738
204122_at	TYROBP	-1.89556	3.18979e-27	1.59944e-24	51.1679
201137_s_at	HLA-DPB1	-2.17813	3.26051e-27	1.59944e-24	51.1463
212588_at	PTPRC	-2.70683	3.43552e-27	1.64419e-24	51.0948
225973_at	TAP2	-1.92231	4.22077e-27	1.9719e-24	50.892
205270_s_at	LCP2	-1.91635	4.68038e-27	2.13578e-24	50.7902
204232_at	FCER1G	-1.98837	6.19941e-27	2.70322e-24	50.5133
211742_s_at	EVI2B	-2.3713	8.69957e-27	3.71093e-24	50.1795
209040_s_at	PSMB8	-1.73449	1.06896e-26	4.46279e-24	49.9766
209124_at	MYD88	-1.08965	1.10396e-26	4.5129e-24	49.9448
220330_s_at	SAMSN1	-2.40479	1.13734e-26	4.55446e-24	49.9155
208812_x_at	HLA-C	-1.3497	2.57498e-26	1.01053e-23	49.1106
226621_at	FGG	-1.83923	3.40751e-26	1.31102e-23	48.8346
201865_x_at	NR3C1	-1.60823	4.43797e-26	1.64305e-23	48.5743
230925_at	APBB1IP	-1.75829	4.54634e-26	1.65201e-23	48.5506
213566_at	RNASE6	-2.01075	5.10195e-26	1.82019e-23	48.437
212063_at	CD44	-1.96646	6.14128e-26	2.15186e-23	48.2544
202902_s_at	CTSS	-2.02646	6.49879e-26	2.23718e-23	48.1986
209933_s_at	CD300A	-1.41929	7.86299e-26	2.66013e-23	48.0109
209448_at	HTATIP2	-1.48258	1.3937e-25	4.6351e-23	47.4471
209906_at	C3AR1	-1.6212	1.49256e-25	4.80674e-23	47.3796
221698_s_at	CLEC7A	-1.88501	1.50863e-25	4.80674e-23	47.3691
200905_x_at	HLA-E	-1.31125	1.68256e-25	5.24052e-23	47.2616
227188_at	C21orf63	-2.37838	1.75651e-25	5.30251e-23	47.2192
221087_s_at	APOL3	-1.53623	1.81224e-25	5.38785e-23	47.1885
202531_at	IRF1	-1.50345	2.23228e-25	6.53759e-23	46.9831
213603_s_at	RAC2	-1.72977	2.67989e-25	7.73306e-23	46.8031
203104_at	CSF1R	-1.5705	3.29537e-25	9.37127e-23	46.5995
222876_s_at	ADAP2	-1.21471	3.53031e-25	9.89596e-23	46.5317
228532_at	C1orf162	-1.7246	4.85689e-25	1.34228e-22	46.2174
227038_at	SGMS2	-1.81059	5.14679e-25	1.38343e-22	46.1603
211654_x_at	HLA-DQB1	-2.35895	5.85724e-25	1.55312e-22	46.033
205241_at	SCO2	-1.17872	6.03995e-25	1.58021e-22	46.0027
210895_s_at	CD86	-2.02006	6.42793e-25	1.65959e-22	45.9414
204959_at	MNDA	-2.3193	7.16096e-25	1.82483e-22	45.835
208018_s_at	HCK	-1.63566	8.53999e-25	2.14835e-22	45.6616
226525_at	STK17B	-1.67661	8.68484e-25	2.14895e-22	45.645
201743_at	CD14	-1.87893	8.76139e-25	2.14895e-22	45.6364
221875_x_at	HLA-F	-1.49735	8.9305e-25	2.16339e-22	45.6175
204924_at	TLR2	-1.48133	9.35931e-25	2.23961e-22	45.5713
204533_at	CXCL10	-3.118	1.45826e-24	3.44746e-22	45.1346
202237_at	NNMT	-3.39962	1.49218e-24	3.48566e-22	45.1119
226474_at	NLRC5	-1.74901	1.68422e-24	3.88797e-22	44.9927
209546_s_at	APOL1	-1.7748	1.71788e-24	3.91956e-22	44.9732
235458_at	HAVCR2	-1.55252	1.79478e-24	4.04795e-22	44.9301
204858_s_at	TYMP	-1.46788	2.17447e-24	4.84857e-22	44.7411
227266_s_at	FYB	-2.36447	2.39982e-24	5.29094e-22	44.644
210889_s_at	FCGR2B	-2.16716	3.18999e-24	6.95489e-22	44.3636
211429_s_at	SERPINA1	-2.53473	3.66584e-24	7.90451e-22	44.2267
205859_at	LY86	-1.44497	6.61586e-24	1.3921e-21	43.6452
224414_s_at	CARD6	-1.45808	6.70639e-24	1.3921e-21	43.6319
223303_at	FERMT3	-1.3478	6.73984e-24	1.3921e-21	43.627
204158_s_at	TCIRG1	-1.33022	1.19076e-23	2.40877e-21	43.0665
216834_at	RGS1	-2.51878	1.263e-23	2.52884e-21	43.0085
211528_x_at	HLA-G	-1.20949	1.33491e-23	2.64582e-21	42.9539
227609_at	EPSTI1	-2.08735	1.67923e-23	3.29499e-21	42.728
202307_s_at	TAP1	-1.82989	1.80098e-23	3.4989e-21	42.659
225373_at	C10orf54	-1.08611	1.89471e-23	3.6449e-21	42.6091
218802_at	CCDC109B	-1.59981	1.99961e-23	3.80935e-21	42.556
203281_s_at	UBA7	-1.20883	2.0219e-23	3.81478e-21	42.5451
210644_s_at	LAIR1	-1.48947	2.08098e-23	3.88886e-21	42.5167
211395_x_at	FCGR2C	-1.60767	2.49417e-23	4.61705e-21	42.3384
205992_s_at	IL15	-2.17062	2.83433e-23	5.14955e-21	42.2125
1552701_a_at	CARD16	-1.6072	3.2391e-23	5.83098e-21	42.081
223280_x_at	MS4A6A	-1.83428	3.33013e-23	5.94035e-21	42.0538
204205_at	APOBEC3G	-1.79091	3.36259e-23	5.94422e-21	42.0442
225415_at	DTX3L	-1.2632	3.66242e-23	6.38307e-21	41.9601
215049_x_at	CD163	-1.97836	4.50318e-23	7.74665e-21	41.7566
205101_at	CIITA	-1.29845	4.54013e-23	7.74665e-21	41.7486
203923_s_at	CYBB	-1.91264	5.17871e-23	8.76006e-21	41.619
218870_at	ARHGAP15	-1.76377	6.14078e-23	1.02987e-20	41.4512
221581_s_at	LAT2	-1.29065	6.36919e-23	1.05022e-20	41.4152
226219_at	ARHGAP30	-1.63993	6.64095e-23	1.08591e-20	41.3741
226789_at	EMB	-1.79588	7.95787e-23	1.29049e-20	41.196
224451_x_at	ARHGAP9	-1.53298	8.27567e-23	1.33103e-20	41.1574
213160_at	DOCK2	-1.63879	8.88745e-23	1.4178e-20	41.0872
207375_s_at	IL15RA	-1.36444	9.03447e-23	1.42963e-20	41.071
221666_s_at	PYCARD	-1.43108	1.01914e-22	1.58711e-20	40.9524
214467_at	GPR65	-1.81483	1.48457e-22	2.29371e-20	40.582
219716_at	APOL6	-1.35108	1.57805e-22	2.40035e-20	40.5219
219243_at	GIMAP4	-1.65723	1.60097e-22	2.41649e-20	40.5077
219684_at	RTP4	-2.10849	1.80161e-22	2.69856e-20	40.3915
210754_s_at	LYN	-1.31575	2.02145e-22	3.00491e-20	40.2781
214511_x_at	FCGR1B	-1.97845	2.40801e-22	3.55263e-20	40.1058
210538_s_at	BIRC3	-2.21145	2.64124e-22	3.86765e-20	40.0148
230422_at	FPR3	-1.9884	2.66492e-22	3.87341e-20	40.006
202953_at	C1QB	-2.07842	2.92335e-22	4.2178e-20	39.9149
225353_s_at	C1QC	-1.97671	3.08808e-22	4.39089e-20	39.8609
218232_at	C1QA	-1.911	3.31765e-22	4.68338e-20	39.7903
204923_at	SASH3	-1.34752	3.5223e-22	4.93675e-20	39.7314
216250_s_at	LPXN	-1.20444	4.58865e-22	6.38571e-20	39.471
201859_at	SRGN	-1.66818	6.34285e-22	8.76475e-20	39.1523
229390_at	FAM26F	-2.15668	6.75855e-22	9.27387e-20	39.0898
219725_at	TREM2	-1.27599	6.87753e-22	9.37159e-20	39.0726
218451_at	CDCP1	-1.43605	7.30967e-22	9.89175e-20	39.0127
213733_at	MYO1F	-1.20218	9.38682e-22	1.25298e-19	38.7665
204912_at	IL10RA	-1.78003	9.74725e-22	1.2923e-19	38.7294
208966_x_at	IFI16	-1.51585	1.41283e-21	1.83593e-19	38.364
205098_at	CCR1	-1.64945	1.47176e-21	1.89992e-19	38.3237
209949_at	NCF2	-1.75067	1.51025e-21	1.93687e-19	38.2983
202771_at	FAM38A	-1.48847	2.21716e-21	2.80678e-19	37.9204
228937_at	C13orf31	-1.62584	2.2664e-21	2.83257e-19	37.8988
212646_at	RFTN1	-1.45452	2.34383e-21	2.9108e-19	37.8657
217118_s_at	C22orf9	-1.08168	2.40064e-21	2.9626e-19	37.8421
209515_s_at	RAB27A	-1.22247	2.42055e-21	2.9685e-19	37.834
226603_at	SAMD9L	-1.77138	2.51736e-21	3.06805e-19	37.7954
208829_at	TAPBP	-1.19738	2.99026e-21	3.62191e-19	37.626
225579_at	PQLC3	-1.26446	3.02725e-21	3.64422e-19	37.6139
206219_s_at	VAV1	-1.01739	3.2351e-21	3.84722e-19	37.5485
203473_at	SLCO2B1	-1.3491	3.53241e-21	4.17548e-19	37.462
218109_s_at	MFSD1	-1.01409	4.38322e-21	5.15015e-19	37.2496
204118_at	CD48	-1.74258	5.39327e-21	6.26194e-19	37.0455
200878_at	EPAS1	-1.37377	6.39834e-21	7.342e-19	36.8773
206584_at	LY96	-2.05753	6.81757e-21	7.77757e-19	36.8148
229295_at	LOC150166	-1.00121	7.96207e-21	9.03074e-19	36.6621
212268_at	SERPINB1	-1.34317	9.81098e-21	1.09381e-18	36.4566
201762_s_at	PSME2	-1.00307	1.04018e-20	1.15313e-18	36.3991
211275_s_at	GYG1	-1.09492	1.07913e-20	1.18959e-18	36.3629
203028_s_at	CYBA	-1.38656	1.09987e-20	1.20568e-18	36.3442
219209_at	IFIH1	-1.85504	1.23087e-20	1.34178e-18	36.2334
201422_at	IFI30	-1.62077	1.32678e-20	1.43835e-18	36.1596
203320_at	SH2B3	-1.26551	1.50277e-20	1.62019e-18	36.037
223343_at	MS4A7	-1.90259	1.54276e-20	1.65421e-18	36.0112
203868_s_at	VCAM1	-2.54623	1.61977e-20	1.72735e-18	35.9632
223220_s_at	PARP9	-1.40017	1.7943e-20	1.89289e-18	35.8625
227135_at	NAAA	-1.36983	1.81691e-20	1.90332e-18	35.8502
215313_x_at	HLA-A	-1.1699	1.82359e-20	1.90332e-18	35.8466
232024_at	GIMAP2	-1.81632	2.04337e-20	2.11961e-18	35.7346
203761_at	SLA	-1.49119	2.05242e-20	2.11961e-18	35.7303
210176_at	TLR1	-1.57733	2.07754e-20	2.13432e-18	35.7183
231577_s_at	GBP1	-1.77552	2.46118e-20	2.51527e-18	35.5516
205668_at	LY75	-2.00591	2.52889e-20	2.57109e-18	35.5249
204220_at	GMFG	-1.30994	2.99945e-20	3.03377e-18	35.357
200791_s_at	IQGAP1	-1.01638	3.11019e-20	3.12965e-18	35.3213
205147_x_at	NCF4	-1.06966	3.46617e-20	3.47006e-18	35.2147
1555759_a_at	CCL5	-1.83442	3.63519e-20	3.62079e-18	35.1678
212873_at	HMHA1	-1.08367	3.66047e-20	3.62757e-18	35.161
201141_at	GPNMB	-1.96651	3.89789e-20	3.84344e-18	35.0992
226818_at	MPEG1	-1.91218	4.56362e-20	4.47737e-18	34.944
205831_at	CD2	-2.06215	4.71428e-20	4.60216e-18	34.9121
225803_at	FBXO32	-1.99819	4.83317e-20	4.69487e-18	34.8876
217728_at	S100A6	-1.41335	5.75558e-20	5.53608e-18	34.7157
223620_at	GPR34	-1.93738	6.35442e-20	6.08226e-18	34.6183
209732_at	CLEC2B	-1.89969	7.12421e-20	6.72073e-18	34.5058
223322_at	RASSF5	-1.54687	8.20714e-20	7.70529e-18	34.3666
204588_s_at	SLC7A7	-1.3099	1.02388e-19	9.47673e-18	34.149
202688_at	TNFSF10	-2.0482	1.59055e-19	1.43164e-17	33.7157
203828_s_at	IL32	-1.74462	1.69465e-19	1.51837e-17	33.6534
217967_s_at	FAM129A	-2.03361	1.82327e-19	1.62619e-17	33.5814
223484_at	C15orf48	-2.42955	2.02725e-19	1.79184e-17	33.4771
209310_s_at	CASP4	-1.12501	2.05997e-19	1.80717e-17	33.4613
202864_s_at	SP100	-1.1664	2.06302e-19	1.80717e-17	33.4599
214719_at	SLC46A3	-1.32638	2.08377e-19	1.81723e-17	33.45
201649_at	UBE2L6	-1.06842	2.225e-19	1.9233e-17	33.3855
206271_at	TLR3	-1.39274	2.44905e-19	2.09849e-17	33.2912
238025_at	MLKL	-1.33577	2.49222e-19	2.12619e-17	33.274
202181_at	KIAA0247	-1.01107	2.50642e-19	2.12905e-17	33.2684
225929_s_at	RNF213	-1.25684	2.94062e-19	2.4871e-17	33.1112
205729_at	OSMR	-1.51378	3.24837e-19	2.7356e-17	33.0133
204116_at	IL2RG	-1.54447	3.36783e-19	2.81207e-17	32.9778
228234_at	TICAM2	-1.22823	3.81879e-19	3.1751e-17	32.8542
205988_at	CD84	-1.32347	4.02168e-19	3.32968e-17	32.8033
219332_at	MICALL2	-1.06908	4.12892e-19	3.38986e-17	32.7774
203148_s_at	TRIM14	-1.29558	4.38126e-19	3.56718e-17	32.7191
218627_at	DRAM1	-1.34276	4.85211e-19	3.90197e-17	32.6187
204057_at	IRF8	-1.34395	5.38097e-19	4.29209e-17	32.5169
202411_at	IFI27	-2.05115	5.46354e-19	4.34031e-17	32.502
213416_at	ITGA4	-1.50002	6.3423e-19	5.0057e-17	32.3553
206715_at	TFEC	-1.92796	6.75292e-19	5.30024e-17	32.2936
227001_at	NIPAL2	-1.57768	6.8048e-19	5.31967e-17	32.2861
219777_at	GIMAP6	-1.73786	6.91401e-19	5.37707e-17	32.2704
216598_s_at	CCL2	-1.80068	7.0636e-19	5.45677e-17	32.2494
202644_s_at	TNFAIP3	-1.4799	8.72645e-19	6.66266e-17	32.0415
225502_at	DOCK8	-1.83142	8.96927e-19	6.82151e-17	32.0145
209230_s_at	NUPR1	-1.41982	9.1502e-19	6.93224e-17	31.9948
203845_at	KAT2B	-1.27577	1.06283e-18	8.02108e-17	31.8476
209199_s_at	MEF2C	-1.24429	1.29225e-18	9.67805e-17	31.6554
213693_s_at	MUC1	-1.52229	1.32881e-18	9.91402e-17	31.628
204103_at	CCL4	-1.58691	1.60366e-18	1.19193e-16	31.4431
219079_at	CYB5R4	-1.01529	1.82553e-18	1.34159e-16	31.3157
219385_at	SLAMF8	-1.2433	1.8969e-18	1.38368e-16	31.278
205488_at	GZMA	-2.10472	1.90866e-18	1.3871e-16	31.2719
210592_s_at	SAT1	-1.19689	2.54852e-18	1.82507e-16	30.9877
201601_x_at	IFITM1	-1.51593	2.58766e-18	1.84636e-16	30.9727
202974_at	MPP1	-1.00465	2.74827e-18	1.95386e-16	30.9135
202446_s_at	PLSCR1	-1.26091	2.79506e-18	1.97995e-16	30.8969
221653_x_at	APOL2	-1.02334	4.63243e-18	3.17823e-16	30.4002
210260_s_at	TNFAIP8	-1.36129	5.55057e-18	3.75563e-16	30.2224
203973_s_at	CEBPD	-1.32137	6.17116e-18	4.1443e-16	30.1183
226810_at	OGFRL1	-1.38925	6.80021e-18	4.53509e-16	30.0229
33304_at	ISG20	-1.48377	6.81812e-18	4.53509e-16	30.0203
204192_at	CD37	-1.54114	6.89408e-18	4.57012e-16	30.0094
225171_at	ARHGAP18	-1.0596	7.18016e-18	4.74374e-16	29.9694
202897_at	SIRPA	-1.30706	8.03522e-18	5.29085e-16	29.8588
209879_at	SELPLG	-1.05959	8.75118e-18	5.72386e-16	29.7749
219279_at	DOCK10	-1.32864	9.29535e-18	6.05958e-16	29.7156
203332_s_at	INPP5D	-1.04685	1.09856e-17	7.06754e-16	29.5514
1553589_a_at	PDZK1IP1	-2.52149	1.11485e-17	7.14885e-16	29.537
215051_x_at	AIF1	-1.16667	1.12316e-17	7.17874e-16	29.5297
223405_at	NPL	-1.27455	1.27445e-17	8.06684e-16	29.4055
211122_s_at	CXCL11	-2.92376	1.33714e-17	8.38254e-16	29.3583
203233_at	IL4R	-1.24318	1.38031e-17	8.62561e-16	29.327
225798_at	JAZF1	-1.19011	1.43604e-17	8.9454e-16	29.2881
212531_at	LCN2	-2.74517	1.68353e-17	1.04539e-15	29.1319
209539_at	ARHGEF6	-1.14442	2.03697e-17	1.26087e-15	28.9446
214770_at	MSR1	-1.60718	2.11467e-17	1.30319e-15	28.9078
208949_s_at	LGALS3	-1.29546	2.16118e-17	1.31494e-15	28.8864
219892_at	TM6SF1	-1.22722	2.16401e-17	1.31494e-15	28.8852
204949_at	ICAM3	-1.07746	2.16454e-17	1.31494e-15	28.8849
206991_s_at	CCR5	-1.29497	2.24517e-17	1.35971e-15	28.849
208747_s_at	C1S	-1.83582	2.30513e-17	1.39173e-15	28.8231
204787_at	VSIG4	-1.52475	2.31923e-17	1.39595e-15	28.8171
205798_at	IL7R	-1.81313	2.39702e-17	1.43836e-15	28.7847
229625_at	GBP5	-1.75379	2.46122e-17	1.46791e-15	28.7587
227265_at	FGL2	-1.92477	2.51821e-17	1.49734e-15	28.7362
206171_at	ADORA3	-1.16342	2.53022e-17	1.49994e-15	28.7315
205291_at	IL2RB	-1.28746	2.90863e-17	1.71391e-15	28.5946
205639_at	AOAH	-1.10364	3.06531e-17	1.80082e-15	28.543
223434_at	GBP3	-2.11569	3.46359e-17	2.0227e-15	28.423
204204_at	SLC31A2	-1.35147	3.59682e-17	2.09427e-15	28.3859
205419_at	GPR183	-1.56014	4.00969e-17	2.32089e-15	28.2791
219574_at	2001-03-01	-1.38145	5.22702e-17	2.97289e-15	28.0187
203708_at	PDE4B	-1.67553	5.61532e-17	3.1845e-15	27.9483
218999_at	TMEM140	-1.10905	8.44045e-17	4.71847e-15	27.5479
223454_at	CXCL16	-1.19671	9.32891e-17	5.20034e-15	27.4496
213975_s_at	LYZ	-2.18883	1.09319e-16	6.05947e-15	27.2939
213716_s_at	SECTM1	-1.28283	1.21339e-16	6.68798e-15	27.1914
221840_at	PTPRE	-1.12365	1.47901e-16	7.99478e-15	26.997
227761_at	MYO5A	-1.15166	1.63093e-16	8.79178e-15	26.9009
200862_at	DHCR24	-1.36022	2.1197e-16	1.13024e-14	26.6435
200911_s_at	TACC1	-1.29537	2.17728e-16	1.15689e-14	26.6172
219607_s_at	MS4A4A	-2.04558	2.18624e-16	1.15689e-14	26.6131
229450_at	IFIT3	-1.77739	2.23509e-16	1.17895e-14	26.5914
228617_at	XAF1	-1.56543	2.37475e-16	1.24592e-14	26.5319
223553_s_at	DOK3	-1.12464	2.80193e-16	1.46222e-14	26.3695
223767_at	GPR84	-1.21489	3.73034e-16	1.91114e-14	26.0885
224701_at	PARP14	-1.16551	4.5098e-16	2.29847e-14	25.9022
218963_s_at	KRT23	-2.43255	4.66843e-16	2.37316e-14	25.8682
206082_at	HCP5	-1.54087	5.00942e-16	2.53337e-14	25.799
213539_at	CD3D	-1.12693	5.05139e-16	2.54803e-14	25.7908
210140_at	CST7	-1.10334	5.40937e-16	2.70299e-14	25.7236
201847_at	LIPA	-1.061	5.41369e-16	2.70299e-14	25.7228
219147_s_at	C9orf95	-1.1478	5.60234e-16	2.79008e-14	25.6892
223551_at	PKIB	-1.55322	6.07376e-16	3.00958e-14	25.6099
201963_at	ACSL1	-1.53661	6.48797e-16	3.20673e-14	25.5451
228152_s_at	DDX60L	-1.27252	6.71552e-16	3.31085e-14	25.5113
205379_at	CBR3	-1.13117	7.24208e-16	3.5526e-14	25.4372
213415_at	CLIC2	-1.19301	8.91252e-16	4.30743e-14	25.2334
203665_at	HMOX1	-1.10465	1.02077e-15	4.89718e-14	25.1002
209395_at	CHI3L1	-2.29437	1.02685e-15	4.91437e-14	25.0944
204254_s_at	VDR	-1.45206	1.04427e-15	4.98556e-14	25.0779
203508_at	TNFRSF1B	-1.07341	1.06948e-15	5.09352e-14	25.0545
226099_at	ELL2	-1.94255	1.1965e-15	5.65728e-14	24.9443
217933_s_at	LAP3	-1.11085	1.26575e-15	5.956e-14	24.8891
224840_at	FKBP5	-1.58989	1.42123e-15	6.63987e-14	24.7754
205159_at	CSF2RB	-1.72133	1.59069e-15	7.39634e-14	24.6648
225763_at	RCSD1	-1.29347	1.75026e-15	8.08083e-14	24.571
209606_at	CYTIP	-1.75521	1.82523e-15	8.4072e-14	24.5299
209670_at	TRAC	-1.29515	1.89771e-15	8.70019e-14	24.4917
206060_s_at	PTPN22	-1.01557	2.08099e-15	9.51824e-14	24.4012
202820_at	AHR	-1.04425	2.1263e-15	9.70287e-14	24.38
213142_x_at	PION	-1.25953	2.16893e-15	9.87444e-14	24.3606
203234_at	UPP1	-1.20014	2.38326e-15	1.07012e-13	24.2681
225626_at	PAG1	-1.37749	2.78142e-15	1.24039e-13	24.1165
204236_at	FLI1	-1.27933	3.87496e-15	1.70099e-13	23.7912
228531_at	SAMD9	-1.50694	4.01937e-15	1.75653e-13	23.7553
204908_s_at	BCL3	-1.16177	4.11532e-15	1.79049e-13	23.7321
219593_at	SLC15A3	-1.05757	4.56918e-15	1.98355e-13	23.6295
225033_at	ST3GAL1	-1.57824	4.73777e-15	2.04768e-13	23.594
205119_s_at	FPR1	-1.16731	5.10678e-15	2.19093e-13	23.5204
208436_s_at	IRF7	-1.43262	5.11389e-15	2.19093e-13	23.519
218589_at	LPAR6	-1.40287	5.53334e-15	2.3498e-13	23.4417
226757_at	IFIT2	-1.63992	5.54458e-15	2.3498e-13	23.4397
203041_s_at	LAMP2	-1.02742	6.25268e-15	2.63284e-13	23.3218
218559_s_at	MAFB	-1.3909	7.11106e-15	2.97512e-13	23.1956
218723_s_at	C13orf15	-1.36798	7.22474e-15	3.00985e-13	23.1801
226878_at	HLA-DOA	-1.56915	7.55895e-15	3.13577e-13	23.1357
213915_at	NKG7	-1.34512	7.70091e-15	3.18792e-13	23.1175
225710_at	GNB4	-1.55115	8.85323e-15	3.61281e-13	22.9807
206392_s_at	RARRES1	-2.58534	1.07622e-14	4.34517e-13	22.7892
215121_x_at	IGL@	-3.23774	1.18478e-14	4.74445e-13	22.695
209417_s_at	IFI35	-1.18981	1.22642e-14	4.9012e-13	22.6611
209386_at	TM4SF1	-1.43138	1.285e-14	5.10412e-13	22.6153
235299_at	SLC41A2	-1.13448	1.40745e-14	5.50138e-13	22.5261
210827_s_at	ELF3	-1.1738	1.54364e-14	5.99789e-13	22.4355
204972_at	OAS2	-1.69095	1.64578e-14	6.36951e-13	22.3727
201061_s_at	STOM	-1.08696	1.76468e-14	6.81625e-13	22.3043
212657_s_at	IL1RN	-1.42924	1.82815e-14	7.01995e-13	22.2697
207996_s_at	C18orf1	-1.34346	2.0542e-14	7.8572e-13	22.1554
225645_at	EHF	-1.89933	2.31303e-14	8.74496e-13	22.039
212592_at	IGJ	-3.12076	2.86603e-14	1.07118e-12	21.8289
202869_at	OAS1	-1.59137	2.91486e-14	1.0853e-12	21.8123
205382_s_at	CFD	-1.33822	2.96182e-14	1.09727e-12	21.7966
225102_at	MGLL	-1.1741	3.11121e-14	1.14323e-12	21.7484
203915_at	CXCL9	-2.658	3.21722e-14	1.17997e-12	21.7156
205681_at	BCL2A1	-1.68683	3.36395e-14	1.23148e-12	21.6718
222651_s_at	TRPS1	-1.30749	3.58155e-14	1.30627e-12	21.6104
213624_at	SMPDL3A	-1.37166	4.37299e-14	1.58608e-12	21.4147
235306_at	GIMAP8	-1.19873	5.39486e-14	1.94235e-12	21.2089
209795_at	CD69	-1.76037	5.50804e-14	1.97947e-12	21.1886
204112_s_at	HNMT	-1.20005	5.67858e-14	2.0333e-12	21.1587
209183_s_at	C10orf10	-1.28524	6.25947e-14	2.22104e-12	21.0633
202510_s_at	TNFAIP2	-1.51535	6.59203e-14	2.32642e-12	21.0125
205286_at	TFAP2C	-1.69047	6.61655e-14	2.33088e-12	21.0089
210004_at	OLR1	-1.56562	7.04379e-14	2.46809e-12	20.9476
214669_x_at	IGKC	-2.88986	9.46959e-14	3.23814e-12	20.6576
202957_at	HCLS1	-1.48301	9.65618e-14	3.29519e-12	20.6385
202637_s_at	ICAM1	-1.25029	1.00175e-13	3.40664e-12	20.6025
231769_at	FBXO6	-1.27681	1.09853e-13	3.72287e-12	20.5122
213888_s_at	TRAF3IP3	-1.3858	1.15877e-13	3.8934e-12	20.4599
206295_at	IL18	-1.29533	1.27494e-13	4.26182e-12	20.3663
210152_at	LILRB4	-1.12156	1.29009e-13	4.30512e-12	20.3547
219403_s_at	HPSE	-1.46934	1.39091e-13	4.60243e-12	20.281
226702_at	CMPK2	-1.71967	2.2008e-13	7.07937e-12	19.8316
209348_s_at	MAF	-1.28576	2.27065e-13	7.29208e-12	19.801
208885_at	LCP1	-1.17809	2.36862e-13	7.5943e-12	19.7596
220532_s_at	TMEM176B	-1.56669	2.52014e-13	8.04449e-12	19.6989
213797_at	RSAD2	-1.86218	2.57146e-13	8.19111e-12	19.6792
221563_at	DUSP10	-1.31488	2.59291e-13	8.24606e-12	19.671
203085_s_at	TGFB1	-1.17106	2.63957e-13	8.38084e-12	19.6536
223391_at	SGPP1	-1.05041	2.67824e-13	8.47619e-12	19.6393
205821_at	KLRK1	-1.06974	2.83891e-13	8.95581e-12	19.5823
212185_x_at	MT2A	-1.18698	3.23643e-13	1.00642e-11	19.454
222868_s_at	IL18BP	-1.0027	3.76261e-13	1.15721e-11	19.3065
212067_s_at	C1R	-1.37632	4.6563e-13	1.42314e-11	19.0978
204124_at	SLC34A2	-1.7082	4.74125e-13	1.4452e-11	19.0802
214255_at	ATP10A	-1.00376	5.28548e-13	1.60049e-11	18.9738
226459_at	PIK3AP1	-1.12586	5.95695e-13	1.79e-11	18.8567
219890_at	CLEC5A	-1.3725	6.64041e-13	1.98625e-11	18.7504
201280_s_at	DAB2	-1.3149	7.3103e-13	2.17667e-11	18.6564
229560_at	TLR8	-1.4832	7.8508e-13	2.32001e-11	18.5866
223278_at	GJB2	-2.58031	8.6221e-13	2.53648e-11	18.4949
209696_at	FBP1	-1.11632	8.85237e-13	2.60032e-11	18.4691
239381_at	KLK7	-1.75897	9.9547e-13	2.88951e-11	18.3542
205898_at	CX3CR1	-1.84845	1.15118e-12	3.30725e-11	18.212
201012_at	ANXA1	-1.24281	1.2995e-12	3.7116e-11	18.0935
204780_s_at	FAS	-1.28677	1.46689e-12	4.17756e-11	17.9749
36711_at	MAFF	-1.30829	1.60132e-12	4.53406e-11	17.8892
203603_s_at	ZEB2	-1.39242	1.60799e-12	4.54639e-11	17.8851
212543_at	AIM1	-1.54797	1.76168e-12	4.95238e-11	17.7958
214791_at	SP140L	-1.29983	1.81724e-12	5.09398e-11	17.7654
227856_at	C4orf32	-1.28886	1.85596e-12	5.17295e-11	17.7448
223044_at	SLC40A1	-1.39704	1.92544e-12	5.35901e-11	17.7089
228071_at	GIMAP7	-1.27105	2.30084e-12	6.3498e-11	17.5347
226535_at	ITGB6	-2.224	2.34653e-12	6.43965e-11	17.5154
206420_at	IGSF6	-1.06892	2.56225e-12	6.97316e-11	17.4294
225847_at	NCEH1	-1.17708	2.56722e-12	6.977e-11	17.4275
222446_s_at	BACE2	-1.18239	2.61521e-12	7.09759e-11	17.4094
212192_at	KCTD12	-1.06647	3.03122e-12	8.10334e-11	17.2651
204638_at	ACP5	-1.21788	3.0876e-12	8.23163e-11	17.2471
224833_at	ETS1	-1.04272	3.28842e-12	8.69614e-11	17.1855
226804_at	FAM20A	-1.66435	3.29826e-12	8.70809e-11	17.1825
223218_s_at	NFKBIZ	-1.29203	3.60053e-12	9.43252e-11	17.0968
202068_s_at	LDLR	-1.39492	3.72045e-12	9.70781e-11	17.0648
204846_at	CP	-2.0807	3.75477e-12	9.78433e-11	17.0558
202086_at	MX1	-1.71669	3.83136e-12	9.95748e-11	17.0361
230875_s_at	ATP11A	-1.38513	3.95825e-12	1.02601e-10	17.0042
206978_at	CCR2	-1.38263	4.17212e-12	1.07718e-10	16.9528
214038_at	CCL8	-1.8068	4.50719e-12	1.15759e-10	16.8772
209734_at	NCKAP1L	-1.08466	5.27558e-12	1.33384e-10	16.7234
203021_at	SLPI	-1.76601	5.29278e-12	1.33384e-10	16.7202
218986_s_at	DDX60	-1.11389	5.35641e-12	1.34748e-10	16.7085
205579_at	HRH1	-1.31851	5.67287e-12	1.41981e-10	16.6524
218404_at	SNX10	-1.22372	6.5481e-12	1.61213e-10	16.5122
204567_s_at	ABCG1	-1.26564	6.62277e-12	1.62847e-10	16.5011
201105_at	LGALS1	-1.02909	7.52148e-12	1.8311e-10	16.3768
235175_at	GBP4	-1.18548	7.69609e-12	1.86666e-10	16.3543
203939_at	NT5E	-1.90677	7.77273e-12	1.8806e-10	16.3446
208982_at	PECAM1	-1.12896	7.95769e-12	1.92061e-10	16.3217
206666_at	GZMK	-1.64144	8.25264e-12	1.98691e-10	16.2861
204222_s_at	GLIPR1	-1.21127	8.32833e-12	2.00268e-10	16.2772
211776_s_at	EPB41L3	-1.08695	8.59855e-12	2.05506e-10	16.246
204079_at	TPST2	-1.00065	8.70583e-12	2.07817e-10	16.2339
212473_s_at	MICAL2	-1.33722	9.47496e-12	2.25355e-10	16.1512
221760_at	MAN1A1	-1.55841	9.98133e-12	2.3605e-10	16.1003
213418_at	HSPA6	-1.24113	1.03569e-11	2.43966e-10	16.0642
205758_at	CD8A	-1.31879	1.17844e-11	2.75607e-10	15.9381
203729_at	EMP3	-1.06926	1.20621e-11	2.81431e-10	15.9153
220196_at	MUC16	-2.0285	1.26802e-11	2.94452e-10	15.8665
203642_s_at	COBLL1	-1.08777	1.30645e-11	3.03016e-10	15.8373
209875_s_at	SPP1	-1.33979	1.5954e-11	3.64434e-10	15.6422
208370_s_at	RCAN1	-1.18732	1.75424e-11	3.98398e-10	15.5495
212354_at	SULF1	-2.20582	1.85469e-11	4.18789e-10	15.4951
227480_at	SUSD2	-1.62381	1.88651e-11	4.24996e-10	15.4785
207574_s_at	GADD45B	-1.29418	1.89794e-11	4.27081e-10	15.4726
210133_at	CCL11	-1.47248	2.12267e-11	4.74385e-10	15.3633
220918_at	C21orf96	-1.1409	2.37439e-11	5.2704e-10	15.2539
208581_x_at	MT1X	-1.23284	2.42413e-11	5.36866e-10	15.2337
202664_at	WIPF1	-1.25794	2.9021e-11	6.27839e-10	15.058
204971_at	CSTA	-1.4302	2.91996e-11	6.31007e-10	15.052
209792_s_at	KLK10	-2.07812	2.95139e-11	6.36397e-10	15.0416
200632_s_at	NDRG1	-1.11389	3.36919e-11	7.23306e-10	14.9123
213056_at	FRMD4B	-1.12354	3.49334e-11	7.46692e-10	14.877
205479_s_at	PLAU	-1.60543	3.69785e-11	7.88687e-10	14.8215
201170_s_at	BHLHE40	-1.14085	3.76518e-11	8.01306e-10	14.8039
218400_at	OAS3	-1.22562	4.22347e-11	8.90149e-10	14.6918
217763_s_at	RAB31	-1.24995	4.61924e-11	9.64242e-10	14.6044
205495_s_at	GNLY	-1.07763	4.6996e-11	9.77895e-10	14.5875
222838_at	SLAMF7	-1.74474	4.80961e-11	9.95944e-10	14.565
225871_at	STEAP2	-1.27445	4.95206e-11	1.02176e-09	14.5365
201739_at	SGK1	-1.0537	5.51252e-11	1.12351e-09	14.4319
211456_x_at	MT1P2	-1.11623	5.5172e-11	1.12351e-09	14.4311
205306_x_at	KMO	-1.08116	6.10429e-11	1.22724e-09	14.3324
212859_x_at	MT1E	-1.4811	7.01604e-11	1.39482e-09	14.1966
206134_at	ADAMDEC1	-2.20425	7.3389e-11	1.44873e-09	14.1527
203571_s_at	C10orf116	-1.95197	7.6635e-11	1.50791e-09	14.1105
206125_s_at	KLK8	-1.20213	9.23046e-11	1.8004e-09	13.9291
215946_x_at	IGLL3	-1.88078	9.95019e-11	1.9331e-09	13.8559
37005_at	NBL1	-1.26993	1.03012e-10	1.99536e-09	13.822
219806_s_at	C11orf75	-1.00348	1.26173e-10	2.41303e-09	13.6243
230179_at	LOC285812	-1.31693	1.2754e-10	2.43443e-09	13.6138
203083_at	THBS2	-2.36576	1.36038e-10	2.57907e-09	13.5509
203185_at	RASSF2	-1.05804	1.36294e-10	2.58144e-09	13.5491
210029_at	IDO1	-1.86756	1.5474e-10	2.90556e-09	13.4254
204661_at	CD52	-1.35533	1.5538e-10	2.91478e-09	13.4213
238513_at	PRRG4	-1.14008	1.68e-10	3.13654e-09	13.3452
204990_s_at	ITGB4	-1.02743	1.78029e-10	3.29867e-09	13.2887
209846_s_at	BTN3A2	-1.10678	1.91953e-10	3.53663e-09	13.2153
231956_at	KIAA1618	-1.03996	2.19494e-10	3.99158e-09	13.0847
210164_at	GZMB	-1.29864	2.2259e-10	4.04412e-09	13.071
210397_at	DEFB1	-2.24169	2.42832e-10	4.38752e-09	12.9862
209498_at	CEACAM1	-1.27193	2.51861e-10	4.5423e-09	12.9507
213524_s_at	G0S2	-1.24045	2.6573e-10	4.77487e-09	12.8984
202436_s_at	CYP1B1	-1.76443	2.68768e-10	4.82504e-09	12.8874
209360_s_at	RUNX1	-1.27593	2.91044e-10	5.18698e-09	12.8098
224964_s_at	GNG2	-1.17437	2.9306e-10	5.21818e-09	12.8031
206461_x_at	MT1H	-1.20515	3.0251e-10	5.37182e-09	12.7722
219768_at	VTCN1	-2.1928	3.73296e-10	6.49362e-09	12.5674
204563_at	SELL	-1.28826	3.80867e-10	6.6136e-09	12.5478
228167_at	KLHL6	-1.05043	3.86742e-10	6.70968e-09	12.5329
218424_s_at	STEAP3	-1.016	4.07708e-10	7.02302e-09	12.4815
201506_at	TGFBI	-1.20115	4.27776e-10	7.31807e-09	12.4347
230563_at	RASGEF1A	-1.55711	4.32394e-10	7.38418e-09	12.4243
203936_s_at	MMP9	-1.57635	4.66057e-10	7.91088e-09	12.3513
225987_at	STEAP4	-1.56472	4.716e-10	7.99114e-09	12.3397
209803_s_at	PHLDA2	-1.33772	5.48544e-10	9.18077e-09	12.1926
205542_at	STEAP1	-1.38557	6.24005e-10	1.02979e-08	12.0672
235706_at	CPM	-1.16199	6.96995e-10	1.14065e-08	11.9595
205671_s_at	HLA-DOB	-1.00139	7.27771e-10	1.18509e-08	11.9174
205780_at	BIK	-1.23061	7.33093e-10	1.19277e-08	11.9103
205242_at	CXCL13	-2.08031	7.95877e-10	1.28638e-08	11.8304
226436_at	RASSF4	-1.11251	8.55146e-10	1.37764e-08	11.7605
230836_at	ST8SIA4	-1.14721	8.90936e-10	1.42943e-08	11.7206
201641_at	BST2	-1.23637	9.46258e-10	1.50466e-08	11.662
204362_at	SKAP2	-1.14673	1.03743e-09	1.64298e-08	11.5725
236313_at	CDKN2B	-1.42323	1.17887e-09	1.83895e-08	11.4482
214453_s_at	IFI44	-1.23557	1.19383e-09	1.85726e-08	11.4359
202157_s_at	CUGBP2	-1.15337	1.20613e-09	1.86941e-08	11.426
222750_s_at	SRD5A3	-1.09061	1.38196e-09	2.11849e-08	11.2936
205476_at	CCL20	-1.78145	1.43203e-09	2.18671e-08	11.259
212992_at	AHNAK2	-1.60192	1.45529e-09	2.21706e-08	11.2433
204537_s_at	GABRE	-1.66511	1.87236e-09	2.78118e-08	10.9983
205590_at	RASGRP1	-1.33876	1.94368e-09	2.87623e-08	10.962
217378_x_at	LOC100130100	-2.26968	1.95999e-09	2.896e-08	10.9539
209627_s_at	OSBPL3	-1.18097	2.48088e-09	3.60058e-08	10.7248
221584_s_at	KCNMA1	-1.11323	2.66129e-09	3.84251e-08	10.6566
203324_s_at	CAV2	-1.10109	2.78306e-09	4.0036e-08	10.6131
209723_at	SERPINB9	-1.01834	2.92196e-09	4.18502e-08	10.5658
202202_s_at	LAMA4	-1.27757	3.4049e-09	4.83436e-08	10.4172
218729_at	LXN	-1.08231	3.65336e-09	5.161e-08	10.3488
203180_at	ALDH1A3	-1.62186	3.78592e-09	5.31764e-08	10.3142
205692_s_at	CD38	-1.15542	4.08625e-09	5.69059e-08	10.2401
205569_at	LAMP3	-1.46761	4.88004e-09	6.70561e-08	10.0677
228055_at	NAPSB	-1.00192	6.05574e-09	8.12206e-08	9.85817
204197_s_at	RUNX3	-1.23137	6.22098e-09	8.32661e-08	9.83204
204017_at	KDELR3	-1.09479	7.02386e-09	9.29348e-08	9.71424
202283_at	SERPINF1	-1.62375	7.47107e-09	9.79929e-08	9.65435
205363_at	BBOX1	-1.76746	7.83378e-09	1.01865e-07	9.60835
219014_at	PLAC8	-1.19835	8.5887e-09	1.10149e-07	9.51909
205174_s_at	QPCT	-1.26677	8.66412e-09	1.11043e-07	9.51061
206631_at	PTGER2	-1.21569	8.97452e-09	1.14797e-07	9.47647
1569003_at	TMEM49	-1.03097	9.03022e-09	1.15284e-07	9.47047
205844_at	VNN1	-1.18783	9.41079e-09	1.19403e-07	9.43042
209692_at	EYA2	-1.51384	9.49078e-09	1.20147e-07	9.42221
211798_x_at	IGLJ3	-1.90027	1.00522e-08	1.26764e-07	9.36647
203305_at	F13A1	-1.22702	1.02925e-08	1.29378e-07	9.34356
205081_at	CRIP1	-1.35664	1.0471e-08	1.31201e-07	9.32689
211675_s_at	MDFIC	-1.04526	1.23518e-08	1.53009e-07	9.16671
219836_at	ZBED2	-1.82096	1.25073e-08	1.54643e-07	9.15457
210942_s_at	ST3GAL6	-1.06599	1.68297e-08	2.02597e-07	8.86685
223748_at	SLC4A11	-1.46647	1.83525e-08	2.19046e-07	8.78291
220088_at	C5AR1	-1.00962	1.88796e-08	2.24842e-07	8.75547
210511_s_at	INHBA	-1.89079	1.92522e-08	2.28673e-07	8.73654
205943_at	TDO2	-1.87401	2.38068e-08	2.77563e-07	8.53083
202888_s_at	ANPEP	-1.55392	2.75819e-08	3.16499e-07	8.38829
206025_s_at	TNFAIP6	-1.34544	3.0063e-08	3.42763e-07	8.30489
219874_at	SLC12A8	-1.04716	3.12769e-08	3.55571e-07	8.26657
227475_at	FOXQ1	-1.55692	3.17369e-08	3.5955e-07	8.25243
204745_x_at	MT1G	-1.1349	3.75815e-08	4.18515e-07	8.08882
203662_s_at	TMOD1	-1.13857	4.40255e-08	4.85592e-07	7.93568
213241_at	PLXNC1	-1.01754	5.0604e-08	5.51946e-07	7.80096
216401_x_at	LOC652493	-2.04586	5.74501e-08	6.2041e-07	7.67824
213338_at	TMEM158	-1.59211	6.53734e-08	6.97529e-07	7.55331
204942_s_at	ALDH3B2	-1.20832	6.74826e-08	7.15754e-07	7.52261
214164_x_at	CA12	-1.24881	6.88917e-08	7.28729e-07	7.50263
227399_at	VGLL3	-1.25746	6.90156e-08	7.29646e-07	7.50089
214777_at	IGKV4-1	-2.09471	7.344e-08	7.71021e-07	7.44083
204159_at	CDKN2C	-1.26146	7.54466e-08	7.89553e-07	7.41477
205666_at	FMO1	-1.29725	8.33161e-08	8.63162e-07	7.31888
226960_at	CXCL17	-1.68345	8.55673e-08	8.83221e-07	7.29312
221019_s_at	COLEC12	-1.32751	8.92982e-08	9.17387e-07	7.25188
236044_at	PPAPDC1A	-1.37895	9.29538e-08	9.51455e-07	7.21311
201348_at	GPX3	-1.47618	1.18136e-07	1.18693e-06	6.98154
205470_s_at	KLK11	-1.44082	1.51429e-07	1.48939e-06	6.74184
214844_s_at	DOK5	-1.48979	1.6015e-07	1.56498e-06	6.68779
209374_s_at	IGHM	-1.90361	1.65544e-07	1.60967e-06	6.65582
209955_s_at	FAP	-1.89229	1.75693e-07	1.69241e-06	6.59841
201893_x_at	DCN	-1.50925	1.87528e-07	1.79671e-06	6.53551
227725_at	ST6GALNAC1	-1.61304	1.89737e-07	1.81699e-06	6.52421
201952_at	ALCAM	-1.03347	1.9209e-07	1.83505e-06	6.51232
217480_x_at	IGKV1OR15-118	-1.43454	2.36897e-07	2.21563e-06	6.3101
218858_at	DEPDC6	-1.11302	2.39054e-07	2.23368e-06	6.30136
230482_at	ST6GALNAC5	-1.31948	2.58242e-07	2.39585e-06	6.22692
225664_at	COL12A1	-1.51156	2.7446e-07	2.53552e-06	6.1682
213909_at	LRRC15	-1.554	2.8089e-07	2.59005e-06	6.14587
201744_s_at	LUM	-1.80305	3.15543e-07	2.87446e-06	6.03376
204439_at	IFI44L	-1.3643	3.82688e-07	3.421e-06	5.84788
226695_at	PRRX1	-1.73432	3.96125e-07	3.53147e-06	5.81464
203153_at	IFIT1	-1.27781	4.51731e-07	3.98018e-06	5.68815
211726_s_at	FMO2	-1.36044	4.69208e-07	4.11753e-06	5.6516
202952_s_at	ADAM12	-1.2298	4.71389e-07	4.13482e-06	5.64714
1552797_s_at	PROM2	-1.26984	4.95333e-07	4.32551e-06	5.59944
205328_at	CLDN10	-1.72934	5.11585e-07	4.45554e-06	5.56836
205979_at	SCGB2A1	-1.88941	5.17965e-07	4.49117e-06	5.55643
204051_s_at	SFRP4	-1.7853	5.73235e-07	4.91394e-06	5.45886
213800_at	CFH	-1.18483	6.84478e-07	5.73477e-06	5.28823
218435_at	DNAJC15	-1.1652	7.24832e-07	6.02655e-06	5.23313
228708_at	RAB27B	-1.02755	8.56951e-07	7.01213e-06	5.07214
201842_s_at	EFEMP1	-1.52151	9.08699e-07	7.38629e-06	5.01578
240304_s_at	TMC5	-1.50363	9.66282e-07	7.78981e-06	4.95674
201667_at	GJA1	-1.17122	9.80153e-07	7.87897e-06	4.94304
218960_at	TMPRSS4	-1.27563	9.89006e-07	7.93712e-06	4.9344
209283_at	CRYAB	-1.15207	9.93604e-07	7.961e-06	4.92994
202859_x_at	IL8	-1.37464	1.09589e-06	8.69185e-06	4.8358
216442_x_at	FN1	-1.30503	1.10062e-06	8.72224e-06	4.83167
205483_s_at	ISG15	-1.18588	1.17026e-06	9.21093e-06	4.77274
209687_at	CXCL12	-1.38371	1.17472e-06	9.23625e-06	4.76909
215446_s_at	LOX	-1.72819	1.22867e-06	9.63203e-06	4.72596
221942_s_at	GUCY1A3	-1.13726	1.33868e-06	1.03906e-05	4.64362
209621_s_at	PDLIM3	-1.11561	1.35919e-06	1.0529e-05	4.62902
223122_s_at	SFRP2	-2.59776	1.42454e-06	1.09918e-05	4.58395
226545_at	CD109	-1.14304	1.42707e-06	1.10071e-05	4.58224
201042_at	TGM2	-1.07822	1.48819e-06	1.14201e-05	4.54198
216615_s_at	HTR3A	-1.35219	1.60725e-06	1.22162e-05	4.46812
214973_x_at	IGHD	-1.49856	1.60749e-06	1.22162e-05	4.46798
213462_at	NPAS2	-1.04226	1.61039e-06	1.22335e-05	4.46625
227566_at	NTM	-1.71978	1.61171e-06	1.22387e-05	4.46547
1554179_s_at	LYNX1	-1.27392	1.92733e-06	1.43359e-05	4.2939
205267_at	POU2AF1	-1.43581	1.94664e-06	1.44631e-05	4.28434
218857_s_at	ASRGL1	-1.01268	2.25597e-06	1.65174e-05	4.14294
218901_at	PLSCR4	-1.00488	2.34045e-06	1.70913e-05	4.1077
218469_at	GREM1	-1.71846	2.37855e-06	1.73115e-05	4.09223
226875_at	DOCK11	-1.01027	2.39165e-06	1.73811e-05	4.08696
209774_x_at	CXCL2	-1.36955	2.47113e-06	1.79123e-05	4.05563
202917_s_at	S100A8	-1.63422	2.79137e-06	1.99972e-05	3.93888
225242_s_at	CCDC80	-1.53317	3.52351e-06	2.45956e-05	3.71583
206439_at	EPYC	-2.21562	3.63452e-06	2.52448e-05	3.68614
202489_s_at	FXYD3	-1.12033	3.76878e-06	2.61034e-05	3.65142
223315_at	NTN4	-1.15682	4.13249e-06	2.82831e-05	3.56327
203060_s_at	PAPSS2	-1.00334	4.26623e-06	2.91071e-05	3.5328
204337_at	RGS4	-1.16786	4.31378e-06	2.93979e-05	3.5222
228865_at	C1orf116	-1.02227	4.53923e-06	3.07558e-05	3.47347
204885_s_at	MSLN	-1.17035	4.59374e-06	3.10822e-05	3.46205
202450_s_at	CTSK	-1.43065	4.75231e-06	3.19787e-05	3.4296
203878_s_at	MMP11	-1.36249	4.80865e-06	3.23245e-05	3.41833
204457_s_at	GAS1	-1.17739	5.05624e-06	3.37806e-05	3.37033
213831_at	HLA-DQA1	-2.10578	5.16169e-06	3.44499e-05	3.3506
223631_s_at	C19orf33	-1.09766	5.71823e-06	3.76647e-05	3.25273
204464_s_at	EDNRA	-1.20456	6.08715e-06	3.99137e-05	3.19299
205941_s_at	COL10A1	-1.44894	6.9513e-06	4.48974e-05	3.06619
230867_at	COL6A6	-1.04423	7.53183e-06	4.82657e-05	2.98961
204470_at	CXCL1	-1.11294	7.63952e-06	4.8876e-05	2.97606
232318_s_at	LOC121838	-1.10174	8.09601e-06	5.15277e-05	2.92066
202291_s_at	MGP	-1.03592	8.28143e-06	5.26054e-05	2.89905
220994_s_at	STXBP6	-1.23247	8.30406e-06	5.27151e-05	2.89645
205334_at	S100A1	-1.03647	8.69901e-06	5.49025e-05	2.85211
209612_s_at	ADH1B	-1.84849	9.62397e-06	6.00259e-05	2.75572
219274_at	TSPAN12	-1.05239	9.81745e-06	6.10967e-05	2.73674
229296_at	LOC100128501	-1.02249	1.06548e-05	6.56003e-05	2.6587
201109_s_at	THBS1	-1.22849	1.08102e-05	6.64114e-05	2.64489
226930_at	FNDC1	-1.40701	1.08137e-05	6.64117e-05	2.64459
226997_at	ADAMTS12	-1.11741	1.15006e-05	7.00606e-05	2.58588
210809_s_at	POSTN	-2.31874	1.23e-05	7.42915e-05	2.52185
229638_at	IRX3	-1.20695	1.25775e-05	7.57742e-05	2.50059
218692_at	GOLSYN	-1.17933	1.36239e-05	8.14034e-05	2.42447
218807_at	VAV3	-1.432	1.43456e-05	8.52188e-05	2.37532
209016_s_at	KRT7	-1.07753	1.48391e-05	8.77029e-05	2.34311
201438_at	COL6A3	-1.22311	1.52464e-05	8.99474e-05	2.31734
219087_at	ASPN	-1.65184	1.61615e-05	9.46066e-05	2.26186
206641_at	TNFRSF17	-1.0728	1.64663e-05	9.62187e-05	2.24408
209278_s_at	TFPI2	-1.42784	1.68935e-05	9.84216e-05	2.21971
207480_s_at	MEIS2	-1.0922	1.76318e-05	0.000102298	2.17901
204259_at	MMP7	-1.47607	1.79351e-05	0.000103996	2.16278
200974_at	ACTA2	-1.07582	1.8398e-05	0.000106272	2.13854
234994_at	TMEM200A	-1.0458	1.93861e-05	0.000111129	2.08879
203691_at	PI3	-1.27821	2.13446e-05	0.000121363	1.9973
211748_x_at	PTGDS	-1.11381	2.33507e-05	0.000131512	1.91193
213125_at	OLFML2B	-1.02084	2.37841e-05	0.00013365	1.89446
206101_at	ECM2	-1.00991	2.80311e-05	0.000154372	1.73843
202504_at	TRIM29	-1.16502	2.87575e-05	0.000157664	1.71415
207173_x_at	CDH11	-1.2838	3.52221e-05	0.000189091	1.52178
228057_at	DDIT4L	-1.03339	4.79601e-05	0.00024871	1.22931
221541_at	CRISPLD2	-1.19911	5.15494e-05	0.000265556	1.161
223843_at	SCARA3	-1.10403	5.27461e-05	0.000271151	1.13928
222484_s_at	CXCL14	-1.5788	6.30838e-05	0.000318208	0.97002
217546_at	MT1M	-1.22423	6.38888e-05	0.000322103	0.958034
203535_at	S100A9	-1.2003	6.61442e-05	0.000332364	0.925246
238021_s_at	CRNDE	-1.26305	7.21577e-05	0.000358359	0.843037
230673_at	PKHD1L1	-1.28453	8.00358e-05	0.000392518	0.745195
227919_at	UCA1	-1.17658	8.23683e-05	0.000402548	0.718082
227194_at	FAM3B	-1.10354	8.70103e-05	0.000423231	0.666348
219773_at	NOX4	-1.21471	8.7315e-05	0.000423887	0.66305
213139_at	SNAI2	-1.0852	9.31544e-05	0.000449441	0.601987
203980_at	FABP4	-2.04026	9.47031e-05	0.000456016	0.586438
223235_s_at	SMOC2	-1.00815	0.000102136	0.000488689	0.515204
205899_at	CCNA1	-1.2871	0.000106622	0.000506814	0.474701
206227_at	CILP	-1.03741	0.000122804	0.000573182	0.341617
232231_at	RUNX2	-1.07593	0.00015368	0.000697388	0.130635
204268_at	S100A2	-1.11981	0.000183316	0.000814914	-0.0350206
213921_at	SST	-1.72015	0.000184111	0.000817756	-0.0390821
206488_s_at	CD36	-1.10753	0.000219038	0.00095151	-0.202053
209644_x_at	CDKN2A	-1.01883	0.000220116	0.000955558	-0.206655
235182_at	ISM1	-1.03712	0.00025886	0.00110373	-0.358566
203726_s_at	LAMA3	-1.14641	0.000290012	0.00122037	-0.464923
218186_at	RAB25	-1.19252	0.000310343	0.00129897	-0.528296
202376_at	SERPINA3	-1.00546	0.000344756	0.00142687	-0.62658
210096_at	CYP4B1	-1.36044	0.000365071	0.00149612	-0.680055
228195_at	C2orf88	-1.24154	0.000376786	0.00153643	-0.709544
205975_s_at	HOXD1	-1.21503	0.000510823	0.00200628	-0.993269
